# Supplementary material for: Transition metal-free asymmetric and diastereoselective allylic alkylation using Grignard reagents: construction of vicinal stereogenic centers via kinetic resolution
Source: Royal Society of Chemistry journal article supplement (doi:10.1039/c4sc01003e), 2014-01-01

# **Transition metal free free Asymmetric and Diastereoselective Allylic Alkylation using Grignard reagents: Construction of vicinal stereogenic centers via Kinetic resolution.**

David Grassi and Alexandre Alexakis\*

Department of Organic Chemistry, University of Geneva, 30 quai Ernest Ansermet CH-1211  
Geneva 4, Switzerland.

E.mail: [alexandre.alexakis@unige.ch](mailto:alexandre.alexakis@unige.ch)

## **SUPPORTING INFORMATION AVAILABLE**

|                                                                          |        |
|--------------------------------------------------------------------------|--------|
| 1. General remarks.....                                                  | 2.     |
| 2. Catalysis adducts characterization and preparation of substrates..... | 3-19.  |
| 3. GC traces.....                                                        | 20-61. |
| 4. NMR spectra.....                                                      | 62-95. |

## General Remarks.

All reactions were not carried out under nitrogen or argon atmosphere in flame-dried glassware and with dry solvents. Solvents (THF, Et<sub>2</sub>O, Toluene, DCM, MTBE and CH<sub>3</sub>CN) were dried over alumina (activated at 350 °C under nitrogen atmosphere for 12 h). Yields refer to chromatographically and spectroscopically <sup>1</sup>H NMR homogeneous materials, unless otherwise stated. Reactions were monitored by GC-MS Hewlet Packard (EI mode) HP6890-5973 on an HP6890 or by TLC carried out on 0.25 mm E. Merck silica gel plates (60F-254) using UV lamp as visualizing agent and KMnO<sub>4</sub> solution as developing agents. Flash chromatographies were performed using silica gel (particle size 32-63 μm, 60 Å). <sup>1</sup>H (300, 400 MHz or 500 MHz) and <sup>13</sup>C (75 or 100 MHz) NMR spectra were recorded on Bruker AMX-300 or 400 instrument in CDCl<sub>3</sub> and calibrated using residual undeuterated solvent as an internal reference. Chemical shift (δ) are given in ppm relative to tetramethylsilane (0 ppm). Multiplicity is indicated as follows: s (singlet), d (doublet), t (triplet), q (quartet), m (multiplet), dd (doublet of doublet), br s (broad singlet). Coupling constants *J* are reported in Hz. Mass spectra (MS) and High resolution mass spectra (HRMS) were obtained by Electrospray Ionisation (ESI) or by electronic impact (EI, 70 eV). Optical rotations were measured at 20°C in a 10 cm cell in the stated solvent; [α]<sub>D</sub> values are given in 10<sup>-1</sup> deg.cm<sup>2</sup> g<sup>-1</sup> (concentration *c* given as g/100 mL). Enantiomeric excesses were determined either by chiral GC measurement on a HP6890 (H<sub>2</sub> as vector gas) or HP6850 (He or H<sub>2</sub> as vector gas). Temperature programs are described as follows: initial T (°C) – initial times (min) – temperature gradient (°C/min) – final T (°C); retention times (RT) are given in min.). or by SFC with supercritical carbon dioxide as vector and *i*PrOH or MeOH. Programme sequence as followed: Name of the column, percentage of *i*PrOH or MeOH. retention time 1 and retention time 2.

## Optimization of the ligand.

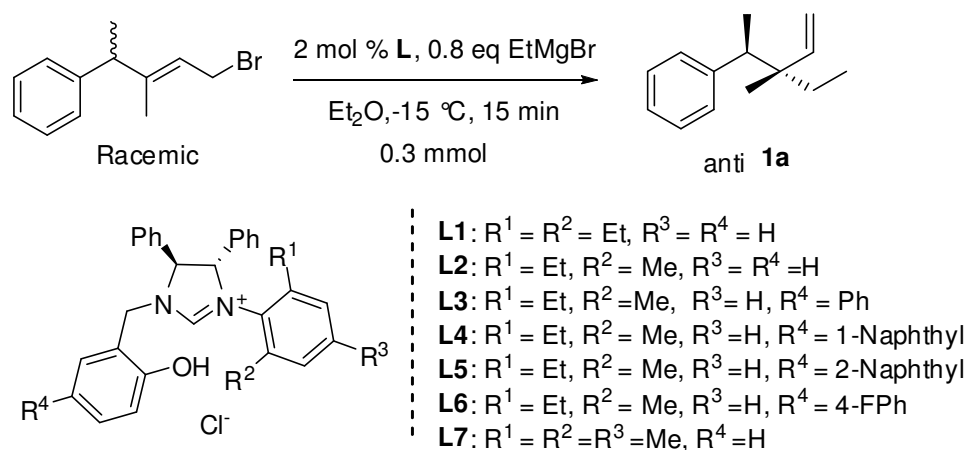

| Entry | L         | Conv% <sup>[a]</sup>   | S <sub>N</sub> 2'/S <sub>N</sub> 2 <sup>[a]</sup> | anti/syn <sup>[a]</sup> | e:r % <sup>[b]</sup> |
|-------|-----------|------------------------|---------------------------------------------------|-------------------------|----------------------|
| 1     | <b>L6</b> | 50                     | 100/0                                             | 100/0                   | 82:18                |
| 2     | <b>L1</b> | 50 (20) <sup>[c]</sup> | 100/0                                             | 100/0                   | 91:9                 |
| 3     | <b>L2</b> | 52 (25) <sup>[c]</sup> | 100/0                                             | 100/0                   | 91:9                 |
| 4     | <b>L3</b> | 50                     | 100/0                                             | 100/0                   | 85:15                |
| 5     | <b>L4</b> | 52 (35) <sup>[c]</sup> | 100/0                                             | 100/0                   | 91:9                 |
| 6     | <b>L5</b> | 52                     | 100/0                                             | 100/0                   | 88:12                |
| 7     | <b>L7</b> | 50                     | 100/0                                             | 100/0                   | 85:15                |

Table 1: <sup>[a]</sup> Ratio determined by <sup>1</sup>H-(NMR). <sup>[b]</sup> Determined using chiral GC. <sup>[c]</sup> Isolated yield after silica gel column chromatography on 0.8 mmol scale.

The screening of the ligand library began by examination of the importance of the blocking part of the ligand (left part). The switch from two methyl **L7** to a ethyl/methyl **L2** pattern or a ethyl/ethyl **L1** pattern allowed to improve the enantioselectivity greatly (Tables 1. Entry 1 vs Entries 2,3). However no difference in terms of enantioselectivity can be measured using **L1** or **L2**. Having these results in hand the screen of the moiety in para position of the hydroxyl group on the chelating part of the ligand was then probed (right part). The introduction of a phenyl group **L3** was deleterious on the enantiomeric excess (Table 1. Entry 4). On the opposite the use of more bulky **L4** with a 1-Naphthyl group afforded the same level of enantiomeric excess than **L1** or **L2** (Table 1. Entries 2,3 vs Entry 5). A slight modification of the ligand morphology by using a 2-Naphthyl group **L6** led to a decrease of the ee value to 76 % ee (Table 1. Entry 6). The introduction of a fluorine group led to a decrease of the enantioselectivity to 70 % ee (Table 1. Entry 7). The ligands **L1**, **L2** and **L4** were compared

by isolating the product after silica gel chromatography. To our surprise the ligand **L4** allowed us to isolate the desired adduct in 35 % isolated yield versus 20 and 25 % isolated yield respectively for the ligand **L1** and **L2**. To conclude the enantioselectivity and the isolated yield can be controlled by tuning in an appropriate way the NHC ligand. The diastereoselectivity and the regioselectivity are not affected whatever is the structure of the NHC ligand employed.

The desired methyl ketones were commercially available or prepared according to the following procedure (M. Mc Intosh and al, *J. Org. Chem*, **1983**, 48, 2987.). The other ketone were prepared according to the procedure (G. B. Trimitis and al, *Org. Lett*, **2010**, 9, 1996).

### Preparation of substrate.

Into a conditioned two necked round bottomed flask the appropriate ketone (1.5 g, 1 eq) is added and dissolved in 25 mL of dry THF. The round bottomed flask is placed into a bath containing crushed ice. The vinyl magnesium chloride (1.5 eq) is added dropwise and the ice bath is removed and the mixture is stirred at room temperature for 2 h. After completion by TLC the round bottomed flask is placed into an ice bath and 20 mL of saturated aqueous solution of ammonium chloride is added. 30 mL of ether is added and the aqueous phase is extracted two times with 20 mL portion of ether each. The organic phases are combined and dried over anhydrous sodium sulfate. The solvent is removed using a rotavapor and dried over high vacuum using an oil pump. The <sup>1</sup>H NMR analysis of the crude revealed a pure compound which is used in the next step without further purification. The tertiary alcohol (1 eq) is diluted in a mixture of pentane/ether 9/1 and HBr (48 % aq, 5 mL) is added under vigorous stirring. After 30 min (crucial to respect the exact time) the aqueous phase is removed using a separation funnel. The organic phase is washed with saturated solution of sodium bicarbonate. The organic phase is dried over sodium sulfate. The solvent is evaporated and the product is dried under high vacuum. Products are recovered 100 % E isomer and are silica gel, basic alumina and neutral alumina sensitive product in 55-62 % yield over two steps.

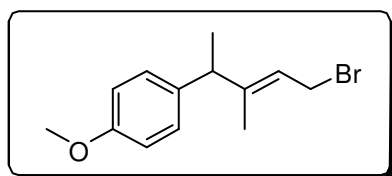

Compound is obtained as brown oil with 70 % purity (55 % yield based on purity) >99/1 % E isomer and is used as crude and stored in the freezer at -30°C. <sup>1</sup>H (NMR) (400 MHz,

$C_6H_6$ )  $\delta$  7.20-6.80 (m, 4H) 5.75 (t, 1H,  $J=8$ Hz) 4.10 (d, 2H,  $J=8.2$  Hz) 3.62 (s, 3H) 3.50 (q, 1H,  $J=6.9$  Hz) 1.66 (s, 3H) 1.46 (d, 3H,  $J=7.1$  Hz).  $^{13}C$  NMR (75 MHz,  $C_6H_6$ )  $\delta$  158.5, 146.5, 136, 128.9 120.1, 113.8, 54.5, 46.5, 28.92, 20.1, 17.1.

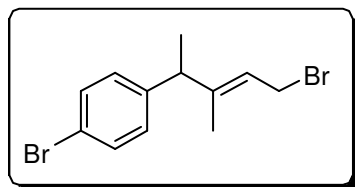

Compound is obtained as brown oil with 75 % purity (58 % yield based on purity) >99/1 % E isomer and is used as crude and stored in the freezer at  $-30^\circ C$ .  $^1H$  (NMR) (400 MHz,  $C_6H_6$ )  $\delta$  7.50-7.20 (m, 2H) 6.90-6.80 (m, 2H) 5.70 (t, 1H,  $J=8.2$  Hz) 4.03 (d, 2H,  $J=8.4$  Hz) 3.75 (q, 1H,  $J=7$  Hz) 1.53 (s, 3H) 1.33 (d, 3H,  $J=7.1$  Hz).  $^{13}C$  NMR (75 MHz,  $C_6H_6$ )  $\delta$  145, 143, 129.9, 129.8, 120.8, 120.2, 46.7, 28.5, 20.4, 18.7. HRMS (EI + mode) m:z expected: 315,9462 observed: 315,9463.

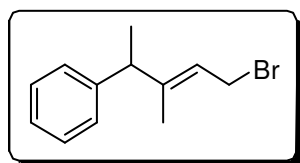

Compound is obtained as brown oil with 75 % purity (56 % yield based on purity) >99/1 % E isomer and is used as crude and stored in the freezer at  $-30^\circ C$ .  $^1H$  (NMR) (400 MHz,  $C_6H_6$ )  $\delta$  7.50-7.20 (m, 5H) 5.81 (t, 1H,  $J=8.5$  Hz) 4.11 (d, 2H,  $J=8.4$  Hz) 3.50 (q, 1H,  $J=7.1$  Hz) 1.61 (s, 3H) 1.41 (d, 3H,  $J=6.2$  Hz).  $^{13}C$  NMR (75 MHz,  $C_6H_6$ )  $\delta$  146, 144.2, 128.5, 128.3, 127.7, 127.5, 126.3, 126.2, 47.4, 28.7, 19, 14.3. HRMS (EI + mode) m:z expected: 238,0357 observed: 238,0358.

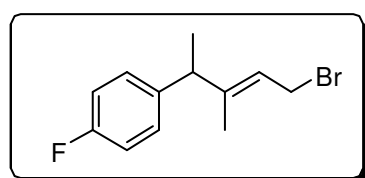

Compound is obtained as brown oil with 80 % purity (62 % yield based on purity) >99/1 % E isomer and is used as crude and stored in the freezer at  $-30^\circ C$ .  $^1H$  (NMR) (400 MHz,  $C_6H_6$ )  $\delta$  7.50-7.20 (m, 5H) 5.78 (t, 1H,  $J=8.4$  Hz) 4.09 (d, 2H,  $J=8.4$  Hz) 3.85 (q, 1H,  $J=7.1$  Hz) 1.59 (s, 3H) 1.38 (d, 3H,  $J=6.22$  Hz).  $^{13}C$  NMR (75 MHz,  $C_6H_6$ )  $\delta$  162 (dd,  $J=10.8$  Hz and  $J=243.9$  Hz), 146, 140 (d,  $J=3.2$  Hz), 139, 129.5 (d,  $J=7.6$  Hz), 128.6 (d,  $J=7.8$  Hz), 121, 115 (dd,  $J=4.7$  Hz and  $J=21$  Hz), 46.4, 28.6, 18.9, 14. HRMS (EI + mode) m:z expected: 256,0263 observed: 256,0262.

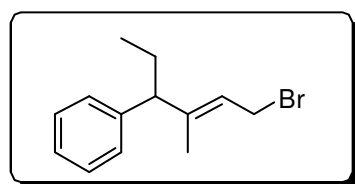

Compound is obtained as brown oil with 70 % purity (52 % yield based on purity) >99/1 % E isomer and is used as crude and stored in the freezer at  $-30^\circ C$ .  $^1H$  (NMR) (400 MHz,  $C_6H_6$ )  $\delta$  7.50-7.20 (m, 5H) 5.67 (t, 1H,  $J=8.4$  Hz) 3.94 (dd, 2H,  $J=1.3$  Hz and  $J=8.4$  Hz) 3.78 (t, 1H,  $J=7.6$  Hz) 1.55-1.45 (m, 2H) 1.30 (s, 3H) 0.85-0.7 (m, 3H).

$^{13}\text{C}$  NMR (75 MHz,  $\text{C}_6\text{H}_6$ )  $\delta$  144.9, 142.7, 129, 128.2, 127.8, 126.3, 120.9, 55.5, 28.7, 25.1, 13.8, 12.1. HRMS (EI + mode) m/z expected: 252,0514 observed: 252,0512.

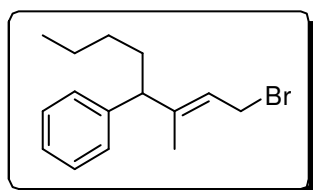

Compound is obtained as brown oil with 70 % purity (55 % yield based on purity) >99/1 % E isomer and is used as crude and stored in the freezer at  $-30^\circ\text{C}$ .  $^1\text{H}$  (NMR) (400 MHz,  $\text{C}_6\text{H}_6$ )  $\delta$  7.50-7.20 (m, 5H) 5.82 (t, 1H,  $J=8.3$  Hz) 4.09 (d, 2H,  $J=8.5$  Hz) 3.90 (t, 1H,  $J=7.5$  Hz) 1.60-1.50 (m, 4H) 1.4-1.30 (m, 2H) 1.30 (s, 3H) 0.8-0.7 (m, 3H).  $^{13}\text{C}$  NMR (75 MHz,  $\text{C}_6\text{H}_6$ )  $\delta$  145.1, 142.9, 128.9, 127.7, 126.4, 126.2, 120.8, 53.7, 31.9, 29.8, 28.7, 22.8, 13.9, 13.8. HRMS (EI + mode) m/z expected: 280,0827 observed: 280,0829.

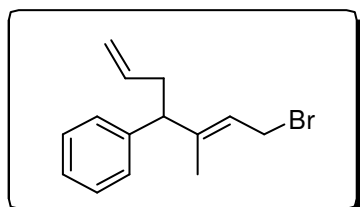

Compound is obtained as brown oil with 70 % purity (52 % yield based on purity) >99/1 % E isomer and is used as crude and stored in the freezer at  $-30^\circ\text{C}$ .  $^1\text{H}$  (NMR) (400 MHz,  $\text{C}_6\text{H}_6$ )  $\delta$  7.50-7.20 (m, 5H) 5.85-5.75 (m, 1H) 5.1-4.9 (m, 3H) 4.12 (t, 2H,  $J=8.3$  Hz) 3.9 (t, 1H,  $J=7.8$  Hz) 1.60 (s, 3H) 1.25 (t, 2H,  $J=6.6$  Hz).  $^{13}\text{C}$  NMR (75 MHz,  $\text{C}_6\text{H}_6$ )  $\delta$  144.3, 142.2, 136.9, 129, 128.2, 128.1, 126.4, 121.2, 115.9, 53.4, 36.8, 28.6, 20.8. HRMS (EI + mode) m/z expected: 264,0514 observed: 264,0514.

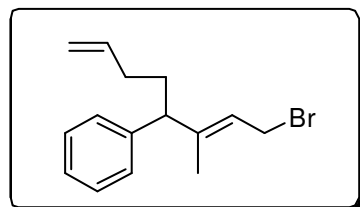

Compound is obtained as brown oil with 75 % purity (58 % yield based on purity) >99/1 % E isomer and is used as crude and stored in the freezer at  $-30^\circ\text{C}$ .  $^1\text{H}$  (NMR) (400 MHz,  $\text{C}_6\text{H}_6$ )  $\delta$  7.50-7.20 (m, 5H) 5.80-5.70 (m, 1H) 5-4.9 (m, 3H) 4.15 (t, 2H,  $J=8.3$  Hz) 3.88 (t, 1H,  $J=7.8$  Hz) 1.62 (s, 3H) 1.40-1.25 (m, 4H).  $^{13}\text{C}$  NMR (75 MHz,  $\text{C}_6\text{H}_6$ )  $\delta$  144.3, 142.2, 136.9, 129, 128.2, 128.1, 126.4, 121.2, 115.9, 53.4, 37.2, 36.8, 28.6, 20.8. HRMS (EI + mode) m/z expected: 278,0670 observed: 278,0671.

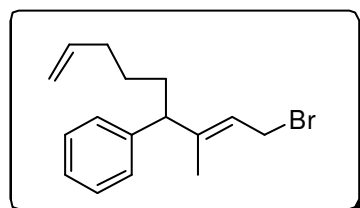

Compound is obtained as brown oil with 75 % purity (58 % yield based on purity) >99/1 % E isomer and is used as crude and stored in the freezer at  $-30^\circ\text{C}$ .  $^1\text{H}$  (NMR) (400 MHz,  $\text{C}_6\text{H}_6$ )  $\delta$  7.50-7.20 (m, 5H) 5.80-5.60 (m, 1H) 5-4.90 (m, 3H) 4.17 (t, 2H,  $J=8.3$  Hz) 3.86 (t, 1H,  $J=7.8$  Hz) 1.65 (s, 2H) 1.50-1.25 (m, 6H).  $^{13}\text{C}$  NMR (75 MHz,  $\text{C}_6\text{H}_6$ )  $\delta$  144.3, 142.2, 136.9, 129, 128.2, 128.1, 126.4, 121.2, 115.9, 53.4, 37.2, 36.8, 28.6, 20.8. HRMS (EI + mode) m/z expected: 292,0827 observed: 292,0828.

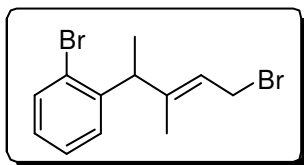

Compound is obtained as brown oil with 70 % purity (61 % yield based on purity) >99/1 % E isomer and is used as crude and stored in the freezer at -30°C. <sup>1</sup>H (NMR) (400 MHz, C<sub>6</sub>H<sub>6</sub>) δ 7.30-7.20 (m, 2H) 6.90- 6.80 (m, 2H) 5.71 (t, 1H, J= 8.3 Hz) 4.01 (d, 2H, J=8.3 Hz) 3.80 (q, 1H, J= 7.2 Hz) 1.51 (s, 3H) 1.31 (d, 3H, J= 7.1 Hz). <sup>13</sup>C NMR (75 MHz, C<sub>6</sub>H<sub>6</sub>) δ 145.2, 142, 129.6, 129.4, 121.8, 120.4, 47.2, 29.2, 20.1, 18.3. HRMS (EI + mode) m:z expected: 315,9462 observed: 315,9462.

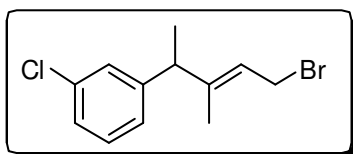

Compound is obtained as brown oil with 70 % purity (55 % yield based on purity) >99/1 % E isomer and is used as crude and stored in the freezer at -30°C. <sup>1</sup>H (NMR) (400 MHz, C<sub>6</sub>H<sub>6</sub>) δ 7.40-7.30 (m, 2H) 6.95-6.85 (m, 2H) 5.74 (t, 1H, J= 8.3 Hz) 4.05 (d, 2H, J=8.4 Hz) 3.44 (q, 1H, J= 7.3 Hz) 1.55 (s, 3H) 1.34 (d, 3H, J= 7.15 Hz). <sup>13</sup>C NMR (75 MHz, C<sub>6</sub>H<sub>6</sub>) δ 145.2, 142, 134, 129.6, 129.4, 121.8, 120.4, 53.3, 36.8, 28.8, 20.8. HRMS (EI + mode) m:z expected: 271,9967 observed: 271,9965.

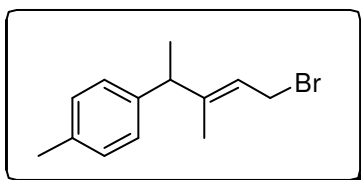

Compound is obtained as brown oil with 80 % purity (65 % yield based on purity) >99/1 % E isomer and is used as crude and stored in the freezer at -30°C. <sup>1</sup>H (NMR) (400 MHz, C<sub>6</sub>H<sub>6</sub>) δ 7.5-7.20 (m, 2H) 6.95-6.85 (m, 2H) 5.80 (t, 1H, J= 8 Hz) 4.10 (d, 2H, J=8.2 Hz) 3.89 (q, 1H, J=6.9 Hz) 2.36 (s, 3H) 1.61 (s, 3H) 1.40 (d, 3H, J= 7.1 Hz). <sup>13</sup>C NMR (75 MHz, C<sub>6</sub>H<sub>6</sub>) δ 146.5, 136, 128.9 120.1, 113.8, 46.5, 28.92, 21.8, 21.3, 20.1, 17.1.

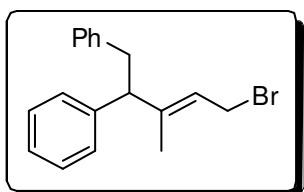

Compound is obtained as brown oil with 70 % purity (62 % yield based on purity) >99/1 % E isomer and is used as crude and stored in the freezer at -30°C. <sup>1</sup>H (NMR) (400 MHz, C<sub>6</sub>H<sub>6</sub>) δ 7.50-7.20 (m, 5H) 5.70 (t, 1H, J= 8Hz) 4.02 (d, 2H, J=8.2 Hz) 3.78 (q, 1H, J=6.9 Hz) 2.70 (d, 1H, J= 11.7 Hz ) 1.76 (s, 3H) 1.33 (d, 3H, J= 7.1 Hz). <sup>13</sup>C NMR (75 MHz, C<sub>6</sub>H<sub>6</sub>) δ 146, 141.8, 141.7, 130.2, 128.8, 127.9, 127.8, 127.4, 126 1, 120.1, 113.8, 55.5, 28.92, 21.8, 21.3, 20.1, 17.1.

### **Preparation of Grignard reagent.**

Into a conditioned two necked flask equipped with a reflux condenser and an addition funnel magnesium turnings (2,72 g, 1,3 eq) are introduced. The system is connected to high vacuum of the manifold and heat to 600 °C for 15 minutes using a heating gun. The magnesium turnings are stirred vigorously while cooling down into vacuum. The system is then backfilled with nitrogen and the cycle is repeated two times. The corresponding bromide (1 eq) is dissolved into 30 mL of dry ether and placed into the addition funnel. A few millilitres of the solution are poured and the Grignard formation starts by boiling of the ether. The rest of the solution is added over 45 minutes and stirring is continued for 2 hours. The liquid is cannulated into a conditioned bottle and titrated using phenanthroline/menthol. The typical concentrations obtained are between 1,8 M and 2,3 M.

### **Catalysis procedure for racemate.**

In a flame-dried Schlenk, under N<sub>2</sub> atmosphere, the racemic allylic bromide (0.8 mmol) and racemic NHC ligand **L** (2 mol %) are suspended in 3.2 mL of dry Et<sub>2</sub>O (crucial to respect the dilution) and cooled to -15°C. RMgBr x M in Et<sub>2</sub>O (0.8 eq) is added dropwise over 4 min. After stirring overnight full conversion is reached, the mixture is quenched by addition of a saturated solution of NH<sub>4</sub>Cl (2 ml). The aqueous layer is separated and extracted with Et<sub>2</sub>O (3 x 3 ml). The combined organic fractions are dried over Na<sub>2</sub>SO<sub>4</sub>, filtered and concentrated in vacuo. The residue is purified by flash column chromatography using pentane (100 %) as eluant (0.5 cm diameter and 10 cm high column).

### **Determination of the absolute configuration.**

The optically pure (S)-allylic substrate was prepared starting from 2 g of optically pure (R)-Styrene oxide and transformed into the desired allylic bromide by reported procedure. The catalysis was then performed using both (R, R) and (S, S) chiral NHC ligand. The absolute configuration of the product below could be attributed by analogy.



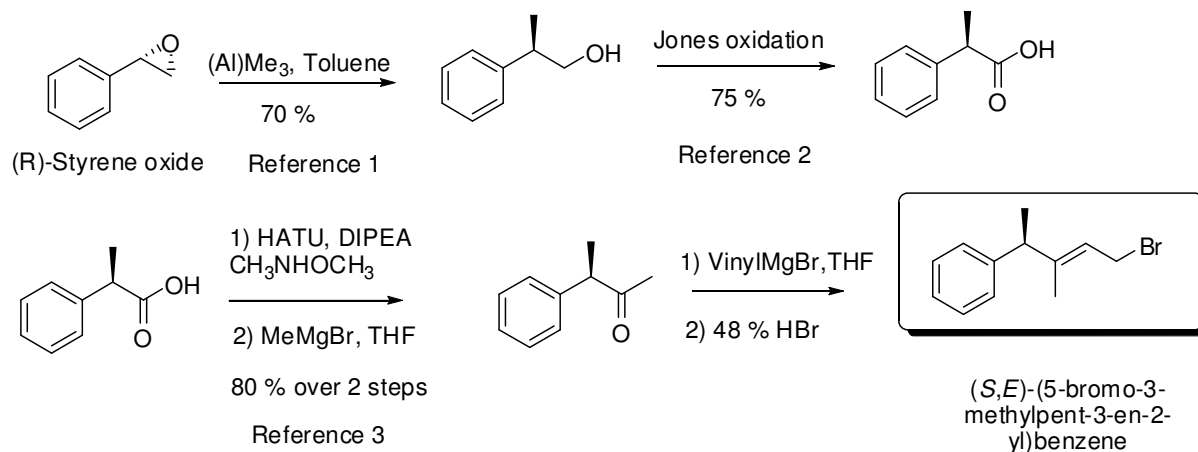

Reference 1: D. Bianchini and al, *JOC*, 53, **1988**, 5531.

Reference 2: C. Jokobsche, *Angew. Chem. Int. Ed*, 47, **2008**, 6707.

Reference 3: R. Aslanian and al, *PCT.Int.Appl*, 2012051036, **2012**.

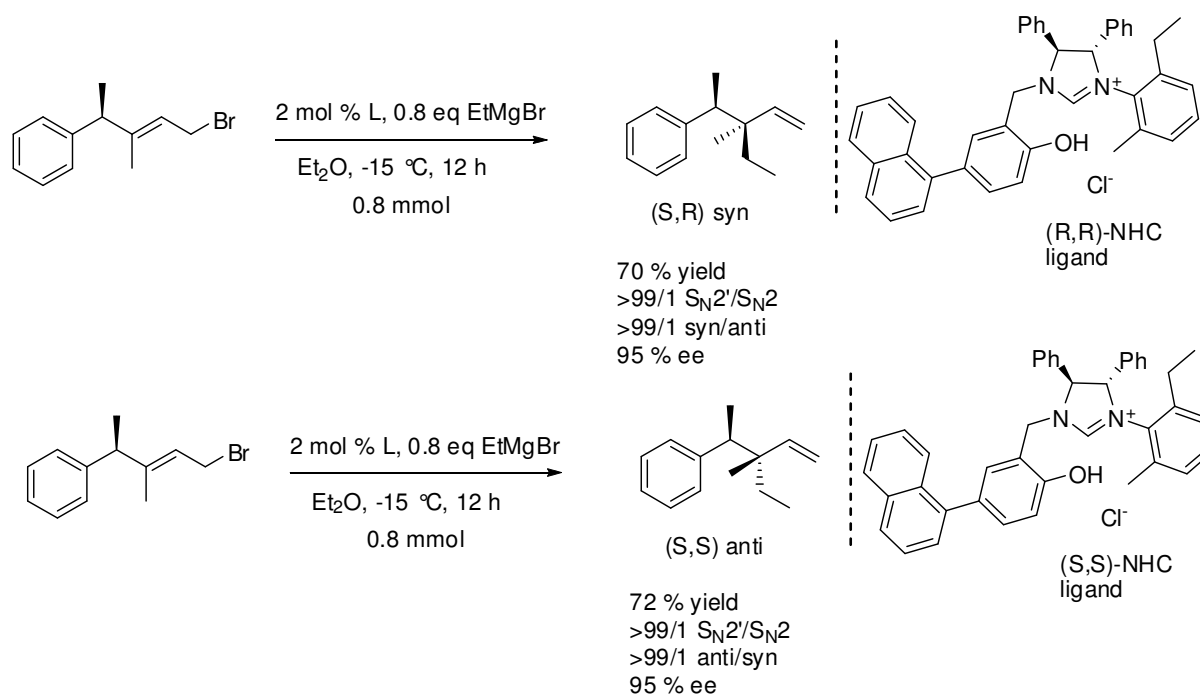

### Catalysis procedure.

In a flame-dried Schlenk, under  $\text{N}_2$  atmosphere, the racemic allylic bromide (0.8 mmol) and chiral NHC ligand (prepared from (S,S) Corey diamine see ref below) **L** (2 mol %) are suspended in 3.2 mL of dry  $\text{Et}_2\text{O}$  (crucial to respect the dilution) and cooled to  $-40^\circ\text{C}$ .  $\text{RMgBr}$  x M in  $\text{Et}_2\text{O}$  (0.8 eq) is added dropwise over 4 min. After half conversion, the mixture is quenched by addition of a saturated solution of  $\text{NH}_4\text{Cl}$  (2 ml). The aqueous layer is separated

and extracted with Et<sub>2</sub>O (3 × 3 ml). The combined organic fractions are dried over Na<sub>2</sub>SO<sub>4</sub>, filtered and concentrated in vacuo. The residue is purified by flash column chromatography using pentane (100 %) as eluant (0.5 cm diameter and 6 cm high column).

Reference: O. Jackowski, A. Alexakis, *Angew. Chem. Int. Ed.*, 50, 2010.

### Catalysis procedure for scale up.

In a flame-dried Schlenk, under N<sub>2</sub> atmosphere, the racemic allylic bromide (5 mmol) and chiral NHC ligand (prepared from (S,S) Corey diamine see ref below) **L** (2 mol %) are suspended in 20 mL of dry Et<sub>2</sub>O (crucial to respect the dilution) and cooled to -40°C. RMgBr x M in Et<sub>2</sub>O (0.8 eq) is added dropwise over 4 min. After half conversion, the mixture is quenched by addition of a saturated solution of NH<sub>4</sub>Cl (2 ml). The aqueous layer is separated and extracted with Et<sub>2</sub>O (3 × 3 ml). The combined organic fractions are dried over Na<sub>2</sub>SO<sub>4</sub>, filtered and concentrated in vacuo. The residue is purified by flash column chromatography using pentane (100 %) as eluant (2 cm diameter and 8 cm high column).

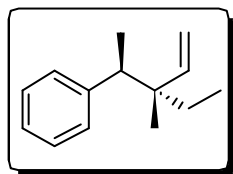

**1a.** Reaction time: 1 h. Product isolated as colourless oil in 36 % yield, >99/1 anti/syn ratio, >99/1 S<sub>N</sub>2'/S<sub>N</sub>2 ratio with 92 % ee after column chromatography on silica gel using 100 % pentane as solvent mixture.

GC: CP-CHIRASIL DEX CB: 60-0-1-170-5: t<sub>1</sub>= 55.20 min, t<sub>2</sub>=55.80

min. <sup>1</sup>H (NMR) (400 MHz, CDCl<sub>3</sub>) δ 7.40-7.25 (m, 5H) 5.80 (q, 1H, J= 10.9 Hz) 5.12 (dd, 1H, J= 1.5 Hz and J=10.8 Hz) 4.93 (d, J=1.59 Hz and J=17.5 Hz) 1.50-1.40 (m, 2H) 1.25 (d, 3H, J= 6.9 Hz) 0.80 (s, 3H) 0.65 (t, 3H, J=7.5 Hz). <sup>13</sup>C NMR (75 MHz, CDCl<sub>3</sub>) δ 145.7, 144.3, 129.4, 127.4, 125.9, 112.4, 48.3, 43.2, 31.6, 17.9, 16.1, 8.5. HRMS (EI + mode) m/z expected: 242,2035 observed: 242,2037. [α]<sub>D</sub> = +13.2 (c 1.33, CHCl<sub>3</sub>).

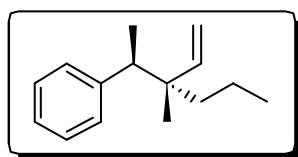

**1b.** Reaction time: 1h 30. Product isolated as colourless oil in 32 % yield, >99/1 anti/syn ratio, >99/1 S<sub>N</sub>2'/S<sub>N</sub>2 ratio with 86 % ee after column chromatography on silica gel using 100 % pentane as solvent mixture.

GC: HYDRODEX B-6 TBDMS: 60-0-1-170-5: t<sub>1</sub>=52.80 min, t<sub>2</sub>= 53.40 min. <sup>1</sup>H (NMR) (400 MHz, CDCl<sub>3</sub>) δ 7.40-7.25 (m, 5H) 5.80 (q, 1H, J= 10.9 Hz) 5.12 (dd, 1H, J= 1.5 Hz and J=10.8 Hz) 4.93 (d, J=1.5 Hz and J=17.5 Hz) 1.36-1.25 (m, 7H) 0.80-0.70

(m, 6H).  $^{13}\text{C}$  NMR (75 MHz,  $\text{CDCl}_3$ )  $\delta$  145.7, 144.7, 129.4, 127.4, 125.9, 112.9, 48.6, 43.1, 41.8, 18.6, 17.4, 16.2, 14.9. HRMS (EI + mode) m/z expected: 202,1722 observed: 202,1723.  $[\alpha] = +8.1$  (c 1.33,  $\text{CHCl}_3$ ).

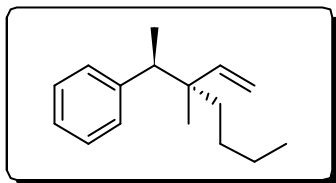

**1c.** Reaction time: 1h 30. Product isolated as colourless oil in 35 % yield, >99/1 anti/syn ratio, >99/1  $S_N2'/S_N2$  ratio with 84 % ee after column chromatography on silica gel using 100 % pentane as solvent mixture. GC: CP-CHIRASIL DEX CB: 60-0-1-170-5: t1= 68.8 min, t2=69.40 min  $^1\text{H}$  (NMR) (400 MHz,  $\text{CDCl}_3$ )  $\delta$  7.40- 7.10 (m,5H) 5.75 (q, 1H, J=10.9 Hz) 5.15 (dd, 1H, J= 1.55 Hz and J= 10.8 Hz) 2.70 (q, 1H, J= 7.2 Hz) 1.45-1.20 (m, 9 H) 0.80-0.70 (m, 6H).  $^{13}\text{C}$  NMR (75 MHz,  $\text{CDCl}_3$ )  $\delta$  145.7, 144.3, 129.4, 127.4, 125.9, 112.4, 48.6, 43, 39.2, 26.4, 23.5, 18.7, 16.2, 14.2. HRMS (EI + mode) m/z expected: 216,1878 observed: 216,1877.  $[\alpha] = +9.6$  (c 1.33,  $\text{CHCl}_3$ ).

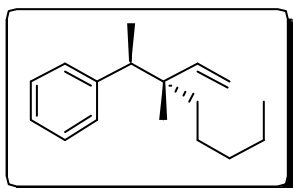

**1d.** Reaction time: 1h 30. Product isolated as colourless oil in 36 % yield, >99/1 anti/syn ratio, >99/1  $S_N2'/S_N2$  ratio with 91 % ee after column chromatography on silica gel using 100 % pentane as solvent mixture. GC: CP-CHIRASIL DEX CB: 60-0-1-170-5: t1= 78.90 min, t2=79.30 min.  $^1\text{H}$  (NMR) (400 MHz,  $\text{CDCl}_3$ )  $\delta$  7.40-7.20 (m, 5H) 5.80 (q, 1H, J= 10.9 Hz) 5.12 (d, 1H, J=10.90 Hz) 4.92 (d, J=17.5 Hz) 2.70 (q, 1H, J= 7.2 Hz) 1.35-1.25 (m, 12H) 0.80 (t, 3H, J=7.4 Hz) 0.75 (t, 3H, J=7.5 Hz).  $^{13}\text{C}$  NMR (75 MHz,  $\text{CDCl}_3$ )  $\delta$  145.7, 144.3, 129.4, 127.4, 125.9, 112.9, 48.6, 43.1, 39.4, 32.8, 23.9, 22.7, 18.7, 16.2, 14.1. HRMS (EI + mode) m/z expected: 230,2035 observed: 230,2037.  $[\alpha] = +10.6$  (c 1.33,  $\text{CHCl}_3$ ).

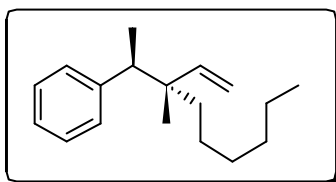

**1e.** Reaction time: 1h 30. Product isolated as colourless oil in 36 % yield, >99/1 anti/syn ratio, >99/1  $S_N2'/S_N2$  ratio with 90 % ee after column chromatography on silica gel using 100 % pentane as solvent mixture. GC: HYDRODEX B-6 TBDMS: 60-0-1-170-5: t1=88.10 min, t2= 88.50 min.  $^1\text{H}$  (NMR) (400 MHz,  $\text{CDCl}_3$ )  $\delta$  7.40-7.20 (m, 5H) 5.80 (q, 1H, J= 10.9 Hz) 5.12 (dd, 1H, J= 1.5 Hz and J=10.8 Hz) 4.93 (d, J=1.5 Hz and J=17.5 Hz) 2.70 (q, 1H, J= 7.2 Hz) 1.40-1.32 (m, 15H) 0.80-0.70 (m, 6H).  $^{13}\text{C}$  NMR (75 MHz,  $\text{CDCl}_3$ )  $\delta$  145.7, 144.3, 129.4, 127.4, 125.9, 112.9, 48.6, 43, 39.5, 31.9, 30.2, 24.2, 22.7, 18.7, 16.2,

14.1. HRMS (EI + mode) m/z expected: 244,2191 observed: 244,2192.  $[\alpha] = +10.1$  (c 1.33,  $\text{CHCl}_3$ ).

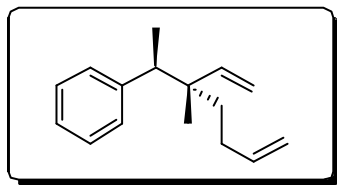

**1f.** Reaction time: 1h 30. Product isolated as colourless oil in 36 % yield, >99/1 anti/syn ratio, >99/1  $S_N2'/S_N2$  ratio with 86 % ee after column chromatography on silica gel using 100 % pentane as solvent mixture. GC: HYDRODEX B-6 TBDMS: 60-0-1-170-5: t1=78.60 min, t2= 79.10 min.  $^1\text{H}$  (NMR) (400 MHz,  $\text{CDCl}_3$ )  $\delta$  7.40-7.10 (m, 5H) 5.84-5.78 (m, 2H) 5.14 (dd, 1H, J= 1.5 Hz and J=10.9 Hz) 5.05-4.95 (m, 3H) 2.70 (q, 1H, J= 7.2 Hz) 2.10-2 (m, 2H) 1.60-1.50 (m, 3H) 1.25 (s, 3H) 1.20 (s, 3H) 0.75 (s, 3H).  $^{13}\text{C}$  NMR (75 MHz,  $\text{CDCl}_3$ )  $\delta$  145.3, 144, 139.6, 129.4, 127.5, 126, 113.9, 113.8, 48.8, 43, 38.6, 28.8, 18.3, 16.2. HRMS (EI + mode) m/z expected: 214,1722 observed: 214,1724.  $[\alpha] = +8.2$  (c 1.33,  $\text{CHCl}_3$ ).

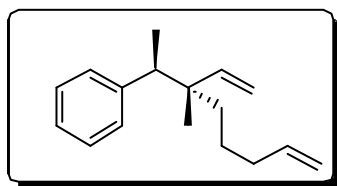

**1g.** Reaction time: 1h 45. Product isolated as colourless oil in 34 % yield, >99/1 anti/syn ratio, >99/1  $S_N2'/S_N2$  ratio with 84 % ee after column chromatography on silica gel using 100 % pentane as solvent mixture. GC: HYDRODEX B-6 TBDMS: 60-0-1-170-5: t1=75.50 min, t2= 76.10 min.  $^1\text{H}$  (NMR) (400 MHz,  $\text{CDCl}_3$ )  $\delta$  7.40-7.10 (m, 5H) 5.85-5.78 (m, 2H) 5.10 (dd, 1H, J= 1.5 Hz and J=10.9 Hz) 4.97 (q, 2H, J=19.2 Hz) 4.90 (q, 1H, J= 17.6 Hz) 2.70 (q, 1H, J= 7.2 Hz) 2 (d, 2H, J=7 Hz) 1.35-1.25 (m, 7H) 0.75 (s, 3H).  $^{13}\text{C}$  NMR (75 MHz,  $\text{CDCl}_3$ )  $\delta$  145.3, 139, 129.4, 127.4, 125.9, 114.2, 113.1, 48.7, 38.9, 34.5, 23.7, 18.7, 16.2. HRMS (EI + mode) m/z expected: 228,1878 observed: 228,1880.  $[\alpha] = +8.6$  (c 1.33,  $\text{CHCl}_3$ ).

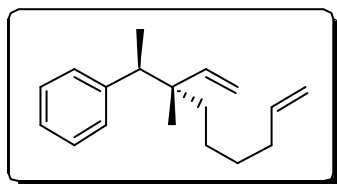

**1h.** Reaction time: 1h 30. Product isolated as colourless oil in 37 % yield, >99/1 anti/syn ratio, >99/1  $S_N2'/S_N2$  ratio with 86 % ee after column chromatography on silica gel using 100 % pentane as solvent mixture. GC: HYDRODEX B-6 TBDMS: 60-0-1-170-5: t1=88 min, t2= 88.40 min.  $^1\text{H}$  (NMR) (400 MHz,  $\text{CDCl}_3$ )  $\delta$  7.40-7.10 (m, 5H) 5.86-5.78 (m, 2H) 5.10 (dd, 1H, J= 1.5 Hz and J=10.9 Hz) 4.97 (q, 2H, J=19.2 Hz) 4.90 (q, 1H, J= 17.6 Hz) 2.70 (q, 1H, J= 7.20 Hz) 2.10-2 (m, 2H) 1.40-1.25 (m, 9H) 0.75 (s, 3H).  $^{13}\text{C}$  NMR (75 MHz,  $\text{CDCl}_3$ )  $\delta$  145.6, 144.2, 139.1, 129.4, 128.9, 128, 127.9, 127.4, 125.9, 114.1, 113, 48.6,

43, 39.2, 33.8, 29.8, 25.6, 23.7, 18.7, 16.2. HRMS (EI + mode) m:z expected: 242,2035 observed: 242,2033.  $[\alpha] = +7.7$  (c 1.33, CHCl<sub>3</sub>).

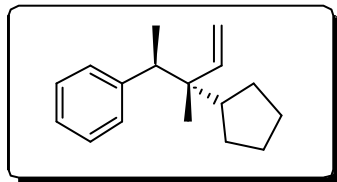

**1i.** Reaction time: 4h 30. Product isolated as colourless oil in 35 % yield, >99/1 anti/syn ratio, >99/1 S<sub>N</sub>2'/S<sub>N</sub>2 ratio with 22 % ee after column chromatography on silica gel using 100 % pentane as solvent mixture. <sup>1</sup>H (NMR) (400 MHz, CDCl<sub>3</sub>) δ 7.4-7.1 (m, 5H) 6.9 (m, 2H) 5.90 (q, 1H, J= 10,9 Hz ) 5.20 (d, 1H, J=1.7 Hz and J=10.9 Hz ) 4.90 (d, 1H, J= 1,60Hz and J=17,5 Hz) 2.86 (q, 1H, J= 7.2 Hz) 1.90-1.50 (m, 8H) 1.30 (s, 6H) 1-0.9 (m, 3H). <sup>13</sup>C NMR (75 MHz, CDCl<sub>3</sub>) δ 144.7, 143.6, 129.3, 127.4, 125.9, 114, 46.6, 45.8, 45.3, 27.2, 25.9, 25.8, 16.7, 16.2. HRMS (EI + mode) m:z expected: 228,1878 observed: 228,1881.  $[\alpha] = +1.6$  (c 1.33, CHCl<sub>3</sub>).

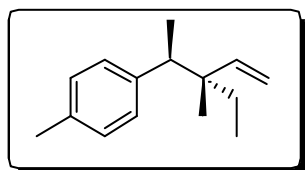

**1j.** Reaction time: 45 min. Product isolated as colourless oil in 32 % yield, >99/1 anti/syn ratio, >99/1 S<sub>N</sub>2'/S<sub>N</sub>2 ratio with 86 % ee after column chromatography on silica gel using 100 % pentane as solvent mixture. GC: CP-CHIRASIL DEX CB: 60-0-1-170-5: t<sub>1</sub>= 64.8 min, t<sub>2</sub>=65.50 min. <sup>1</sup>H (NMR) (400 MHz, CDCl<sub>3</sub>) δ 7.30-7.20 (s, 4H) 5.70 (q, 1H, J= 10.8 Hz) 5.11 (dd, 1H, J= 1.5 Hz and J=10.9 Hz) 4.90 (dd, 1H, J=1.5 Hz and J=17.5 Hz) 2.70 (q, 1H, J= 7.3 Hz) 2.35 (s, 3H) 1.5-1.4 (m, 3H) 1.25 (d, 3H, J=7.3 Hz) 0.80 (s, 3H) 0.70 (t, 3H, J=7.4 Hz). <sup>13</sup>C NMR (75 MHz, CDCl<sub>3</sub>) δ 145.6, 141.2, 135.3, 129.3, 126.1, 113.1, 48, 43.3, 31.7, 21 17.7, 16.3, 8.5. HRMS (EI + mode) m:z expected: 202,1722 observed: 202,1723.  $[\alpha] = +8.6$  (c 1.33, CHCl<sub>3</sub>).

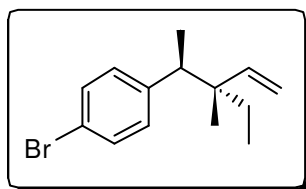

**1k.** Reaction time: 45 min. Product isolated as colourless oil in 34 % yield, >99/1 anti/syn ratio, >99/1 S<sub>N</sub>2'/S<sub>N</sub>2 ratio with 92 % ee after column chromatography on silica gel using 100 % pentane as solvent mixture. GC: HYDRODEX B-6 TBDMS: 60-0-1-170-5: t<sub>1</sub>=86.60 min, t<sub>2</sub>= 87.60 min. <sup>1</sup>H (NMR) (400 MHz, CDCl<sub>3</sub>) δ 7.30 (d, 2H, J=7.7 Hz ) 7 (d, 2H, J=7.6 Hz) 5.80 (q, 1H, J= 10.9 Hz) 5.12 (dd, 1H, J= 1.5 Hz and J=10.8 Hz) 4.93 (d, J=1.6 Hz and J=17.5 Hz) 2.70 (q, 1H, J= 7.2 Hz) 1.70-1.60 (m, 5H) 0.80 (s, 3H) 0.70 (t, 3H, J=7.5 Hz). <sup>13</sup>C NMR (75 MHz, CDCl<sub>3</sub>) δ 144.8, 143.3, 131, 130.5, 119.7, 113.7, 48, 43.1, 31.6, 18,

16.1, 8.5. HRMS (EI + mode) m/z expected: 266,0670 observed: 266,0669.  $[\alpha] = +11.9$  (c 1.33, CHCl<sub>3</sub>).

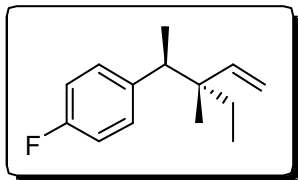

**1l.** Reaction time: 40 min. Product isolated as colourless oil in 35 % yield, >99/1 anti/syn ratio, 100/0 S<sub>N</sub>2'/S<sub>N</sub>2 ratio with 94 % ee after column chromatography on silica gel using 100 % pentane as solvent mixture. GC: HYDRODEX B-6 TBDMS: 60-0-1-170-5: t<sub>1</sub>=51.40 min, t<sub>2</sub>= 52.70 min. <sup>1</sup>H (NMR) (400 MHz, CDCl<sub>3</sub>) δ 7.20-7.30 (m, 2H) 7-6.90 (m, 2H) 5.80 (q, 1H, J= 10.9 Hz) 5.12 (dd, 1H, J= 1.5 Hz and J=10.8 Hz) 4.93 (d, J=1.5 Hz and J=17.5 Hz) 2.70 (q, 1H, J= 7.2 Hz) 1.45-1.35 (m, 2H) 1.25 (d, 3H, J= 6.8 Hz) 0.80 (s, 3H) 0.65 (t, 3H, J=7.5 Hz). <sup>13</sup>C NMR (75 MHz, CDCl<sub>3</sub>) δ 162.5, 160.1, 145, 139.7, 130.6, 114.9, 114.7, 114.2 114, 113.5, 47.2, 43.2, 31.6, 17.9, 16.3, 8.5. HRMS (EI + mode) m/z expected: 206,1471 observed: 206,1472.  $[\alpha] = +12.6$  (c 1.33, CHCl<sub>3</sub>).

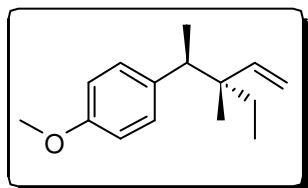

**1m.** Reaction time: 50 min. Product isolated as colourless oil in 38 % yield, >99/1 anti/syn ratio, 100/0 S<sub>N</sub>2'/S<sub>N</sub>2 ratio with 78 % ee after column chromatography on silica gel using 100 % pentane as solvent mixture. GC: HYDRODEX B-6 TBDMS: 60-0-1-170-5: t<sub>1</sub>=79.20 min, t<sub>2</sub>= 79.80 min. <sup>1</sup>H (NMR) (400 MHz, CDCl<sub>3</sub>) δ 7.20-7.30 (m, 2H) 6.90-6.80 (m, 2H) 5.80 (q, 1H, J= 10.9 Hz) 5.12 (dd, 1H, J= 1.5 Hz and J=10.8 Hz) 4.93 (d, J=1.6 Hz and J=17.5 Hz) 3.82 (s, 3H) 2.70 (q, 1H, J= 7.2 Hz) 1.70-1.60 (m, 5H) 0.80 (s, 3H) 0.70 (t, 3H, J=7.5 Hz). <sup>13</sup>C NMR (75 MHz, CDCl<sub>3</sub>) δ 157.8, 145.3, 136.4, 130.5, 128.3, 113.4, 113.1, 112.7, 55.2, 47.6, 43.4, 31.6, 17.7, 16.4, 8.6. HRMS (EI + mode) m/z expected: 218,1671 observed: 218,1673.  $[\alpha] = +4.5$  (c 1.33, CHCl<sub>3</sub>).

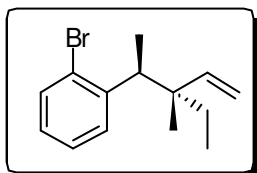

**1n.** Reaction time: 50 min. Product isolated as colourless oil in 32 % yield, >99/1 anti/syn ratio, >99/1 S<sub>N</sub>2'/S<sub>N</sub>2 ratio with 84 % ee after column chromatography on silica gel using 100 % pentane as solvent mixture. GC: HYDRODEX B-6 TBDMS: 60-0-1-170-5: t<sub>1</sub>=70.70 min, t<sub>2</sub>= 71.70 min. <sup>1</sup>H (NMR) (400 MHz, CDCl<sub>3</sub>) δ 7.50 (dd, 1H, J= 1.3 Hz and J= 7.9 Hz) 7.25 (m, 2H) 7-6.90 (m, 1H) 5.80 (q, 1H, J= 10.9 Hz) 5.12 (dd, 1H, J= 1.5 Hz and J=10.8 Hz) 4.93 (d, J=1.5 Hz and J=17.50 Hz) 3.4 (q, 1H, J= 7.17 Hz) 1.5-1.4 (m, 2H) 1.25 (d, 3H, J= 6.9 Hz)

0.80 (s, 3H) 0.65 (t, 3H, J=7.5 Hz).  $^{13}\text{C}$  NMR (75 MHz,  $\text{CDCl}_3$ )  $\delta$  144.2, 144, 132.7, 129.8, 127.6, 126.6, 126.3, 114, 45.2, 31.3, 17.8, 16.5, 8.5. HRMS (EI + mode) m/z expected: 266,0670 observed: 266,0672.  $[\alpha] = +8.1$  (c 1.33,  $\text{CHCl}_3$ ).

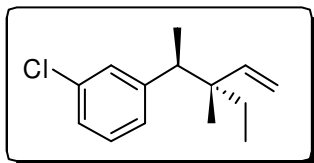

**1o.** Reaction time: 45 min. Product isolated as colourless oil in 31 % yield, >99/1 anti/syn ratio, >99/1  $\text{S}_{\text{N}}2'/\text{S}_{\text{N}}2$  ratio with 92 % ee after column chromatography on silica gel using 100 % pentane as solvent mixture. GC: HYDRODEX B-6 TBDMS: 60-0-1-170-5: t<sub>1</sub>=68.90 min, t<sub>2</sub>= 69.40 min.  $^1\text{H}$  (NMR) (400 MHz,  $\text{CDCl}_3$ )  $\delta$  7.40-7.30 (m, 4H) 7.20-7.10 (m, 1H) 5.80 (q, 1H, J= 10.9 Hz) 5.12 (dd, 1H, J= 1.5 Hz and J=10.9 Hz) 4.93 (d, J=1.59 Hz and J=17.5 Hz) 2.70 (q, 1H, J= 7.2 Hz) 1.70-1.60 (m, 5H) 0.80 (s, 3H) 0.70 (t, 3H, J=7.5 Hz).  $^{13}\text{C}$  NMR (75 MHz,  $\text{CDCl}_3$ )  $\delta$  146.4, 144.8, 133.2, 129.3, 128.6, 127.5, 126.9, 113.7, 48.3, 43.2, 31.6, 17.9, 16.1, 8.5. HRMS (EI + mode) m/z expected: 222,1175 observed: 222,1175.  $[\alpha] = +11.3$  (c 1.33,  $\text{CHCl}_3$ ).

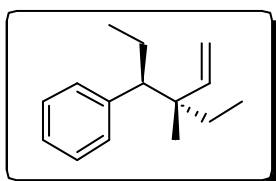

**1p.** Reaction time: 50 min. Product isolated as colourless oil in 36 % yield, >99/1 anti/syn ratio, >99/1  $\text{S}_{\text{N}}2'/\text{S}_{\text{N}}2$  ratio with 82 % ee after column chromatography on silica gel using 100 % pentane as solvent mixture. GC: CP-CHIRASIL DEX CB: 60-0-1-170-5: t<sub>1</sub>= 57 min, t<sub>2</sub>=57.50 min.  $^1\text{H}$  (NMR) (400 MHz,  $\text{CDCl}_3$ )  $\delta$  7.4-7.1 (m, 5H) 5.66 (q, 1H, J=10.9 Hz) 5 (dd, 1H, J= 1.60 Hz and J=10.9 Hz ) 4.80 (dd, 1H, J=1.6 Hz and J=17.6 Hz ) 2.24 (dd, 1H, J= 2.8 Hz and J=12 Hz) 1.70-1.50 (m, 2H) 1.25-1.10 (m, 2H) 0.75 (s, 3H) 0.70 (t, 3H, J=7.4 Hz) 0.6 (t, 3H, J=7.4 Hz).  $^{13}\text{C}$  NMR (75 MHz,  $\text{CDCl}_3$ )  $\delta$  146.1, 142.1, 129.9, 127.9, 127.8, 127.4, 125.9, 113.2, 57.4, 43.7, 32.2, 22.7, 17.7, 13.1, 8.5. HRMS (EI + mode) m/z expected: 202,1722 observed: 202,1720.  $[\alpha] = +7.6$  (c 1.33,  $\text{CHCl}_3$ ).

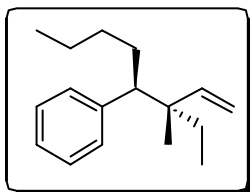

**1q.** Reaction time: 1h. Product isolated as colourless oil in 35 % yield, >99/1 anti/syn ratio, >99/1  $\text{S}_{\text{N}}2'/\text{S}_{\text{N}}2$  ratio with 82 % ee after column chromatography on silica gel using 100 % pentane as solvent mixture. GC: HYDRODEX B-6 TBDMS: 60-0-1-170-5: t<sub>1</sub>=66.20 min, t<sub>2</sub>= 66.60 min.  $^1\text{H}$  (NMR) (400 MHz,  $\text{CDCl}_3$ )  $\delta$  7.40-7.10 (m, 5H) 5.75 (q, 1H, J= 10.9 Hz) 5.20 (dd, 1H, J= 1.5 Hz and J=10.8 Hz) 4.90 (dd, 1H, J=1.5 Hz and J=17.5 Hz) 2.40 (dd, 1H, J= 2.8 Hz and J=11.9 Hz) 1.80-1.70 (m, 2H) 1.40-1.30 (m, 6H) 1.1-1 (m, 3H) 0.90 (s, 3H) 0.80

(t, 3H, J=7.3 Hz) 0.70 (t, 3H, J=7.5 Hz).  $^{13}\text{C}$  NMR (75 MHz,  $\text{CDCl}_3$ )  $\delta$  146.1, 142.5, 127.4, 125.9, 113.2, 55.2, 43.7, 32.2, 30.6, 29.6, 22.7, 17.8, 14, 8.5. HRMS (EI + mode) m/z expected: 230,2035 observed: 230,2036.  $[\alpha] = +6.8$  (c 1.33,  $\text{CHCl}_3$ ).

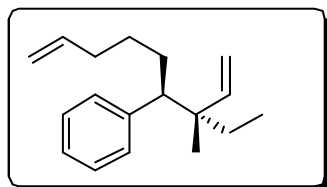

**1s.** Reaction time: 45 min. Product isolated as a colourless oil in 37 % yield, >99/1 anti/syn ratio, >99/1  $S_N2'/S_N2$  ratio with 90 % ee after column chromatography on silica gel using 100 % pentane as solvent mixture. GC: HYDRODEX B-6 TBDMS: 60-0-1-170-5: t1=78.1 min, t2=78.4 min.  $^1\text{H}$  NMR (400 MHz,  $\text{CDCl}_3$ )  $\delta$  7.40-7.20 (m, 5H) 5.84-5.75 (m, 2H) 5.73 (q, 1H, J= 6.7 Hz) 5.73 (q, 1H, J= 6.7 Hz) 5.82-5.70 (m, 1H) 5.16 (dd, 1H, J= 1.3 Hz and J= 10.8 Hz) 4.94 (dd, 1H, J= 1.5 Hz and J= 11.5 Hz) 4.92-4.80 (m, 2H) 2.49 (dd, 1H, J= 2.1 Hz and J= 11.5 Hz) 2-1.7 (m, 4H) 1.30-1.20 (m, 3H) 1 (dd, 1H, J= 3.3 Hz and J= 6.6 Hz) 0.88 (s, 3H) 0.74 (t, 3H, J= 7.4 Hz).  $^{13}\text{C}$  NMR (101 MHz,  $\text{CDCl}_3$ )  $\delta$  146, 142.2, 138.9, 128, 127.7, 127.5, 125.9, 114.1, 113.3, 55.1, 43.6, 33.8, 32.2, 29.3, 27.6, 17.7, 8.4. HRMS (EI + mode) m/z expected: 242,2035 observed: 242,2037.  $[\alpha] = +11.1$  (c 1.33,  $\text{CHCl}_3$ ).

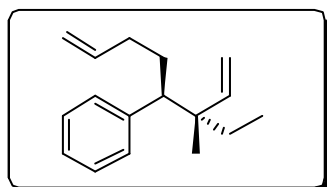

**1t.** Reaction time: 45 min. Product isolated as colourless oil in 34 % yield, >99/1 anti/syn ratio, >99/1  $S_N2'/S_N2$  ratio with 91 % ee after column chromatography on silica gel using 100 % pentane as solvent mixture. GC: HYDRODEX B-6 TBDMS: 60-0-1-170-5: t1=66.5 min, t2=66.8 min.  $^1\text{H}$  NMR (400 MHz,  $\text{CDCl}_3$ )  $\delta$  7.40-7.20 (m, 5H) 5.82-5.75 (m, 2H) 5.73 (q, 1H, J= 6.7 Hz) 5.70-5.60 (m, 1H) 5.16 (dd, 1H, J= 1.3 Hz and J= 10.8 Hz) 4.94 (dd, 1H, J= 1.5 Hz and J= 11.5 Hz) 4.92 (m, 2H) 2.49 (dd, 1H, J= 2.1 Hz and J= 11.5 Hz) 1.90-1.82 (m, 4H) 1.34-1.19 (m, 2H) 0.88 (s, 3H) 0.74 (t, 3H, J= 7.4 Hz).  $^{13}\text{C}$  NMR (101 MHz,  $\text{CDCl}_3$ )  $\delta$  145.9, 141.9, 138.9, 128, 127.5, 126, 114.3, 113.3, 54.4, 43.5, 32.3, 32.2, 29.1, 17.7, 8.4. HRMS (EI + mode) m/z expected: 228,2878 observed: 228,2880.  $[\alpha] = +12.2$  (c 1.33,  $\text{CHCl}_3$ ).

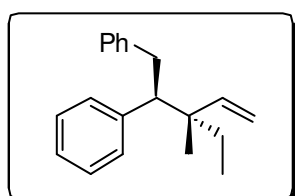

**1u.** Reaction time: 1h. Product isolated as colourless oil in 35 % yield, >99/1 anti/syn ratio, >99/1  $S_N2'/S_N2$  ratio with 92 % ee after



column chromatography on silica gel using 100 % pentane as solvent mixture. SFC: AZ-column with 2 % MeOH and 98 % CO<sub>2</sub>: t<sub>1</sub>= 4.20 min, t<sub>2</sub>= 4.40 min. <sup>1</sup>H (NMR) (400 MHz, CDCl<sub>3</sub>) δ 7.40-7.10 (m, 8H) 7-6.90 (m, 2H) 5.90 (q, 1H, J= 10,9 Hz ) 5.30 (d, 1H, J=10.8 Hz ) 5.10 (d, 1H, J= 17,5 Hz) 3.20 (d, 1H, J= 13.3 Hz) 2.90 (t, 1H, J= 11.8 Hz) 2.70 (d, 1H, J= 11.7 Hz ) 1.60-1.50 (m, 3H) 1 (s, 3H) 0.80 (t, 3H, J= 7.5 Hz). <sup>13</sup>C NMR (75 MHz, CDCl<sub>3</sub>) δ 146, 141.8, 141.7, 130.2, 128.8, 127.9, 127.8, 127.4, 126 1, 125.3, 114, 57.6, 44.1, 36.8, 32.3, 17.6, 8.6. HRMS (EI + mode) m:z expected: 264,1878 observed: 264,1879. [α] = +11.6 (c 1.33, CHCl<sub>3</sub>).

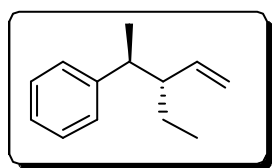

**1v.** Reaction time: 12 h. Product isolated as colourless oil in 31 % yield, 8.5/1 anti/syn ratio, >99/1 S<sub>N</sub>2'/S<sub>N</sub>2 ratio with 85 % ee after column chromatography on silica gel using 100 % pentane as solvent mixture. GC: CP-CHIRASIL DEX CB: 60-0-1-170-5: t<sub>1</sub>= 41.90 min, t<sub>2</sub>=43.20 min. <sup>1</sup>H NMR (300 MHz, CDCl<sub>3</sub>) δ 7.32-7.18 (m, 5H) 5.58 (quin, 1H, J= 9.5 Hz) 5.12 (d, 1H, J=10.3 Hz) 5.09 (d, 1H, J=17.2 Hz) 2.62 (quin, 1H, J=6.2 Hz) 2.09 (m, 1H) 1.20 (d, 3H, J=7.1 Hz) 1.08-0.95 (m, 2H) 0.77 (t, 3H, J=7.5 Hz). <sup>13</sup>C NMR (101 MHz, CDCl<sub>3</sub>) δ 146.6, 141.2, 128.2, 127.7, 125.8, 115.9, 53.10, 44, 25.4, 20.1, 11.8. HRMS (EI + mode) m:z expected: 174,1409 observed: 174,1410. [α] = +7.3 (c 1.33, CHCl<sub>3</sub>).

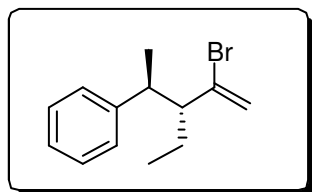

**1w.** Reaction time: 12 h. Product isolated as colourless oil in 36 % yield, >99/1 anti/syn ratio, >99/1 S<sub>N</sub>2'/S<sub>N</sub>2 ratio with 85 % ee after column chromatography on silica gel using 100 % pentane as solvent mixture. ee determined after lithium/bromide exchange and quench with water. GC: CP-CHIRASIL DEX CB: 60-0-1-170-5: t<sub>1</sub>= 41.7 min, t<sub>2</sub>= 42.9 min. <sup>1</sup>H (NMR) (400 MHz, CDCl<sub>3</sub>) δ 7.30-7.10 (m, 5H) 5.75 (s, 1H) 5.60 (s, 1H) 2.85-2.75 (m, 1H) 2 (td, 1H, J= 3.4 Hz and J=10.6 Hz) 1.35-1.25 (m, 4H) 1.20-1.10 (m, 1H) 0.75 (t, 3H, J= 7.4 Hz). <sup>13</sup>C NMR (75 MHz, CDCl<sub>3</sub>) δ 145.5, 138.6, 128.4, 127.8, 126.2, 118.8, 58.4, 43, 24, 21.1, 11.9. HRMS (EI + mode) m:z expected: 252.0514 observed: 252.0512 .

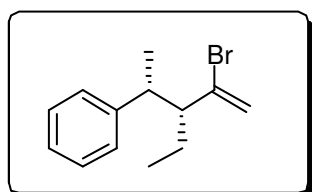

**1x.** Reaction time: 12 h. Product isolated as colourless oil in 36 % yield, >99/1 syn/anti ratio, >99/1 S<sub>N</sub>2'/S<sub>N</sub>2 ratio with 77 % ee after column chromatography on silica gel using 100 % pentane as solvent mixture. ee determined after lithium/bromide exchange and quench with water. GC: CP-CHIRASIL DEX CB: 60-0-1-170-5: t<sub>1</sub>= 42.6 min, t<sub>2</sub>= 43.4 min.

$^1\text{H}$  (NMR) (400 MHz,  $\text{CDCl}_3$ )  $\delta$  7.30-7.10 (m, 5H) 5.25 (s, 1H) 5.22 (s, 1H) 3-2.90 (m, 1H) 2.25 (td, 1H,  $J=3.4$  Hz and  $J=10.6$  Hz) 1.76-1.31 (m, 5H) 0.90 (t, 3H,  $J=7.4$  Hz).  $^{13}\text{C}$  NMR (75 MHz,  $\text{CDCl}_3$ )  $\delta$  146, 138.1, 128.6, 128, 127.5, 126.8, 118.5, 58.3, 42.7, 22.8, 19, 12. HRMS (EI + mode) m/z expected: 252.0514 observed: 252.0512 .

### Application.

Into a conditioned Young Valve with Grubbs second generation catalyst (5 mol %) the desired catalysis adduct (0.2 mmol) is dissolved into 1 mL of dry and degassed dichloromethane. The flask is sealed and heated at reflux for 24 h. After cooling to room temperature the solvent is evaporated in vacuo and the crude material is purified via flash column chromatography using pentane (100 %) as eluant (0.5 cm diameter and 6 cm high column).

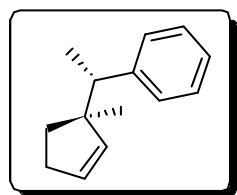

**2a.** Product isolated as colourless oil in 68 % yield, >99/1 anti/syn ratio with 82 % ee after column chromatography on silica gel using 100 % pentane as solvent.  $^1\text{H}$  (NMR) (400 MHz,  $\text{CDCl}_3$ )  $\delta$  7.40-7.10 (m, 5H) 5.75-5.65 (m, 2H) 2.60 (q, 1H,  $J=7.10$  Hz) 2.35-2.25 (m, 2H) 1.60-1.50 (m, 1H) 1.25 (d, 3H,  $J=7.1$  Hz) 1 (s, 3H).  $^{13}\text{C}$  NMR (75 MHz,  $\text{CDCl}_3$ )  $\delta$  145.2, 138.3, 129.4, 128.8, 128.7, 127.7, 127.6, 125.8, 52.6, 48.6, 35.9, 32, 25.5, 16.4. HRMS (EI + mode) m/z expected: 186,1409 observed: 186,1410.  $[\alpha] = +7.8$  (c 1.33,  $\text{CHCl}_3$ ).

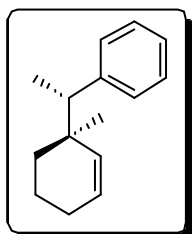

**2b.** Product isolated as colourless oil in 72 % yield, >99/1 anti/syn ratio with 84 % ee after column chromatography on silica gel using 100 % pentane as solvent.  $^1\text{H}$  (NMR) (400 MHz,  $\text{CDCl}_3$ )  $\delta$  7.40-7.20 (m, 5H) 5.80-5.70 (m, 2H) 2.8 (q, 1H,  $J=7.1$  Hz) 1.90 (m, 2H) 1.70-1.60 (m, 4H) 1.30 (d, 3H,  $J=7.1$  Hz) 0.90 (s, 3H).  $^{13}\text{C}$  NMR (75 MHz,  $\text{CDCl}_3$ )  $\delta$  144.7, 135.4, 129.2, 127.5, 125.9, 125.8, 48.2, 37.5, 33.7, 25.2, 24.4, 19.1, 15.6. HRMS (EI + mode) m/z expected: 200,1565 observed: 200,1566.  $[\alpha] = +8.3$  (c 1.33,  $\text{CHCl}_3$ ).

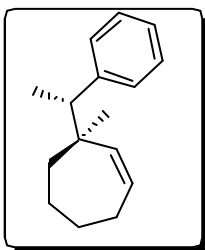

**2c.** Product isolated as colourless oil in 67 % yield, >99/1 anti/syn ratio with 90 % ee after column chromatography on silica gel using 100 % pentane as solvent.  $^1\text{H}$  (NMR) (400 MHz,  $\text{CDCl}_3$ )  $\delta$  7.40-7.20 (m, 5H) 5.80-5.70 (m, 2H) 2.8 (q, 1H,  $J=7.10$  Hz) 1.90-1.60 (m, 8H) 1.30 (d, 3H,  $J=7.1$  Hz) 0.90 (s, 3H).  $^{13}\text{C}$  NMR (75 MHz,  $\text{CDCl}_3$ )  $\delta$  144.7, 135.4, 129.2, 127.5, 125.9, 125.8, 48.2, 37.5, 33.7, 28, 25.2, 24.4, 19.1, 15.6. HRMS (EI + mode) m:z expected: 214,1722 observed: 214,1722.  $[\alpha] = +11.2$  (c 1.33,  $\text{CHCl}_3$ ).

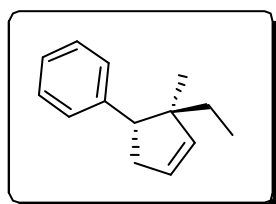

**2d.** Product isolated as colourless oil in 75 % yield, >99/1 anti/syn ratio with 90 % ee after column chromatography on silica gel using 100 % pentane as solvent.  $^1\text{H}$  (NMR) (400 MHz,  $\text{CDCl}_3$ )  $\delta$  7.40-7.10 (m, 5H) 5.80-5.63 (m, 2H) 3.22 (t, 1H,  $J=8.3$  Hz) 2.83-2.75 (m, 2H) 1.60-1.50 (m, 2H) 1 (t, 3H,  $J=7.4$  Hz) 0.70 (s, 3H).  $^{13}\text{C}$  NMR (75 MHz,  $\text{CDCl}_3$ )  $\delta$  142.2, 139.4, 130.4, 128.8, 127.9, 127.8, 127.6, 126, 52, 51.7, 37.8, 32.9, 22, 9.5. HRMS (EI + mode) m:z expected: 186,1409 observed: 186,1410.  $[\alpha] = +8.7$  (c 1.33,  $\text{CHCl}_3$ ).

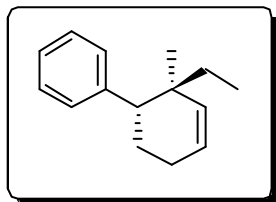

**2e.** Product isolated as colourless oil in 65 % yield, >99/1 anti/syn ratio with 91 % ee after column chromatography on silica gel using 100 % pentane as solvent.  $^1\text{H}$  (NMR) (400 MHz,  $\text{CDCl}_3$ )  $\delta$  7.40-7.10 (m, 5H) 5.80-5.63 (m, 2H) 3.22 (t, 1H,  $J=8.3$  Hz) 2.80-2.75 (m, 2H) 1.50-1.20 (m, 4H) 1 (t, 3H,  $J=7.4$  Hz) 0.70 (s, 3H).  $^{13}\text{C}$  NMR (75 MHz,  $\text{CDCl}_3$ )  $\delta$  143.8, 136.8, 129.2, 127.5, 125.9, 125.5, 45.6, 39.1, 32.6, 26.2, 25.3, 23.5, 8.6. HRMS (EI + mode) m:z expected: 200,1565 observed: 200,1566.  $[\alpha] = +10.6$  (c 1.33,  $\text{CHCl}_3$ ).

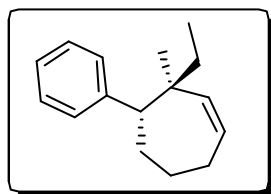

**2f.** Product isolated as colourless oil in 62 % yield, >99/1 anti/syn ratio with 91 % ee after column chromatography on silica gel using 100 % pentane as solvent.  $^1\text{H}$  (NMR) (400 MHz,  $\text{CDCl}_3$ )  $\delta$  7.40-7.10 (m, 5H) 5.80-5.63 (m, 2H) 3.22 (t, 1H,  $J=8.30$  Hz) 2.85-2.75 (m, 2H) 1.50-1.10 (m, 6H) 1 (t, 3H,  $J=7.4$  Hz) 0.70 (s, 3H).  $^{13}\text{C}$  NMR (75 MHz,  $\text{CDCl}_3$ )  $\delta$  143.8, 136.8, 129.2, 127.5, 125.9, 125.5, 45.6, 39.1, 32.6, 27.4, 26.2, 25.3, 23.5, 8.6. HRMS (EI + mode) m:z expected: 214,1722 observed: 214,1720.  $[\alpha] = +11.1$  (c 1.33,  $\text{CHCl}_3$ ).

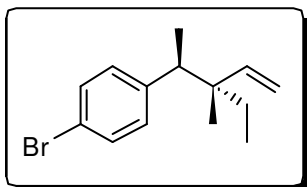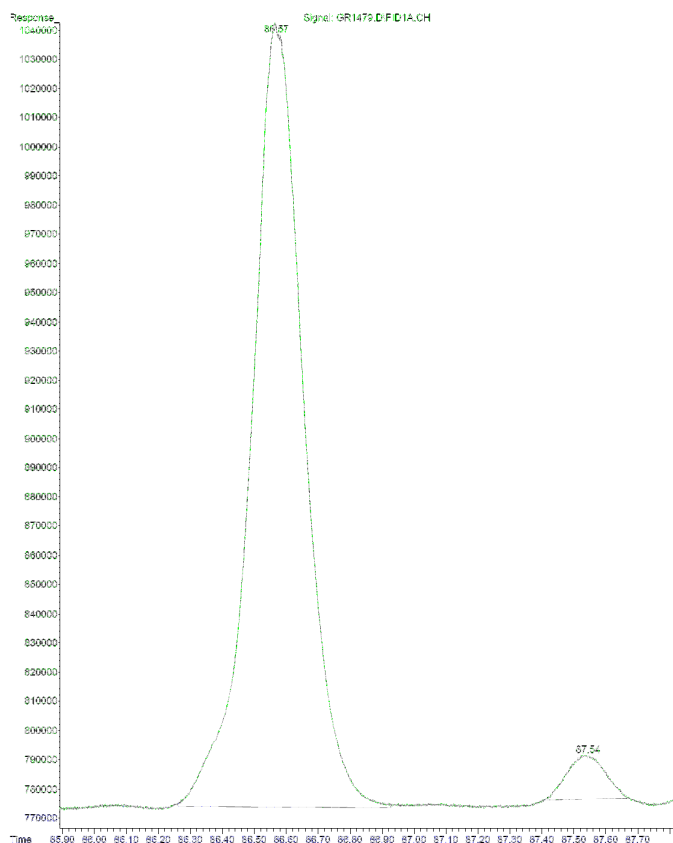

Data Path : E:\GC 5&6 Janvier 2013 - Octobre 2013\  
 Data File : GR1479.D  
 Signal(s) : FID1A.CH  
 Acq On : 11.10.2013 03:56:07 PM  
 Sample : GR1479  
 Misc :  
 ALS Vial : 1 Sample Multiplier: 1

Integration File: autoint1.e

Method : C:\MSDCHEM\2\METHODS\F60-1.M  
 Title :

Signal : FID1A.CH

| peak #                  | R.T. min | Start min | End min | PK TY | peak height | peak area | peak % max. | % of total |
|-------------------------|----------|-----------|---------|-------|-------------|-----------|-------------|------------|
| 1                       | 86.565   | 86.262    | 86.928  | M     | 269149      | 30706278  | 100.00%     | 96.077%    |
| 2                       | 87.541   | 87.409    | 87.671  | M     | 14915       | 1253783   | 4.08%       | 3.923%     |
| Sum of corrected areas: |          |           |         |       |             | 31960061  |             |            |

60-1.M Sat Nov 16 18:57:10 2013

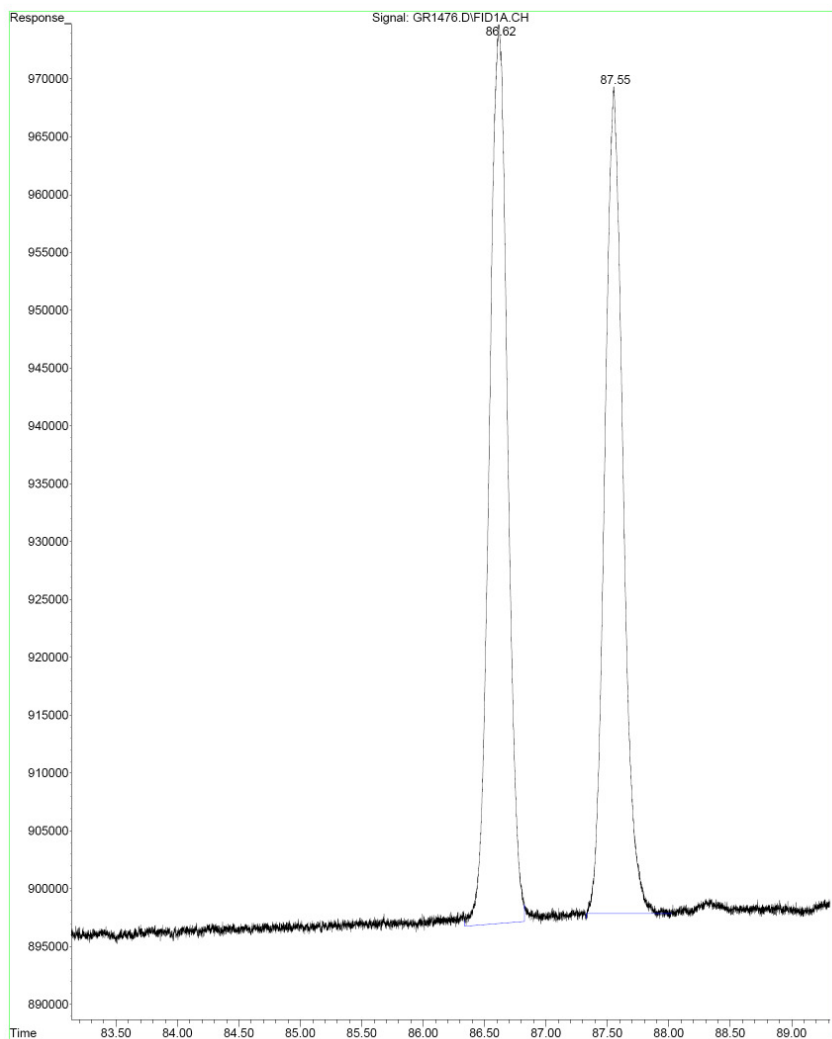

| peak #                  | R.T. min | Start min | End min | PK TY | peak height | peak area | peak % max. | % of total |
|-------------------------|----------|-----------|---------|-------|-------------|-----------|-------------|------------|
| 1                       | 86.619   | 86.339    | 86.824  | M     | 78411       | 8074753   | 100.00%     | 52.199%    |
| 2                       | 87.551   | 87.327    | 88.020  | M     | 71486       | 7394491   | 91.58%      | 47.801%    |
| Sum of corrected areas: |          |           |         |       |             | 15469244  |             |            |

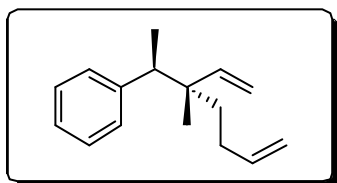

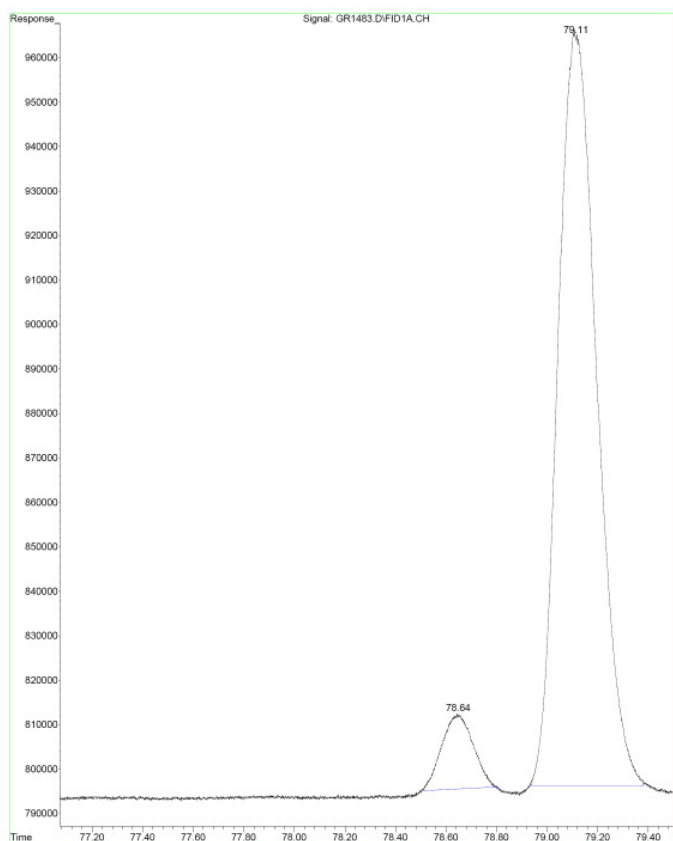

Data Path : E:\GC 5&6 Janvier 2013 - Octobre 2013\  
 Data File : GR1483.D  
 Signal(s) : FID1A.CH  
 Acq On : 14.10.2013 06:46:46 PM  
 Sample : GR1483  
 Misc :  
 ALS Vial : 1 Sample Multiplier: 1

Integration File: autoint1.e

Method : C:\MSDCHEM\2\METHODS\F60-1.M  
 Title :

Signal : FID1A.CH

| peak #                  | R.T. min | Start min | End min | PK TY | peak height | peak area | peak % max. | % of total |
|-------------------------|----------|-----------|---------|-------|-------------|-----------|-------------|------------|
| 1                       | 78.642   | 78.511    | 78.799  | M     | 17001       | 1445618   | 7.95%       | 7.368%     |
| 2                       | 79.109   | 78.927    | 79.380  | M     | 170121      | 18173368  | 100.00%     | 92.632%    |
| Sum of corrected areas: |          |           |         |       |             | 19618986  |             |            |

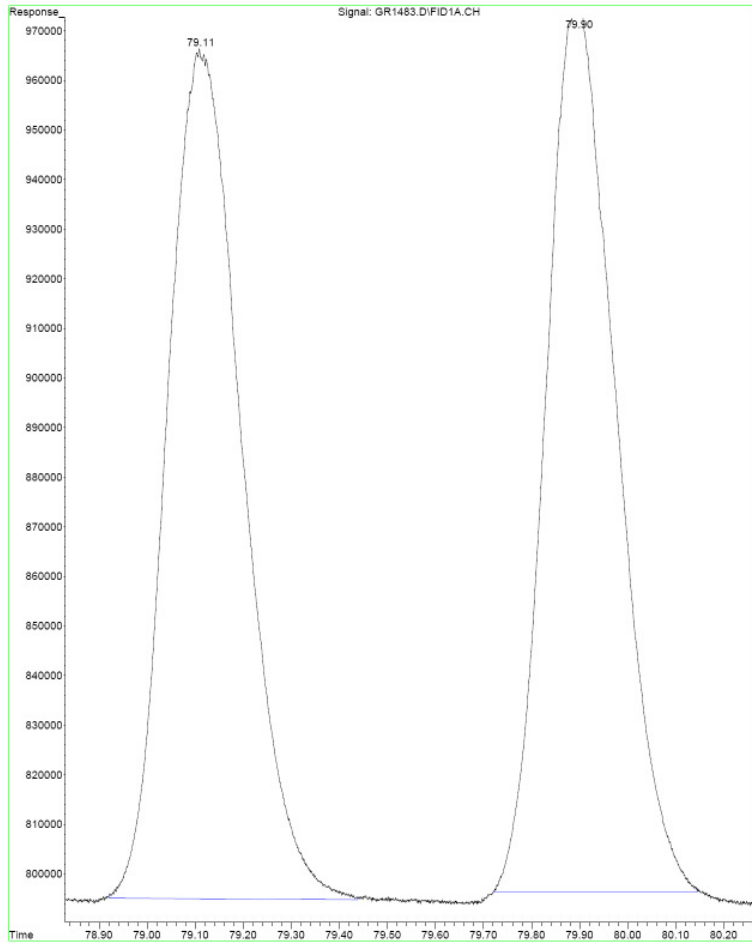

Data Path : E:\GC 5&6 Janvier 2013 - Octobre 2013\  
 Data File : GR1483.D  
 Signal(s) : FID1A.CH  
 Acq On : 14.10.2013 06:46:46 PM  
 Sample : GR1483  
 Misc :  
 ALS Vial : 1 Sample Multiplier: 1

Integration File: autoint1.e

Method : C:\MSDCHEM\2\METHODS\F60-1.M  
 Title :

Signal : FID1A.CH

| peak #                  | R.T. min | Start min | End min | PK TY | peak height | peak area | peak % max. | % of total |
|-------------------------|----------|-----------|---------|-------|-------------|-----------|-------------|------------|
| 1                       | 79.109   | 78.921    | 79.438  | M     | 171399      | 18572744  | 100.00%     | 50.508%    |
| 2                       | 79.896   | 79.721    | 80.144  | M     | 177739      | 18199095  | 97.99%      | 49.492%    |
| Sum of corrected areas: |          |           |         |       |             | 36771839  |             |            |

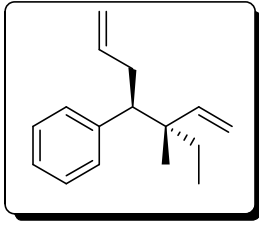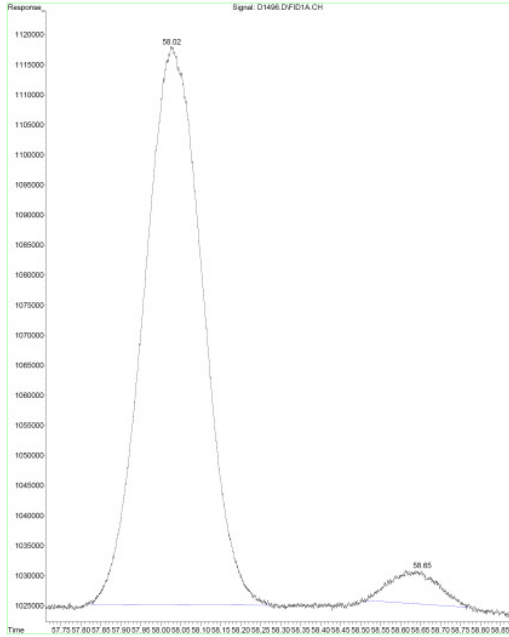

Data Path : E:\GC 5&6 Janvier 2013 - Octobre 2013\  
 Data File : D1496.D  
 Signal(s) : FID1A.CH  
 Acq On : 22.10.2013 06:59:03 PM  
 Sample : D1496  
 Misc :  
 ALS Vial : 1 Sample Multiplier: 1

Integration File: autoint1.e

Method : C:\MSDCHEM\2\METHODS\F60-1.M  
 Title :

Signal : FID1A.CH

| Peak #                  | R.T. min | Start min | End min | PK TY | peak height | peak area | peak % max. | % of total |
|-------------------------|----------|-----------|---------|-------|-------------|-----------|-------------|------------|
| 1                       | 58.024   | 57.824    | 58.271  | M     | 92911       | 9508728   | 100.00%     | 95.427%    |
| 2                       | 58.652   | 58.513    | 58.766  | M     | 5599        | 455689    | 4.79%       | 4.573%     |
| Sum of corrected areas: |          |           |         |       |             |           | 9964417     |            |



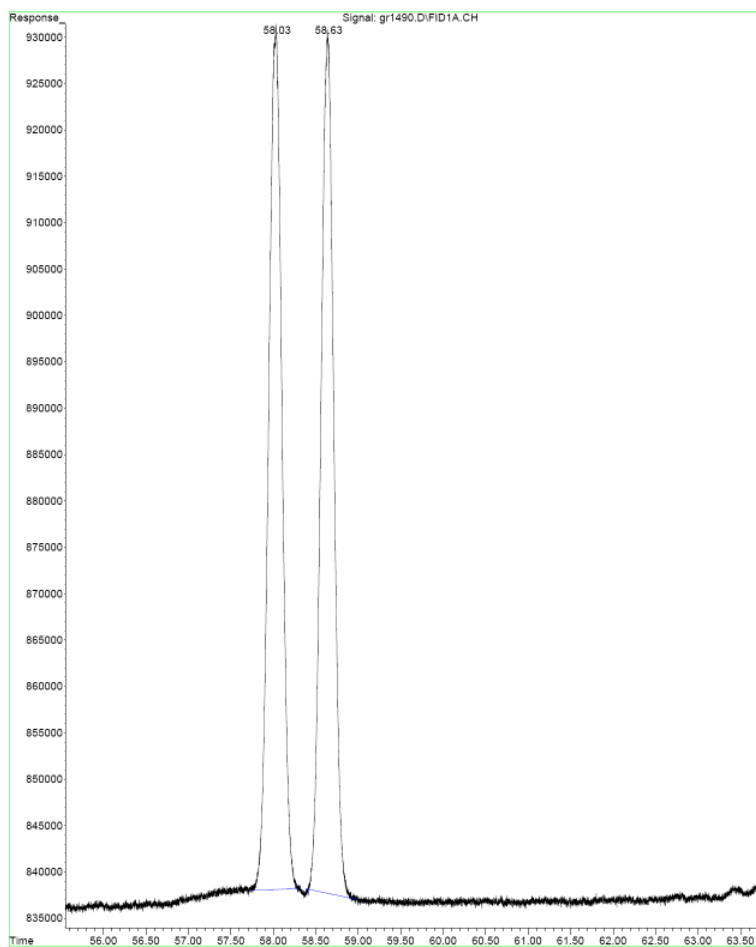

Data Path : E:\GC 5&6 Janvier 2013 - Octobre 2013\  
 Data File : gr1490.D  
 Signal(s) : FID1A.CH  
 Acq On : 18.10.2013 01:24:18 PM  
 Sample : gr1490  
 Misc :  
 ALS Vial : 1 Sample Multiplier: 1

Integration File: autoint1.e

Method : C:\MSDCHEM\2\METHODS\F60-1.M  
 Title :

Signal : FID1A.CH

| peak #                  | R.T. min | Start min | End min | PK TY | peak height | peak area | peak % max. | % of total |
|-------------------------|----------|-----------|---------|-------|-------------|-----------|-------------|------------|
| 1                       | 58.027   | 57.755    | 58.283  | M     | 93339       | 10123970  | 100.00%     | 50.938%    |
| 2                       | 58.634   | 58.385    | 58.975  | M     | 93179       | 9751091   | 96.32%      | 49.062%    |
| Sum of corrected areas: |          |           |         |       |             |           | 19875061    |            |

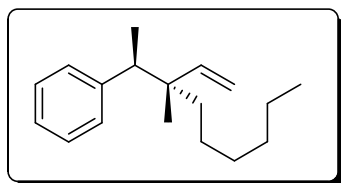

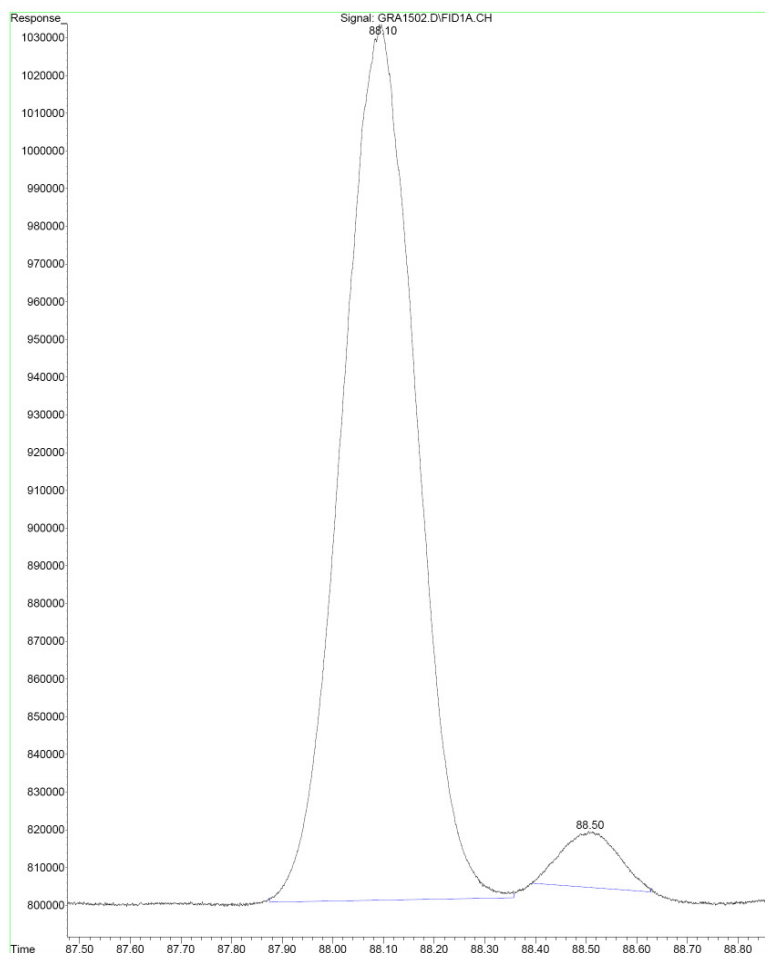

Data Path : E:\GC 5&6 Janvier 2013 - Octobre 2013\  
 Data File : GRA1502.D  
 Signal(s) : FID1A.CH  
 Acq On : 28.10.2013 09:07:38 PM  
 Sample : GRA1502  
 Misc :  
 ALS Vial : 1 Sample Multiplier: 1

Integration File: autoint1.e

Method : C:\MSDCHEM\2\METHODS\F60-1.M  
 Title :

Signal : FID1A.CH

| peak #                  | R.T. min | Start min | End min | PK TY | peak height | peak area | peak % max. | % of total |
|-------------------------|----------|-----------|---------|-------|-------------|-----------|-------------|------------|
| 1                       | 88.096   | 87.875    | 88.357  | M     | 232947      | 23565828  | 100.00%     | 95.286%    |
| 2                       | 88.505   | 88.393    | 88.628  | M     | 14880       | 1165896   | 4.95%       | 4.714%     |
| Sum of corrected areas: |          |           |         |       |             |           | 24731724    |            |

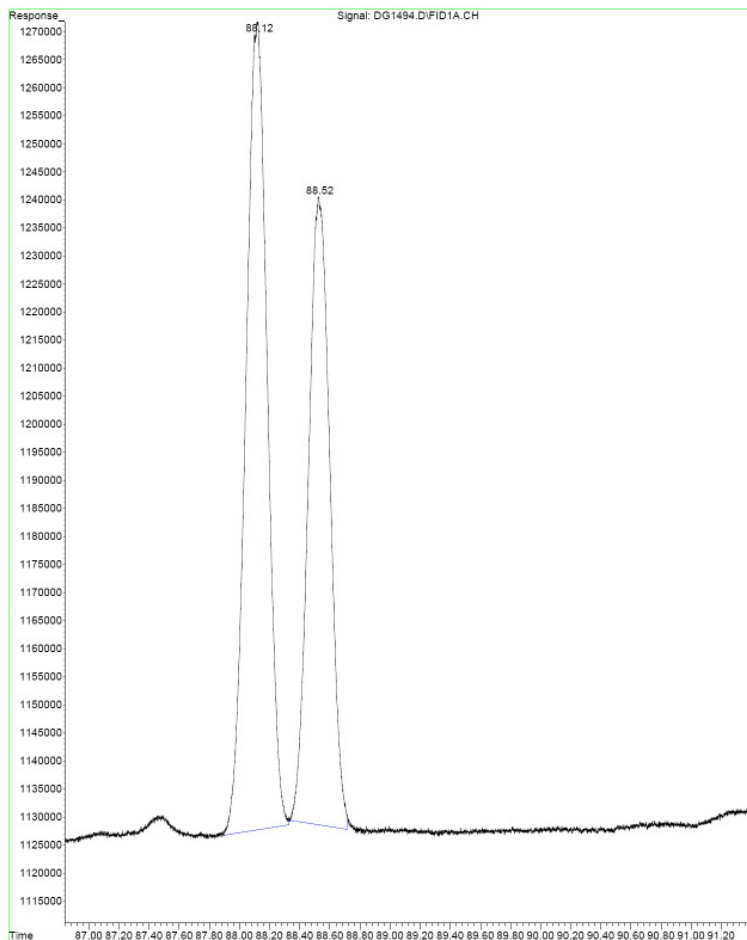

Data Path : E:\GC 5&6 Janvier 2013 - Octobre 2013\  
 Data File : DG1494.D  
 Signal(s) : FID1A.CH  
 Acq On : 22.10.2013 09:17:11 AM  
 Sample : DG1494  
 Misc :  
 ALS Vial : 1 Sample Multiplier: 1

Integration File: autoint1.e

Method : C:\MSDCHEM\2\METHODS\F60-1.M  
 Title :

Signal : FID1A.CH

| peak #                  | R.T. min | Start min | End min | PK TY | peak height | peak area | peak % max. | % of total |
|-------------------------|----------|-----------|---------|-------|-------------|-----------|-------------|------------|
| 1                       | 88.123   | 87.886    | 88.328  | M     | 144576      | 14272735  | 100.00%     | 56.332%    |
| 2                       | 88.524   | 88.337    | 88.716  | M     | 111965      | 11063935  | 77.52%      | 43.668%    |
| Sum of corrected areas: |          |           |         |       |             | 25336670  |             |            |

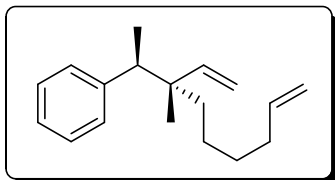

File :E:\GC 546 Janvier 2013 - Octobre 2013\GR1504.D  
 Operator : DG  
 Acquired : 29.10.2013 05:08:39 PM using AcqMethod F60-1.M  
 Instrument : GC CHIRAL  
 Sample Name: GR1504  
 Misc Info :  
 Vial Number: 1

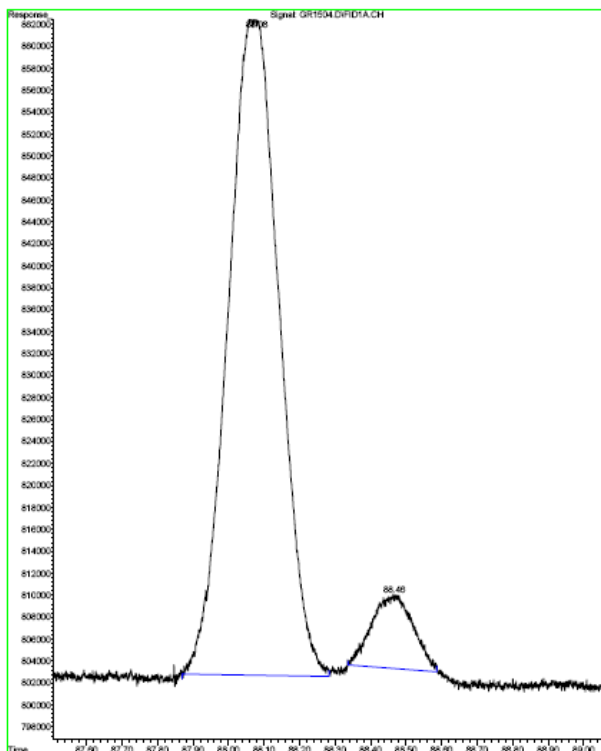

Signal : FID1A.CH

| peak #                  | R.T. min | Start min | End min | PK TY | peak height | peak area | peak % max. | % of total |
|-------------------------|----------|-----------|---------|-------|-------------|-----------|-------------|------------|
| 1                       | 88.076   | 87.869    | 88.283  | M     | 60272       | 5993836   | 100.00%     | 91.740%    |
| 2                       | 88.463   | 88.336    | 88.586  | M     | 6786        | 539670    | 9.00%       | 8.260%     |
| Sum of corrected areas: |          |           |         |       |             |           | 6533507     |            |

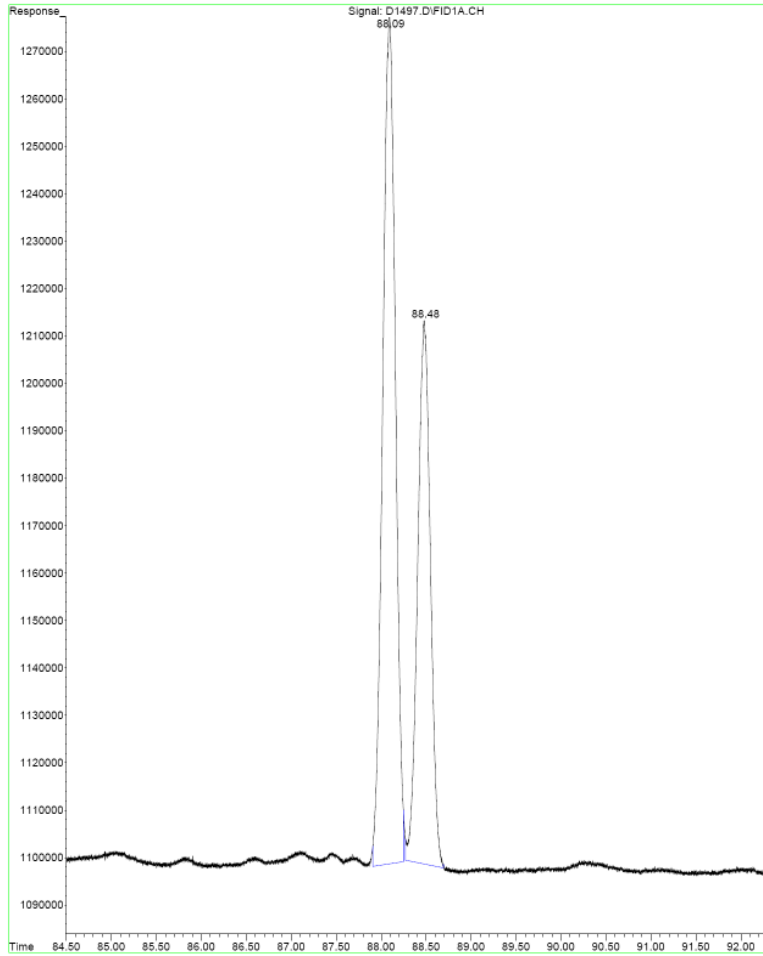

Data Path : E:\GC 5&6 Janvier 2013 - Octobre 2013\  
 Data File : D1497.D  
 Signal(s) : FID1A.CH  
 Acq On : 23.10.2013 01:21:38 PM  
 Sample : D1497  
 Misc :  
 ALS Vial : 1 Sample Multiplier: 1

Integration File: autoint1.e

Method : C:\MSDCHEM\2\METHODS\F60-1.M  
 Title :

Signal : FID1A.CH

| peak #                  | R.T. min | Start min | End min | PK TY | peak height | peak area | peak % max. | % of total |
|-------------------------|----------|-----------|---------|-------|-------------|-----------|-------------|------------|
| 1                       | 88.088   | 87.906    | 88.246  | M     | 179120      | 17616254  | 100.00%     | 60.960%    |
| 2                       | 88.477   | 88.269    | 88.691  | M     | 114604      | 11281731  | 64.04%      | 39.040%    |
| Sum of corrected areas: |          |           |         |       |             | 28897984  |             |            |

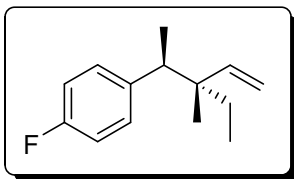

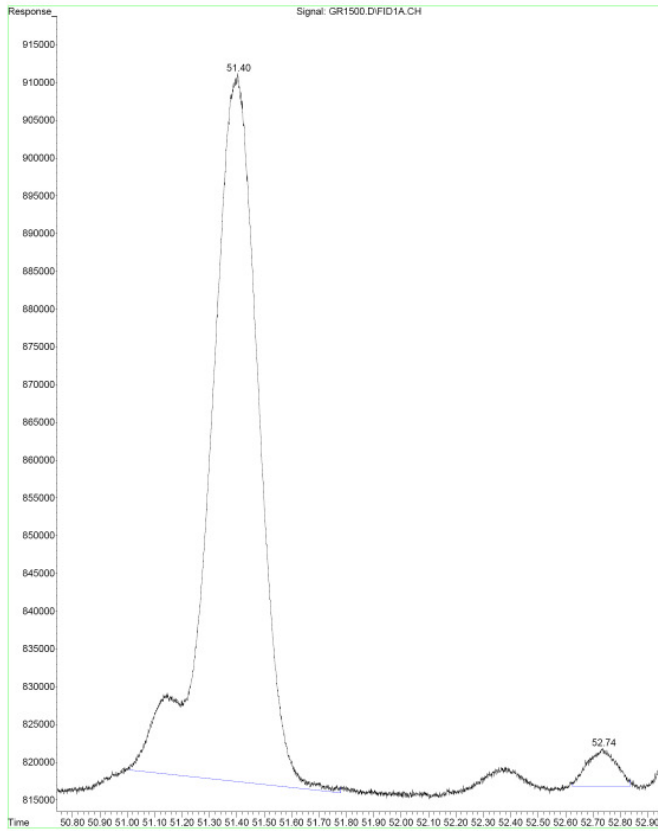

Signal : FID1A.CH

| peak #                  | R.T. min | Start min | End min | PK TY | peak height | peak area | peak % max. | % of total |
|-------------------------|----------|-----------|---------|-------|-------------|-----------|-------------|------------|
| 1                       | 51.402   | 51.008    | 51.779  | M     | 93823       | 11567605  | 100.00%     | 96.968%    |
| 2                       | 52.735   | 52.625    | 52.836  | M     | 5060        | 361699    | 3.13%       | 3.032%     |
| Sum of corrected areas: |          |           |         |       |             | 11929304  |             |            |

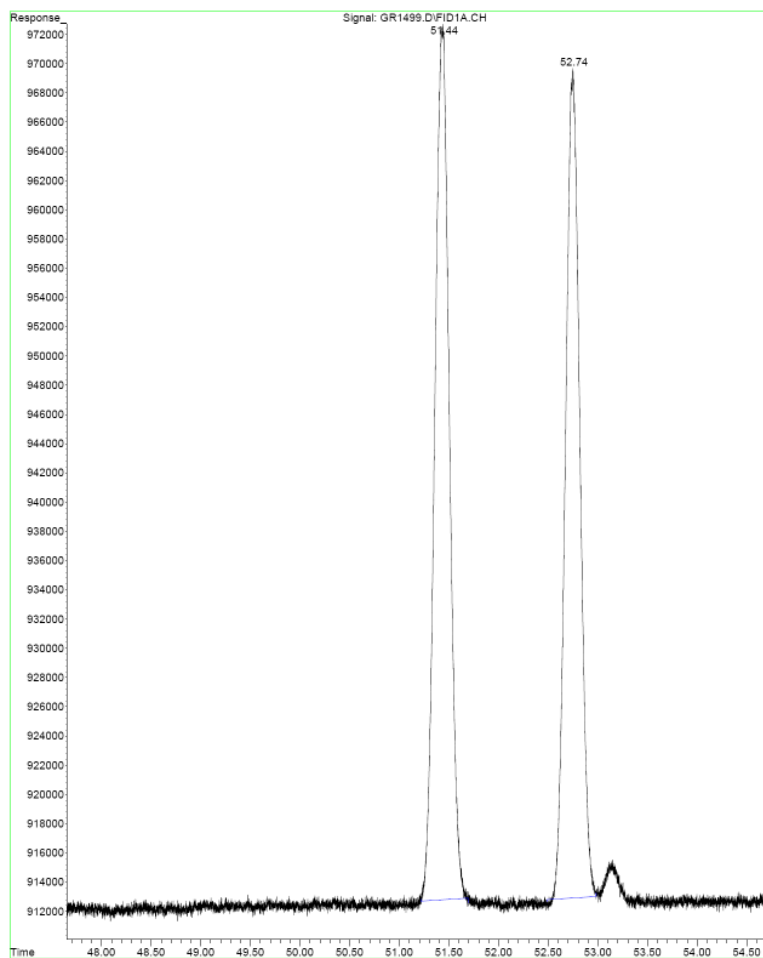

Data Path : E:\GC 5&6 Janvier 2013 - Octobre 2013\  
 Data File : GR1499.D  
 Signal(s) : FID1A.CH  
 Acq On : 27.10.2013 05:33:54 PM  
 Sample : GR1499  
 Misc :  
 ALS Vial : 1 Sample Multiplier: 1

Integration File: autoint1.e

Method : C:\MSDCHEM\2\METHODS\F60-1.M  
 Title :

Signal : FID1A.CH

| peak #                  | R.T. min | Start min | End min | PK TY | peak height | peak area | peak % max. | % of total |
|-------------------------|----------|-----------|---------|-------|-------------|-----------|-------------|------------|
| 1                       | 51.437   | 51.215    | 51.690  | M     | 59911       | 6113367   | 100.00%     | 51.719%    |
| 2                       | 52.744   | 52.485    | 52.981  | M     | 56773       | 5707092   | 93.35%      | 48.281%    |
| Sum of corrected areas: |          |           |         |       |             |           | 11820459    |            |

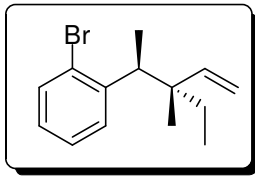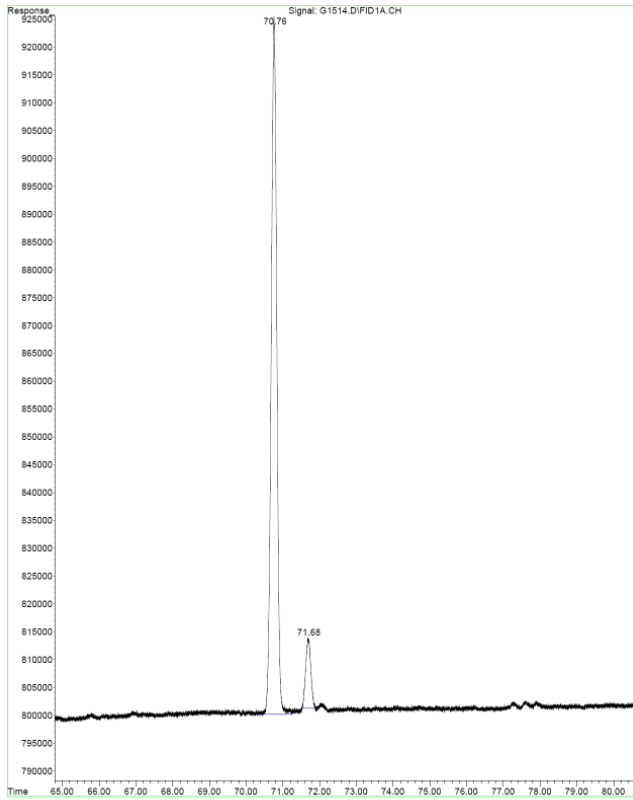

Data Path : E:\GC 5&6 Janvier 2013 - Octobre 2013\  
 Data File : G1514.D  
 Signal(s) : FID1A.CH  
 Acq On : 06.11.2013 10:45:26 PM  
 Sample : G1514  
 Misc :  
 ALS Vial : 1 Sample Multiplier: 1

Integration File: autoint1.e

Method : C:\MSDCHEM\2\METHODS\F60-1.M  
 Title :

Signal : FID1A.CH

| peak #                  | R.T. min | Start min | End min | PK TY | peak height | peak area | peak % max. | % of total |
|-------------------------|----------|-----------|---------|-------|-------------|-----------|-------------|------------|
| 1                       | 70.759   | 70.395    | 71.221  | M     | 125391      | 13206137  | 100.00%     | 91.671%    |
| 2                       | 71.675   | 71.527    | 71.925  | M     | 12644       | 1199826   | 9.09%       | 8.329%     |
| Sum of corrected areas: |          |           |         |       |             | 14405963  |             |            |



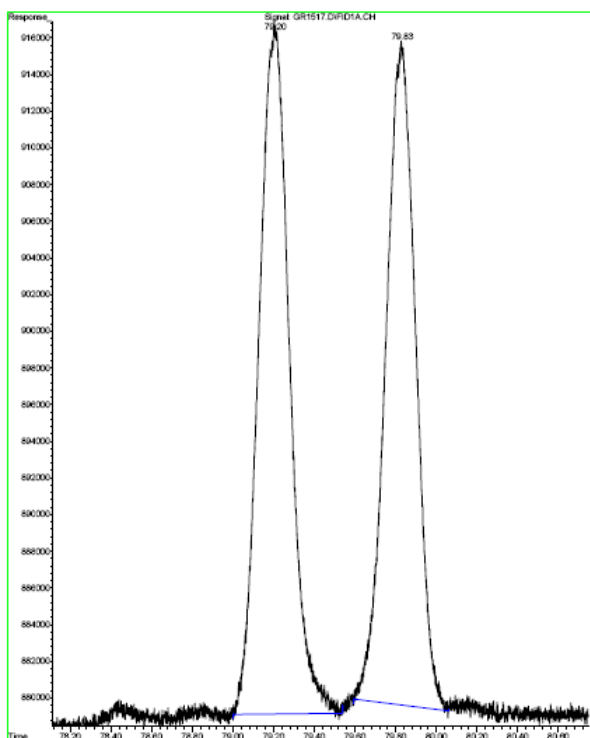

Data Path : C:\MSDCHEM\2\DATA\  
 Data File : GR1517.D  
 Signal(s) : FID1A.CH  
 Acq On : 07.11.2013 01:50:33 PM  
 Sample : GR1517  
 Misc :  
 ALS Vial : 1 Sample Multiplier: 1

Integration File: autoint1.e

Method : C:\MSDCHEM\2\METHODS\F60-1.M  
 Title :

Signal : FID1A.CH

| peak #                  | R.T. min | Start min | End min | PK TY | peak height | peak area | peak % max. | % of total |
|-------------------------|----------|-----------|---------|-------|-------------|-----------|-------------|------------|
| 1                       | 79.203   | 79.001    | 79.540  | M     | 37739       | 3925778   | 100.00%     | 51.522%    |
| 2                       | 79.827   | 79.593    | 80.060  | M     | 36216       | 3693859   | 94.09%      | 48.478%    |
| Sum of corrected areas: |          |           |         |       |             |           | 7619637     |            |

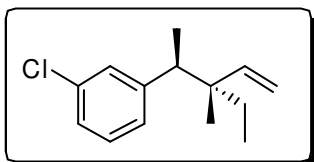

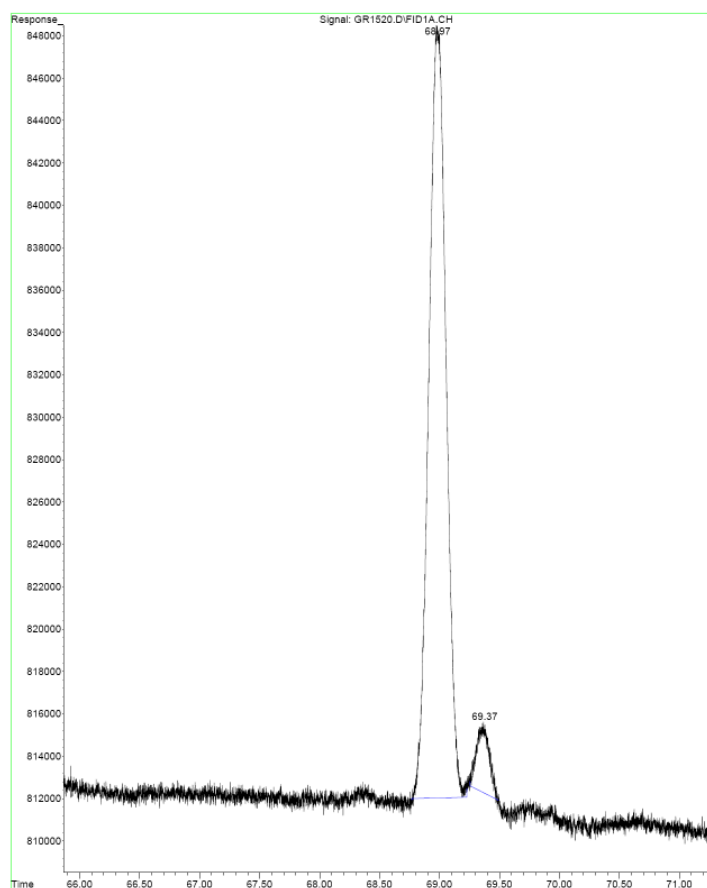

Data Path : C:\MSDCHEM\2\DATA\  
 Data File : GR1520.D  
 Signal(s) : FID1A.CH  
 Acq On : 11.11.2013 06:01:09 PM  
 Sample : GR1520  
 Misc :  
 ALS Vial : 1 Sample Multiplier: 1

Integration File: autoint1.e

Method : C:\MSDCHEM\2\METHODS\F60-1.M  
 Title :

Signal : FID1A.CH

| peak #                  | R.T. min | Start min | End min | PK TY | peak height | peak area | peak % max. | % of total |
|-------------------------|----------|-----------|---------|-------|-------------|-----------|-------------|------------|
| 1                       | 68.973   | 68.768    | 69.227  | M     | 36475       | 3663155   | 100.00%     | 93.939%    |
| 2                       | 69.366   | 69.253    | 69.487  | M     | 3344        | 236331    | 6.45%       | 6.061%     |
| Sum of corrected areas: |          |           |         |       |             |           | 3899485     |            |

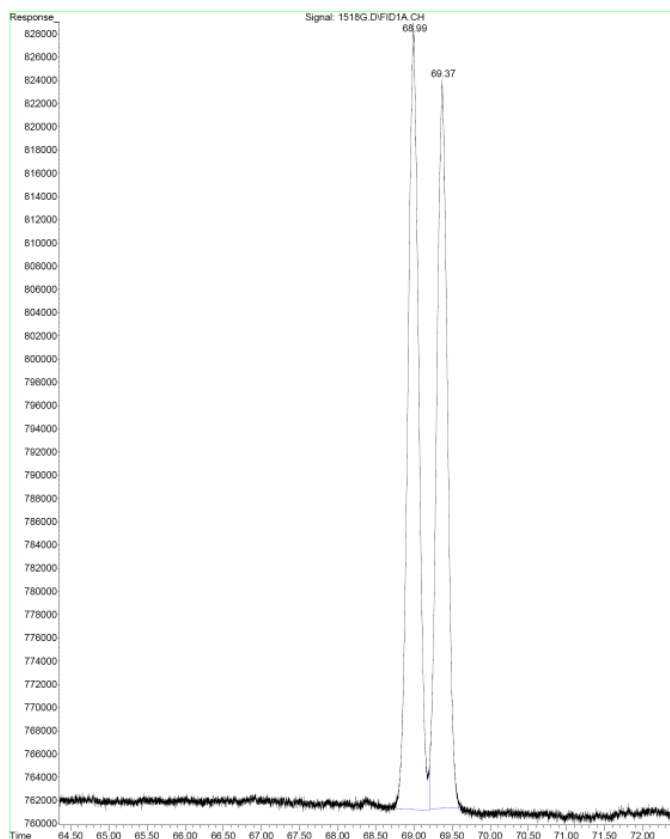

Data Path : C:\MSDCHEM\2\DATA\  
 Data File : 1518G.D  
 Signal(s) : FID1A.CH  
 Acq On : 08.11.2013 06:46:22 PM  
 Sample : 1518G  
 Misc :  
 ALS Vial : 3 Sample Multiplier: 1

Integration File: autoint1.e

Method : C:\MSDCHEM\2\METHODS\F60-1.M  
 Title :

Signal : FID1A.CH

| peak #                  | R.T. min | Start min | End min | PK TY | peak height | peak area | peak % max. | % of total |
|-------------------------|----------|-----------|---------|-------|-------------|-----------|-------------|------------|
| 1                       | 68.993   | 68.764    | 69.206  | M     | 67752       | 6729447   | 100.00%     | 52.278%    |
| 2                       | 69.367   | 69.206    | 69.601  | M     | 62778       | 6142918   | 91.28%      | 47.722%    |
| Sum of corrected areas: |          |           |         |       |             |           | 12872365    |            |

60-1.M Thu Nov 14 17:55:52 2013

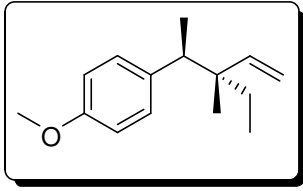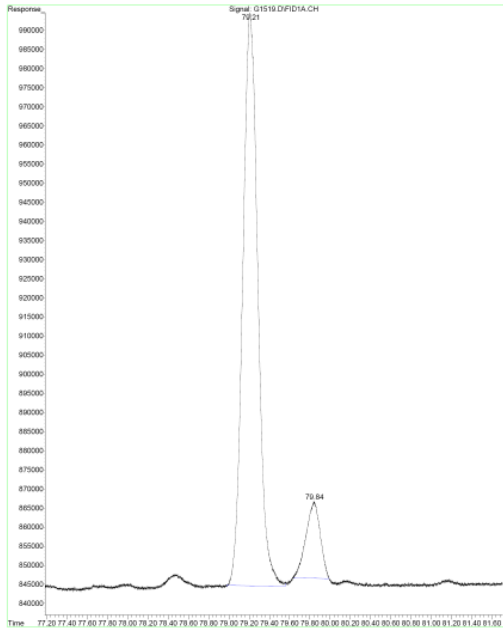

| peak #                  | R.T. min | Start min | End min | PK TY | peak height | peak area | peak % max. | % of total |
|-------------------------|----------|-----------|---------|-------|-------------|-----------|-------------|------------|
| 1                       | 79.208   | 78.978    | 79.558  | M     | 150602      | 15502884  | 100.00%     | 88.807%    |
| 2                       | 79.836   | 79.641    | 79.987  | M     | 20130       | 1954026   | 12.60%      | 11.193%    |
| Sum of corrected areas: |          |           |         |       |             | 17456909  |             |            |

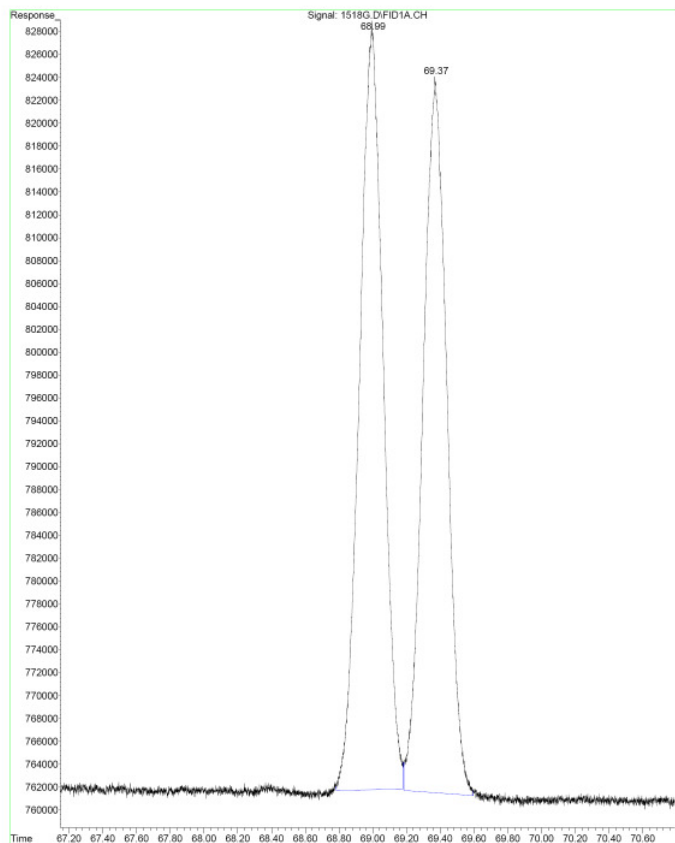

| peak #                  | R.T. min | Start min | End min | PK TY | peak height | peak area | peak % max. | % of total |
|-------------------------|----------|-----------|---------|-------|-------------|-----------|-------------|------------|
| 1                       | 68.993   | 68.782    | 69.180  | M     | 67188       | 6538677   | 100.00%     | 51.557%    |
| 2                       | 69.367   | 69.184    | 69.595  | M     | 62583       | 6143855   | 93.96%      | 48.443%    |
| Sum of corrected areas: |          |           |         |       |             | 12682532  |             |            |

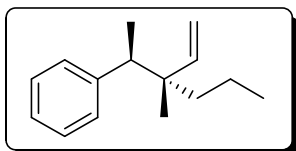

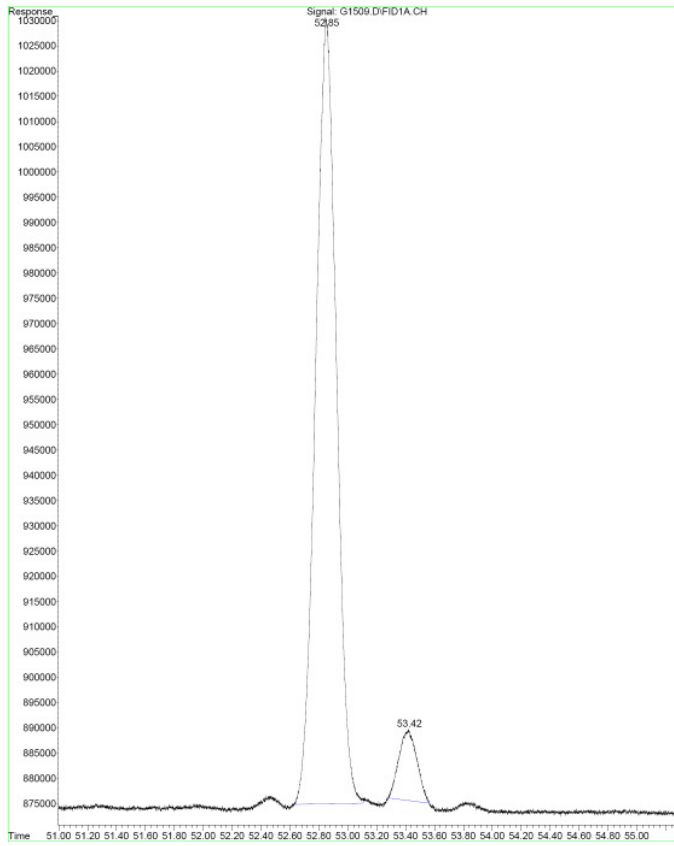

| peak #                  | R.T. min | Start min | End min | PK TY | peak height | peak area | peak % max. | % of total |
|-------------------------|----------|-----------|---------|-------|-------------|-----------|-------------|------------|
| 1                       | 52.845   | 52.640    | 53.107  | M     | 155698      | 15544692  | 100.00%     | 92.809%    |
| 2                       | 53.417   | 53.283    | 53.561  | M     | 14131       | 1204412   | 7.75%       | 7.191%     |
| Sum of corrected areas: |          |           |         |       |             | 16749105  |             |            |

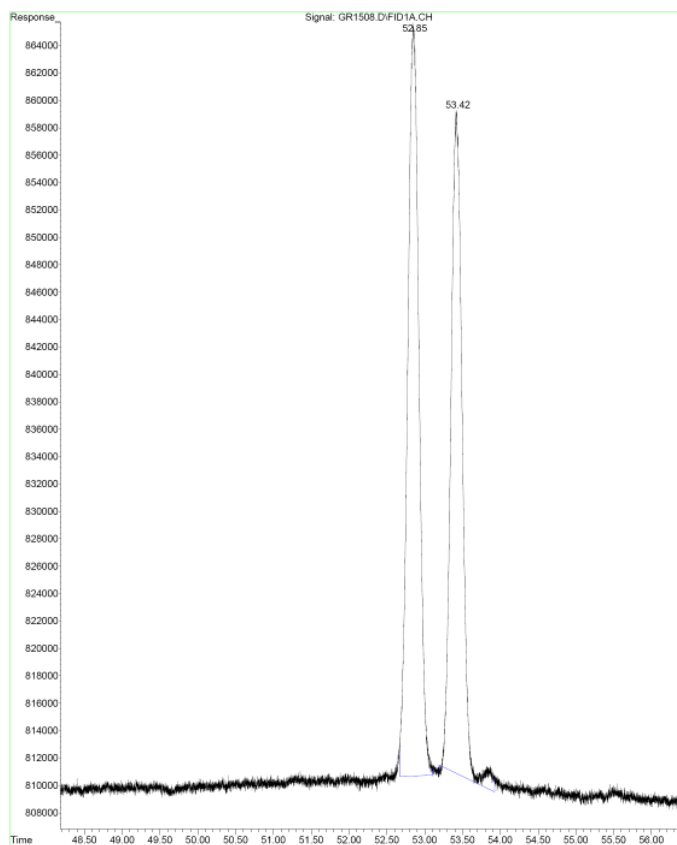

| peak #                  | R.T. min | Start min | End min | PK TY | peak height | peak area | peak % max. | % of total |
|-------------------------|----------|-----------|---------|-------|-------------|-----------|-------------|------------|
| 1                       | 52.850   | 52.665    | 53.095  | M     | 54975       | 5718408   | 100.00%     | 53.114%    |
| 2                       | 53.421   | 53.189    | 53.924  | M     | 48392       | 5047854   | 88.27%      | 46.886%    |
| Sum of corrected areas: |          |           |         |       |             | 10766262  |             |            |

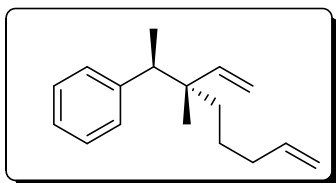

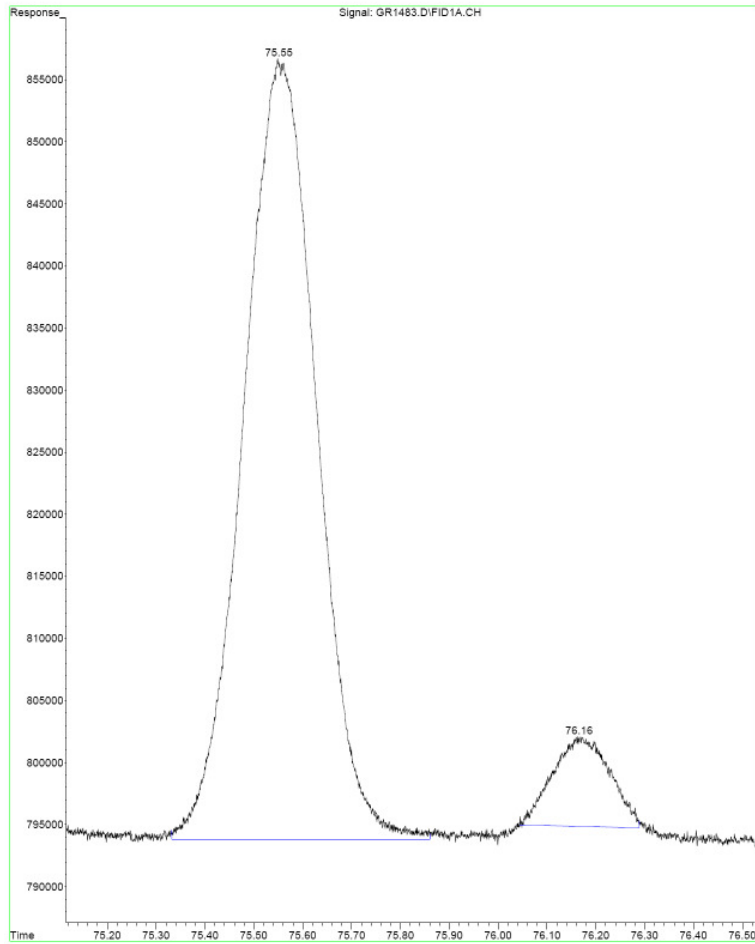

| Peak #                  | R.T. min | Start min | End min | PK TY | peak height | peak area | peak % max. | % of total |
|-------------------------|----------|-----------|---------|-------|-------------|-----------|-------------|------------|
| 1                       | 75.548   | 75.332    | 75.860  | M     | 62897       | 6532851   | 100.00%     | 91.791%    |
| 2                       | 76.163   | 76.044    | 76.289  | M     | 7245        | 584262    | 8.94%       | 8.209%     |
| Sum of corrected areas: |          |           |         |       |             |           | 7117112     |            |



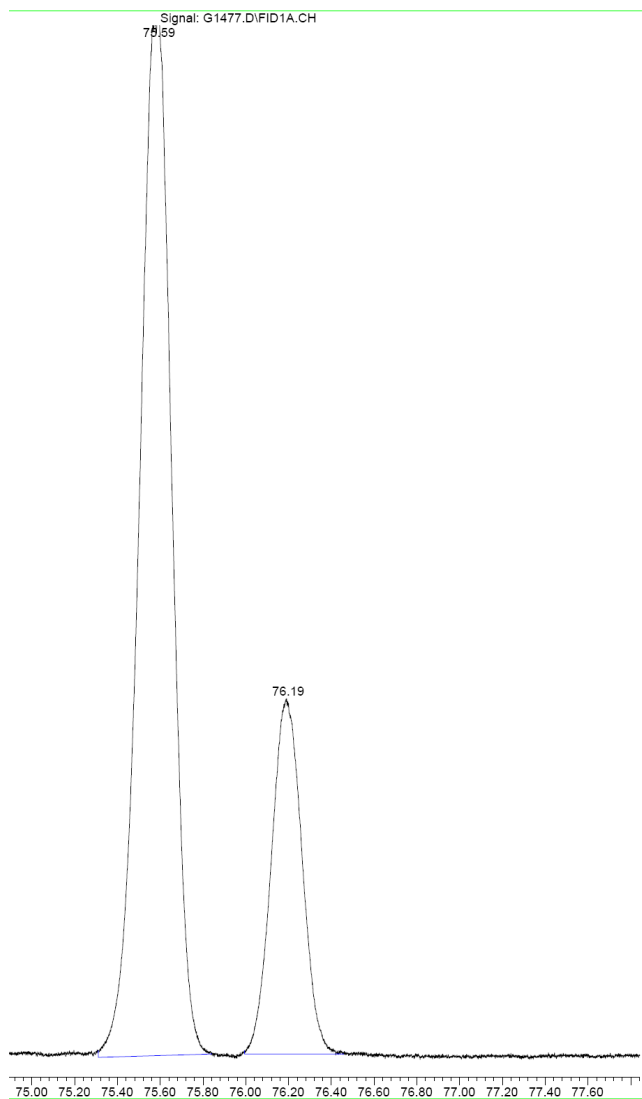

| peak #                  | R.T. min | Start min | End min | PK TY | peak height | peak area | peak % max. | % of total |
|-------------------------|----------|-----------|---------|-------|-------------|-----------|-------------|------------|
| 1                       | 75.587   | 75.310    | 75.839  | M     | 228687      | 24144654  | 100.00%     | 75.718%    |
| 2                       | 76.190   | 75.993    | 76.457  | M     | 77990       | 7743045   | 32.07%      | 24.282%    |
| Sum of corrected areas: |          |           |         |       |             | 31887699  |             |            |

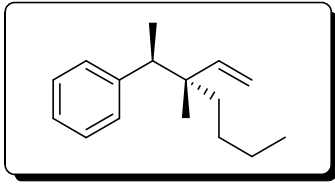

```

=====
Injection Date   : 08-Oct-13 5:23:22 PM
Sample Name     : GR1474
Acq. Operator   : dg
Location        : Vial 1
Inj             : 1
Inj Volume      : 1 µl

Acq. Method     : C:\HPCHEM\1\METHODS\60-1-170.M
Last changed    : 17-Jan-13 6:37:28 PM by DG
Analysis Method : C:\HPCHEM\1\METHODS\140-150.M
Last changed    : 18-Nov-13 1:01:48 PM by pg
                  (modified after loading)
=====

```

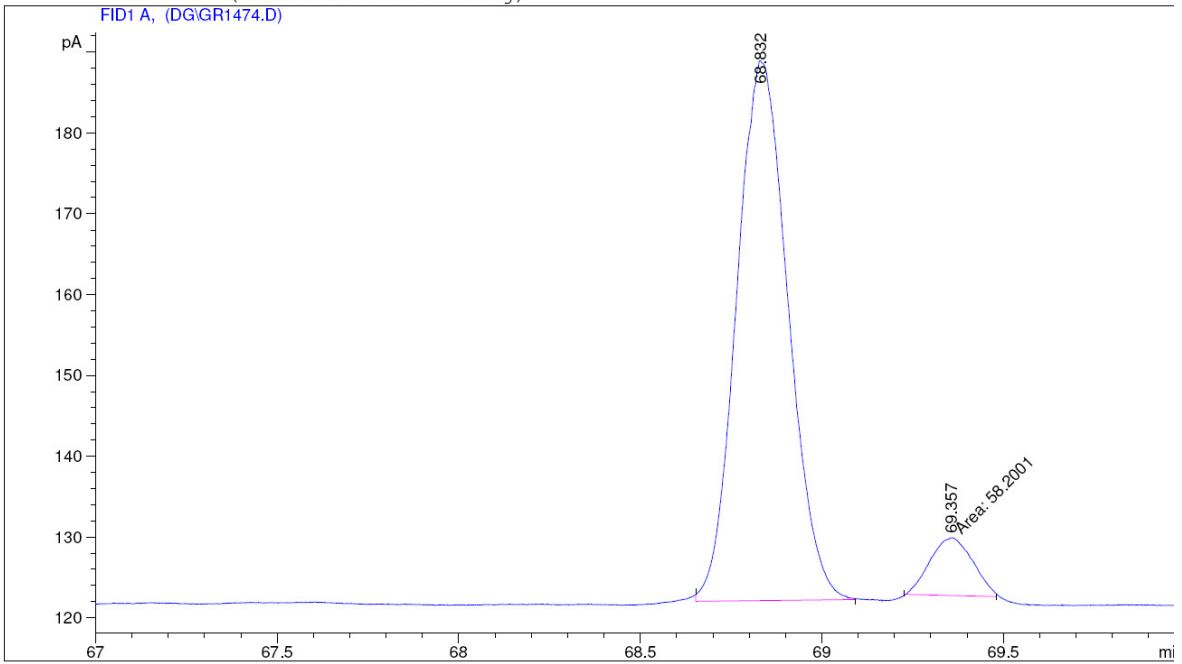

```

=====
                          Area Percent Report
=====

```

```

Sorted By      : Signal
Multiplier     : 1.0000
Dilution      : 1.0000
Use Multiplier & Dilution Factor with ISTDs

```

Signal 1: FID1 A,

| Peak # | RetTime [min] | Type | Width [min] | Area [pA*s] | Height [pA] | Area %   |
|--------|---------------|------|-------------|-------------|-------------|----------|
| 1      | 68.832        | BB   | 0.1248      | 656.95709   | 66.77818    | 91.86192 |
| 2      | 69.357        | MM   | 0.1362      | 58.20006    | 7.12276     | 8.13808  |

```

=====
Injection Date   : 20-Sep-13 7:34:39 PM      Seq. Line : 1
Sample Name     : gr1415                    Location  : Vial 1
Acq. Operator   : DG                       Inj      : 1
                                           Inj Volume: 1 µl

Acq. Method    : C:\HPCHEM\1\METHODS\60-1.M
Last changed   : 19-Mar-13 8:33:19 PM by LH
Analysis Method: C:\HPCHEM\1\METHODS\140-150.M
Last changed   : 18-Nov-13 12:58:11 PM by pg
                (modified after loading)
=====

```

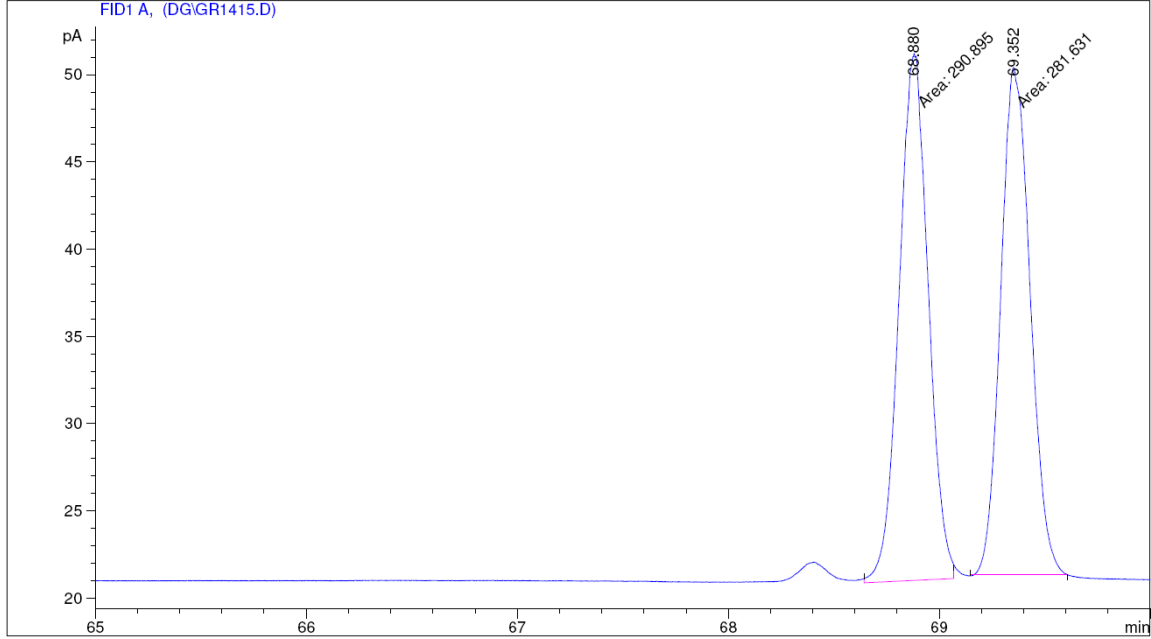

=====  
Area Percent Report  
=====

```

Sorted By      : Signal
Multiplier     : 1.0000
Dilution       : 1.0000
Use Multiplier & Dilution Factor with ISTDs

```

Signal 1: FID1 A,

| Peak # | RetTime [min] | Type | Width [min] | Area [pA*s] | Height [pA] | Area %   |
|--------|---------------|------|-------------|-------------|-------------|----------|
| 1      | 68.880        | MM   | 0.1604      | 290.89505   | 30.21913    | 50.80902 |
| 2      | 69.352        | MM   | 0.1617      | 281.63138   | 29.02872    | 49.19098 |

Totals : 572.52643 59.24785

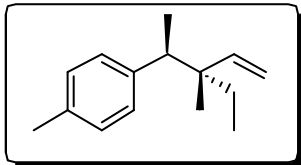

```

=====
Injection Date   : 08-Oct-13 8:15:04 PM
Sample Name     : G1473
Acq. Operator   : dg
Location       : Vial 1
Inj            : 1
Inj Volume     : 1 µl

Acq. Method    : C:\HPCHEM\1\METHODS\60-1-140.M
Last changed   : 18-Apr-12 5:02:59 PM by DM
Analysis Method : C:\HPCHEM\1\METHODS\140-150.M
Last changed   : 18-Nov-13 12:56:45 PM by pg
                (modified after loading)
=====

```

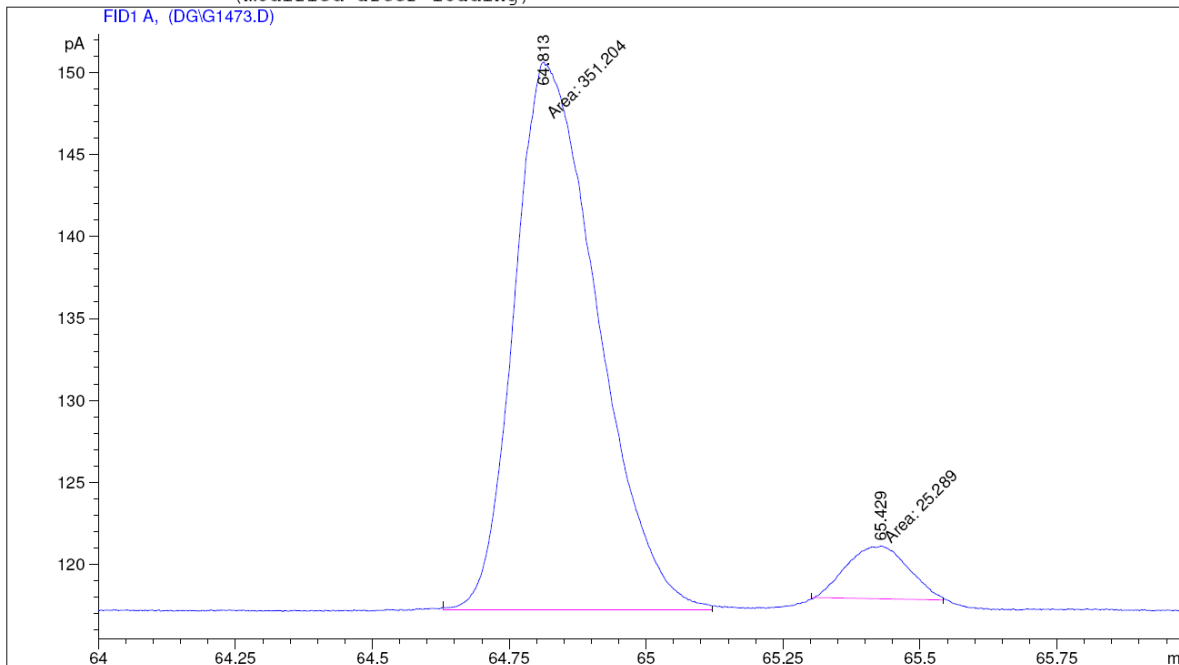

```

=====
                          Area Percent Report
=====

```

```

Sorted By           : Signal
Multiplier          : 1.0000
Dilution            : 1.0000
Use Multiplier & Dilution Factor with ISTDs

```

Signal 1: FID1 A,

| Peak # | RetTime [min] | Type | Width [min] | Area [pA*s] | Height [pA] | Area %   |
|--------|---------------|------|-------------|-------------|-------------|----------|
| 1      | 64.813        | MM   | 0.1750      | 351.20416   | 33.44104    | 93.28302 |
| 2      | 65.429        | MM   | 0.1306      | 25.28898    | 3.22723     | 6.71698  |

```

=====
Injection Date   : 07-Oct-13 10:13:47 PM
Sample Name      : gd1472
Acq. Operator    : dg
Acq. Instrument  : Instrument 3
Acq. Method      : C:\HPCHEM\3\METHODS\60-1.M
Last changed     : 28-Jan-13 3:51:42 PM by NG
Analysis Method  : C:\HPCHEM\1\METHODS\140-150.M
Last changed     : 18-Nov-13 12:32:05 PM by pg
                  (modified after loading)
Location         : Vial 1
Inj              : 1
Inj Volume       : 1 µl
=====

```

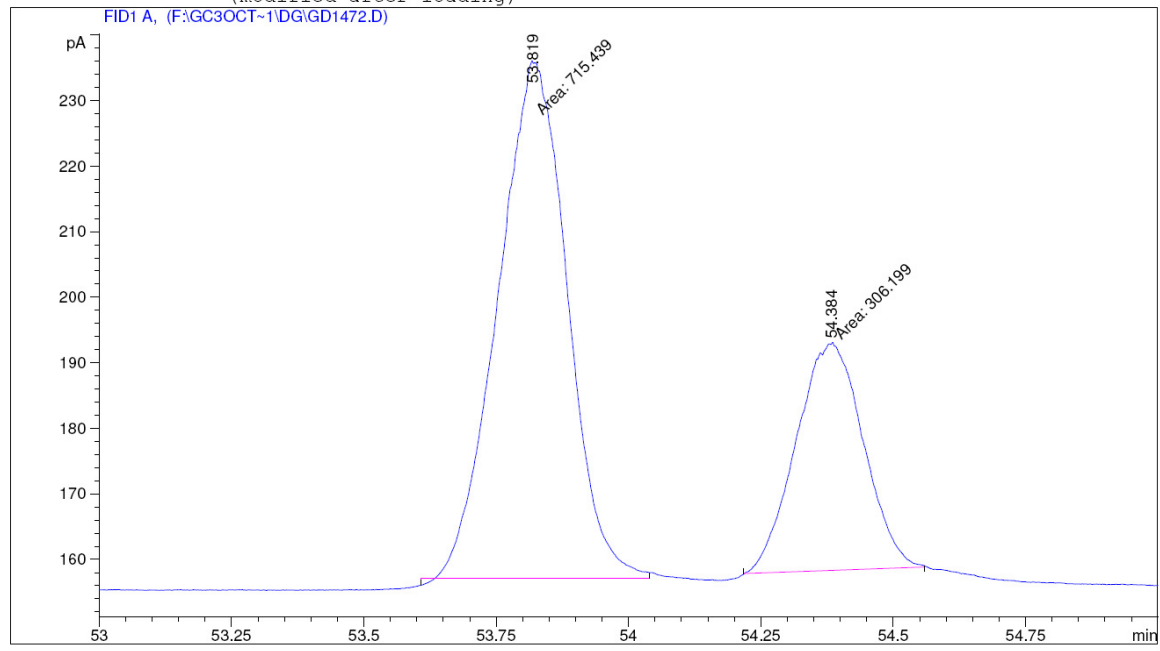

```

=====
Area Percent Report
=====
Sorted By      : Signal
Multiplier     : 1.0000
Dilution       : 1.0000
Use Multiplier & Dilution Factor with ISTDs

```

Signal 1: FID1 A,

| Peak # | RetTime [min] | Type | Width [min] | Area [pA*s] | Height [pA] | Area %   |
|--------|---------------|------|-------------|-------------|-------------|----------|
| 1      | 53.819        | MM   | 0.1511      | 715.43890   | 78.89700    | 70.02864 |
| 2      | 54.384        | MM   | 0.1470      | 306.19861   | 34.71799    | 29.97136 |

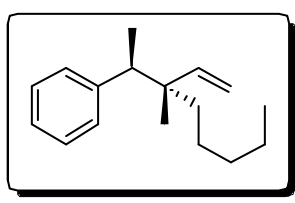

```

=====
Injection Date   : 01-Nov-13 9:08:47 AM
Sample Name     : DGPEN
Acq. Operator   : DG
Location       : Vial 1
Inj            : 1
Inj Volume     : 1 µl

Acq. Method    : C:\HPCHEM\1\METHODS\60-1.M
Last changed   : 19-Mar-13 8:33:19 PM by LH
Analysis Method: C:\HPCHEM\1\METHODS\140-150.M
Last changed   : 18-Nov-13 12:53:56 PM by pg
                (modified after loading)
=====

```

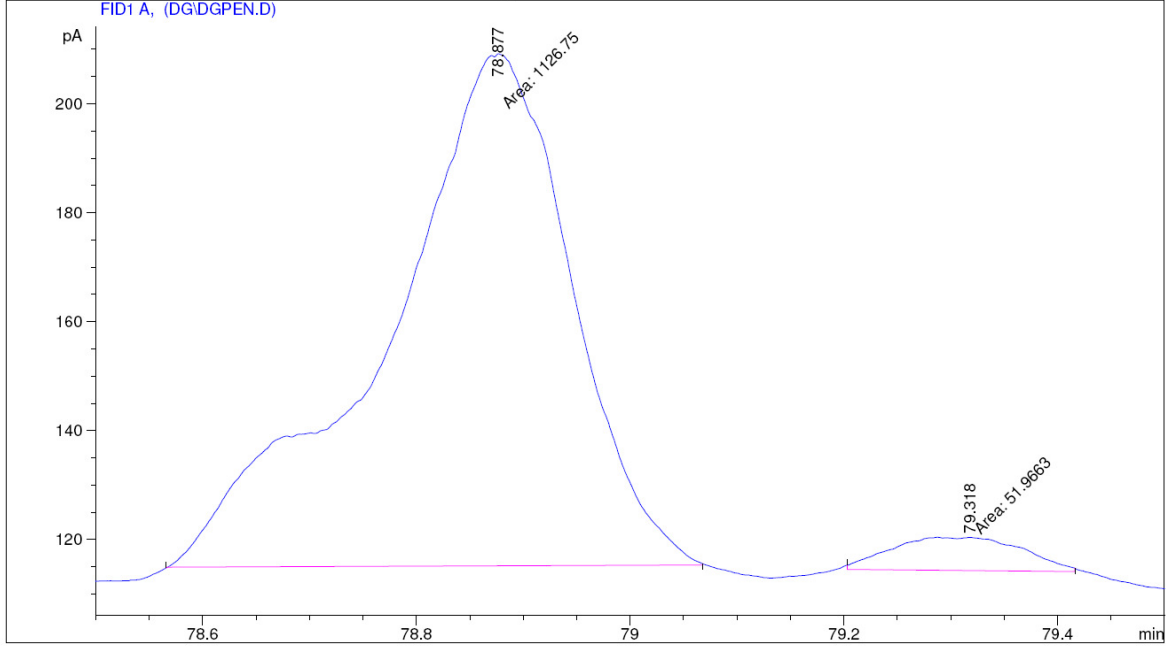

```

=====
                          Area Percent Report
=====

```

```

Sorted By      : Signal
Multiplier     : 1.0000
Dilution       : 1.0000
Use Multiplier & Dilution Factor with ISTDs

```

Signal 1: FID1 A,

| Peak # | RetTime [min] | Type | Width [min] | Area [pA*s] | Height [pA] | Area %   |
|--------|---------------|------|-------------|-------------|-------------|----------|
| 1      | 78.877        | MM   | 0.1997      | 1126.74939  | 94.03220    | 95.59128 |
| 2      | 79.318        | MM   | 0.1425      | 51.96627    | 6.07661     | 4.40872  |

Injection Date : 21-Oct-13 7:57:51 PM  
 Sample Name : dg1493  
 Acq. Operator : dg  
 Location : Vial 1  
 Inj : 1  
 Inj Volume : 1 µl  
 Acq. Method : C:\HPCHEM\1\METHODS\60-1.M  
 Last changed : 19-Mar-13 8:33:19 PM by LH  
 Analysis Method : C:\HPCHEM\1\METHODS\140-150.M  
 Last changed : 18-Nov-13 1:39:01 PM by pg  
 (modified after loading)

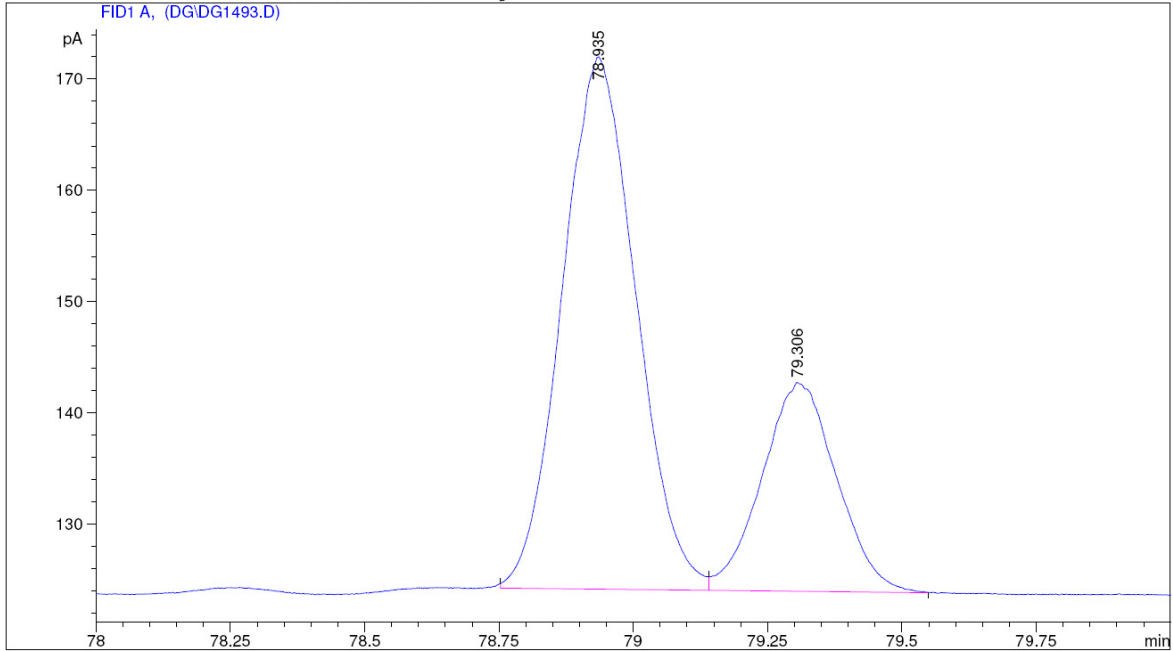

=====  
 Area Percent Report  
 =====

Sorted By : Signal  
 Multiplier : 1.0000  
 Dilution : 1.0000  
 Use Multiplier & Dilution Factor with ISTDs

Signal 1: FID1 A,

| Peak # | RetTime [min] | Type | Width [min] | Area [pA*s] | Height [pA] | Area %   |
|--------|---------------|------|-------------|-------------|-------------|----------|
| 1      | 78.935        | BV   | 0.1252      | 456.17191   | 47.86106    | 71.53850 |
| 2      | 79.306        | VB   | 0.1177      | 181.48737   | 18.78806    | 28.46150 |

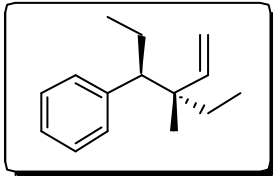

```

-----
Injection Date   : 02-Oct-13 4:28:44 PM
Sample Name     : GR1469
Acq. Operator  : DG
Location       : Vial 3
Inj           : 1
Inj Volume    : 1 µl

Acq. Method    : C:\HPCHEM\1\METHODS\60-1-140.M
Last changed   : 02-Oct-13 4:27:02 PM by DG
                (modified after loading)
Analysis Method : C:\HPCHEM\1\METHODS\140-150.M
Last changed   : 18-Nov-13 12:55:44 PM by pg
                (modified after loading)
-----

```

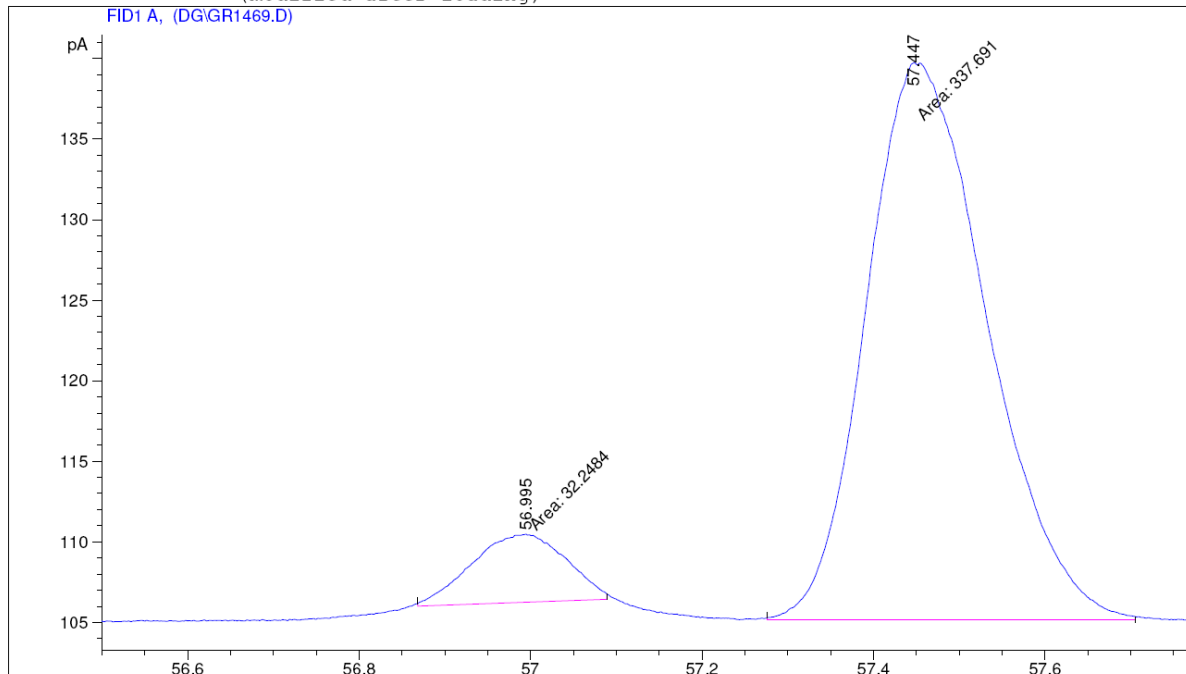

```

=====
                          Area Percent Report
=====

```

```

Sorted By           :      Signal
Multiplier          :      1.0000
Dilution            :      1.0000
Use Multiplier & Dilution Factor with ISTDs

```

Signal 1: FID1 A,

| Peak # | RetTime [min] | Type | Width [min] | Area [pA*s] | Height [pA] | Area %   |
|--------|---------------|------|-------------|-------------|-------------|----------|
| 1      | 56.995        | MM   | 0.1274      | 32.24837    | 4.21860     | 8.71719  |
| 2      | 57.447        | MM   | 0.1627      | 337.69147   | 34.60181    | 91.28281 |



```

=====
Injection Date   : 20-Sep-13 9:35:26 PM           Seq. Line :    2
Sample Name     : gr1425                         Location  : Vial 2
Acq. Operator  : DG                             Inj      :    1
                                           Inj Volume: 1 µl

Acq. Method    : C:\HPCHEM\1\METHODS\60-1.M
Last changed   : 19-Mar-13 8:33:19 PM by LH
Analysis Method: C:\HPCHEM\1\METHODS\140-150.M
Last changed   : 18-Nov-13 1:39:48 PM by pg
                (modified after loading)
=====

```

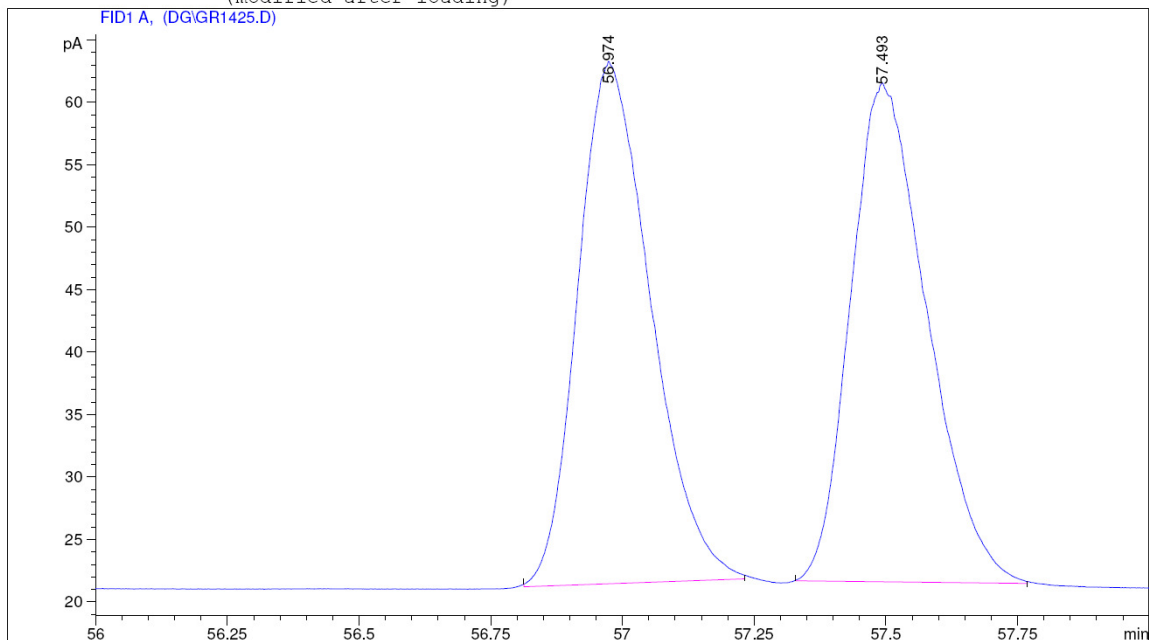

=====  
Area Percent Report  
=====

```

Sorted By      :      Signal
Multiplier    :      1.0000
Dilution      :      1.0000
Use Multiplier & Dilution Factor with ISTDs

```

Signal 1: FID1 A,

| Peak # | RetTime [min] | Type | Width [min] | Area [pA*s] | Height [pA] | Area %   |
|--------|---------------|------|-------------|-------------|-------------|----------|
| 1      | 56.974        | BB   | 0.1375      | 402.33231   | 41.72952    | 49.98594 |
| 2      | 57.493        | BB   | 0.1216      | 402.55859   | 39.92019    | 50.01406 |

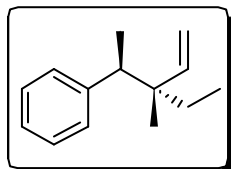

```

=====
Injection Date   : 27-Sep-13 4:24:29 PM
Sample Name     : 1460
Acq. Operator   : DG
Location        : Vial 1
Inj             : 1
Inj Volume      : 1 µl
Acq. Method     : C:\HPCHEM\1\METHODS\60-1-140.M
Last changed    : 18-Apr-12 5:02:59 PM by DM
Analysis Method : C:\HPCHEM\1\METHODS\140-150.M
Last changed    : 18-Nov-13 12:52:47 PM by pg
                 (modified after loading)
=====

```

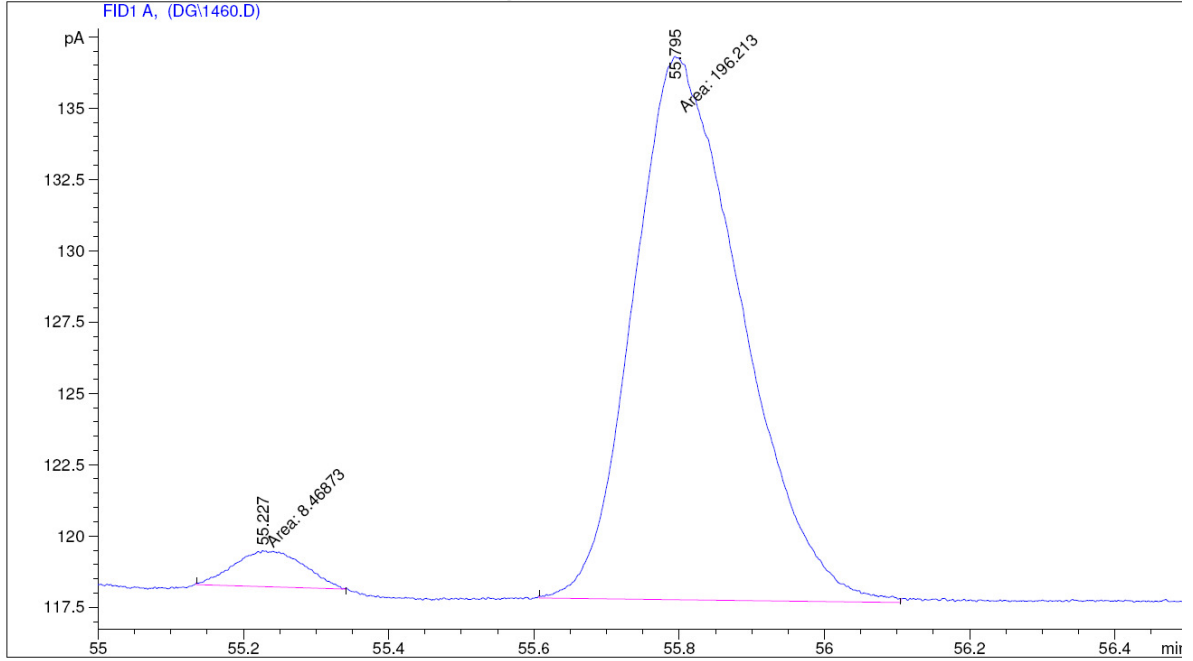

=====  
Area Percent Report  
=====

```

Sorted By      : Signal
Multiplier     : 1.0000
Dilution       : 1.0000
Use Multiplier & Dilution Factor with ISTDs

```

Signal 1: FID1 A,

| Peak # | RetTime [min] | Type | Width [min] | Area [pA*s] | Height [pA] | Area %   |
|--------|---------------|------|-------------|-------------|-------------|----------|
| 1      | 55.227        | MM   | 0.1116      | 8.46873     | 1.26523     | 4.13751  |
| 2      | 55.795        | MM   | 0.1716      | 196.21310   | 19.05769    | 95.86249 |

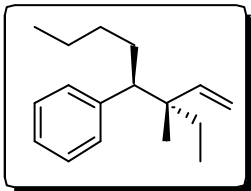

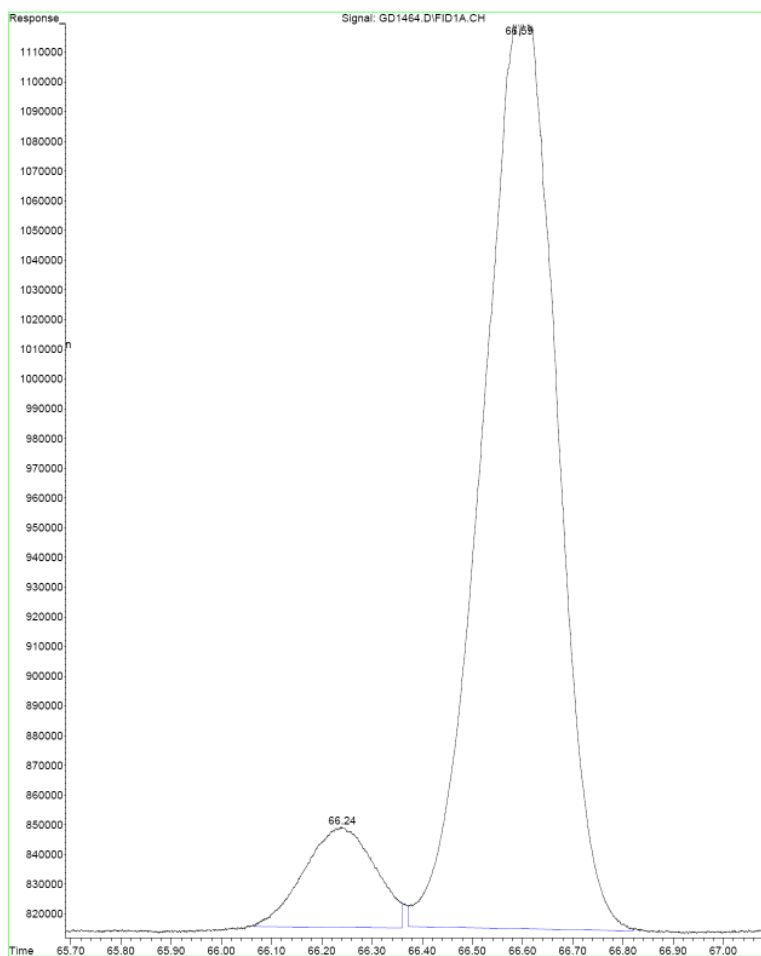

Signal : FID1A.CH

| Peak #                  | R.T. min | Start min | End min | PK TY | peak height | peak area | peak % max. | % of total |
|-------------------------|----------|-----------|---------|-------|-------------|-----------|-------------|------------|
| 1                       | 66.238   | 66.067    | 66.360  | M     | 33778       | 3299134   | 10.33%      | 9.366%     |
| 2                       | 66.590   | 66.372    | 66.820  | M     | 306724      | 31925474  | 100.00%     | 90.634%    |
| Sum of corrected areas: |          |           |         |       |             | 35224608  |             |            |

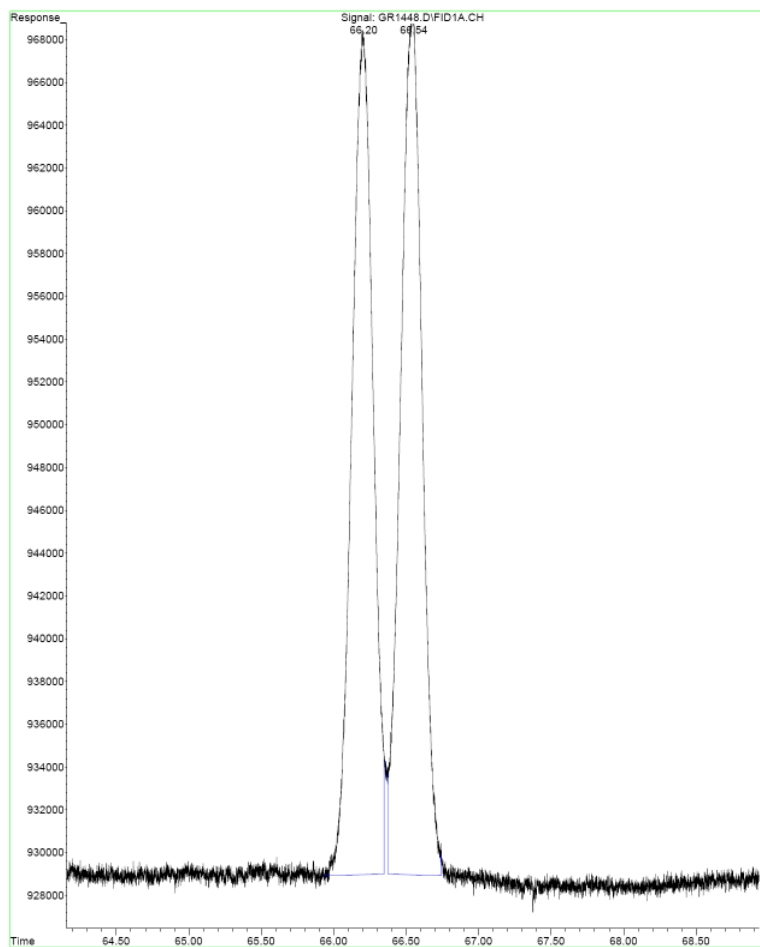

| peak #                  | R.T. min | Start min | End min | PK TY | peak height | peak area | peak % max. | % of total |
|-------------------------|----------|-----------|---------|-------|-------------|-----------|-------------|------------|
| 1                       | 66.197   | 65.964    | 66.328  | M     | 39024       | 3846647   | 89.95%      | 47.356%    |
| 2                       | 66.542   | 66.336    | 66.751  | M     | 40564       | 4276210   | 100.00%     | 52.644%    |
| Sum of corrected areas: |          |           |         |       |             |           | 8122856     |            |

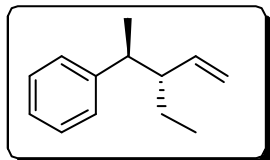

```

=====
Injection Date   : 28-Nov-13 6:39:10 PM
Sample Name     : dg1535
Acq. Operator   : dg
Location        : Vial 1
Inj             : 1
Inj Volume     : 1 µl

Acq. Method     : C:\HPCHEM\1\METHODS\60-1.M
Last changed    : 19-Mar-13 8:33:19 PM by LH
Analysis Method : C:\HPCHEM\1\METHODS\110-1.M
Last changed    : 01-Dec-13 4:32:12 PM by stef
                  (modified after loading)
=====

```

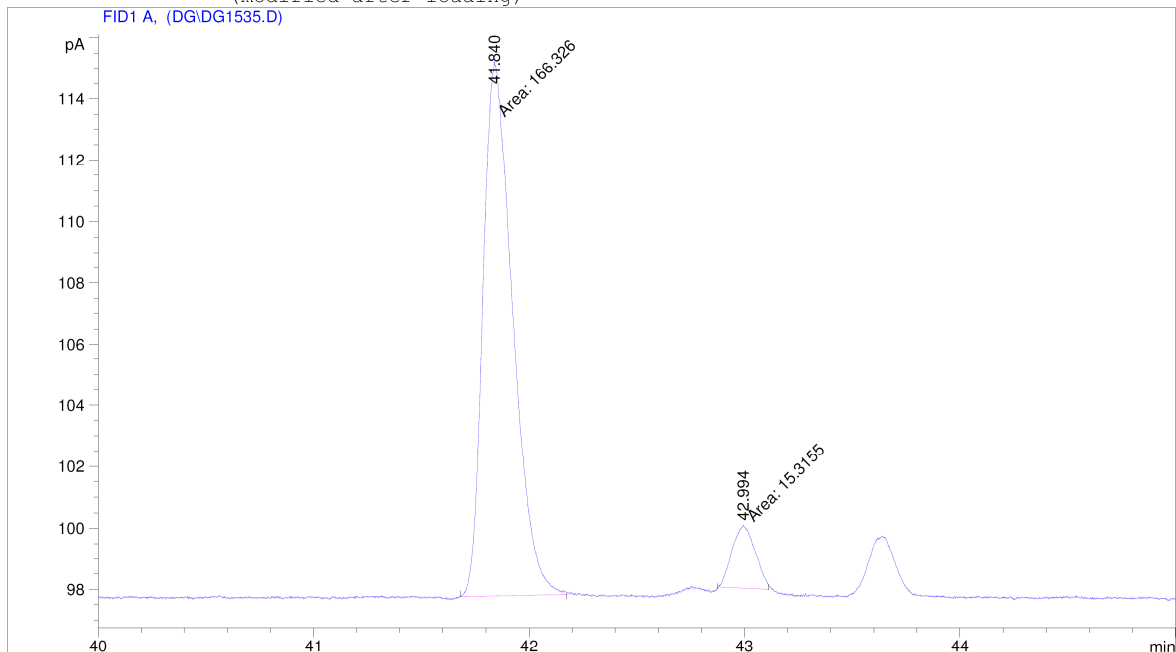

```

=====
                          Area Percent Report
=====

```

```

Sorted By          :      Signal
Multiplier         :      1.0000
Dilution          :      1.0000
Use Multiplier & Dilution Factor with ISTDs

```

Signal 1: FID1 A,

| Peak # | RetTime [min] | Type | Width [min] | Area [pA*s] | Height [pA] | Area %   |
|--------|---------------|------|-------------|-------------|-------------|----------|
| 1      | 41.840        | MM   | 0.1590      | 166.32570   | 17.43860    | 91.56828 |
| 2      | 42.994        | MM   | 0.1239      | 15.31548    | 2.06020     | 8.43172  |

```
Totals :                      181.64118  19.49880
```

```

=====
Injection Date   : 28-Nov-13 9:24:49 PM
Sample Name     : dq1537
Acq. Operator   : dg
Location        : Vial 1
Inj             : 1
Inj Volume      : 1 µl

Acq. Method     : C:\HPCHEM\1\METHODS\60-1.M
Last changed    : 19-Mar-13 8:33:19 PM by LH
Analysis Method : C:\HPCHEM\1\METHODS\110-1.M
Last changed    : 01-Dec-13 4:32:12 PM by stef
                  (modified after loading)
=====

```

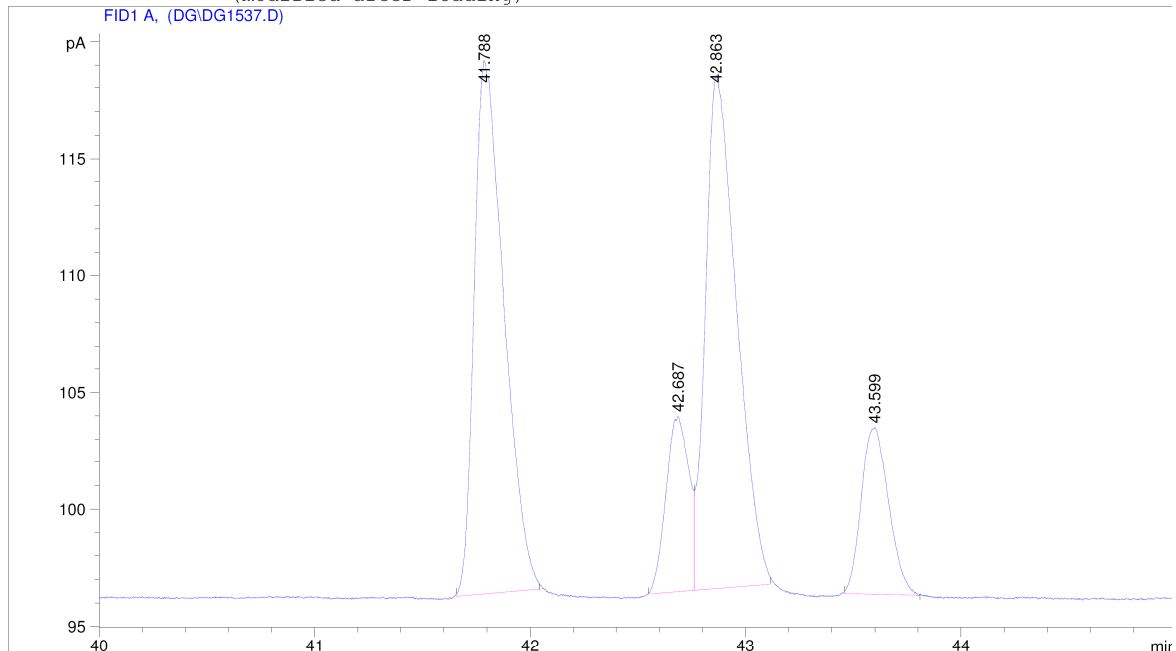

```

=====
Area Percent Report
=====

```

```

Sorted By       : Signal
Multiplier      : 1.0000
Dilution        : 1.0000
Use Multiplier & Dilution Factor with ISTDs

```

Signal 1: FID1 A,

| Peak # | RetTime [min] | Type | Width [min] | Area [pA*s] | Height [pA] | Area %   |
|--------|---------------|------|-------------|-------------|-------------|----------|
| 1      | 41.788        | BB   | 0.1294      | 217.64574   | 22.78954    | 39.08769 |
| 2      | 42.687        | BV   | 0.1047      | 55.04097    | 7.49064     | 9.88498  |
| 3      | 42.863        | VB   | 0.1320      | 221.32780   | 21.88451    | 39.74896 |
| 4      | 43.599        | BB   | 0.1290      | 62.79955    | 7.11193     | 11.27837 |

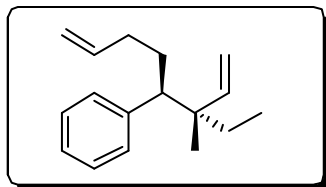

File : C:\MSDCHEM\2\DATA\GR1536.D  
Operator : DG  
Acquired : 28.11.2013 05:40:21 PM using AcqMethod F69-1.M  
Instrument : GC CHIRAL  
Sample Name: GR1536  
Misc Info :  
Vial Number: 1

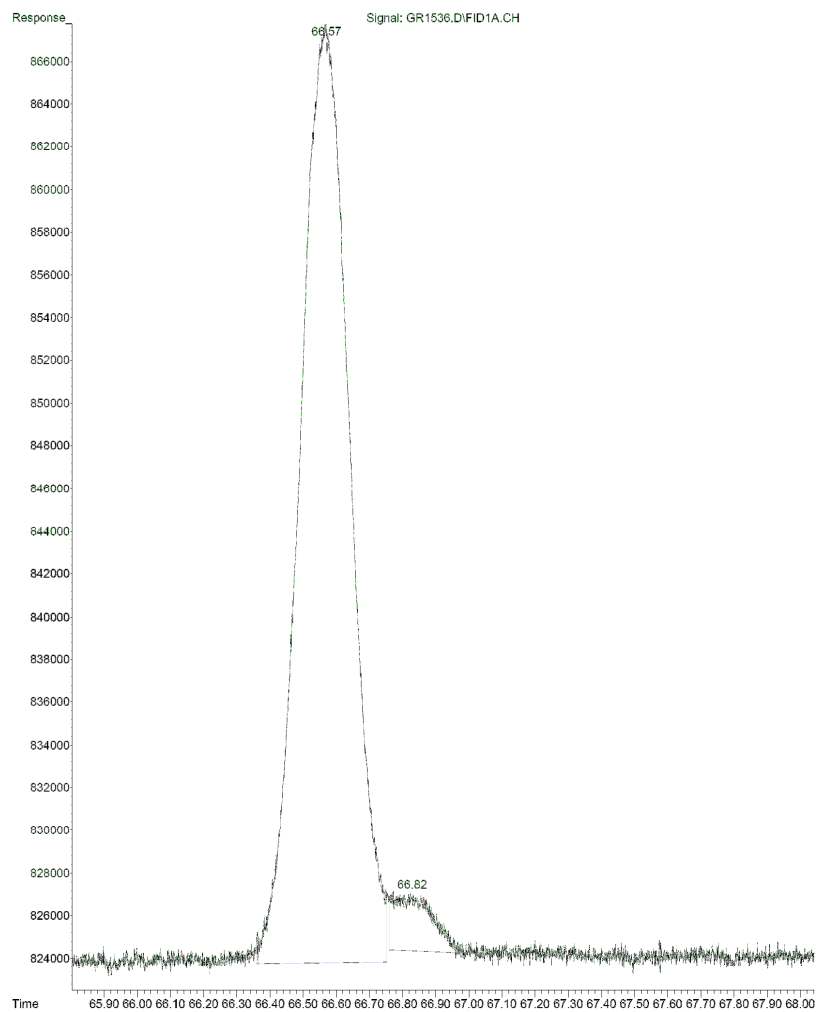

Data Path : C:\MSDCHEM\2\DATA\  
 Data File : GR1536.D  
 Signal(s) : FID1A.CH  
 Acq On : 28.11.2013 05:40:21 PM  
 Sample : GR1536  
 Misc :  
 ALS Vial : 1 Sample Multiplier: 1

Integration File: autoint1.e

Method : C:\MSDCHEM\2\METHODS\F60-1.M  
 Title :

Signal : FID1A.CH

| Peak #                  | R.T. min | Start min | End min | PK TY | peak height | peak area | peak % max. | % of total |
|-------------------------|----------|-----------|---------|-------|-------------|-----------|-------------|------------|
| 1                       | 66.565   | 66.359    | 66.752  | M     | 43999       | 4603993   | 100.00%     | 95.527%    |
| 2                       | 66.824   | 66.760    | 66.975  | M     | 2783        | 215603    | 4.68%       | 4.473%     |
| Sum of corrected areas: |          |           |         |       |             |           | 4819595     |            |

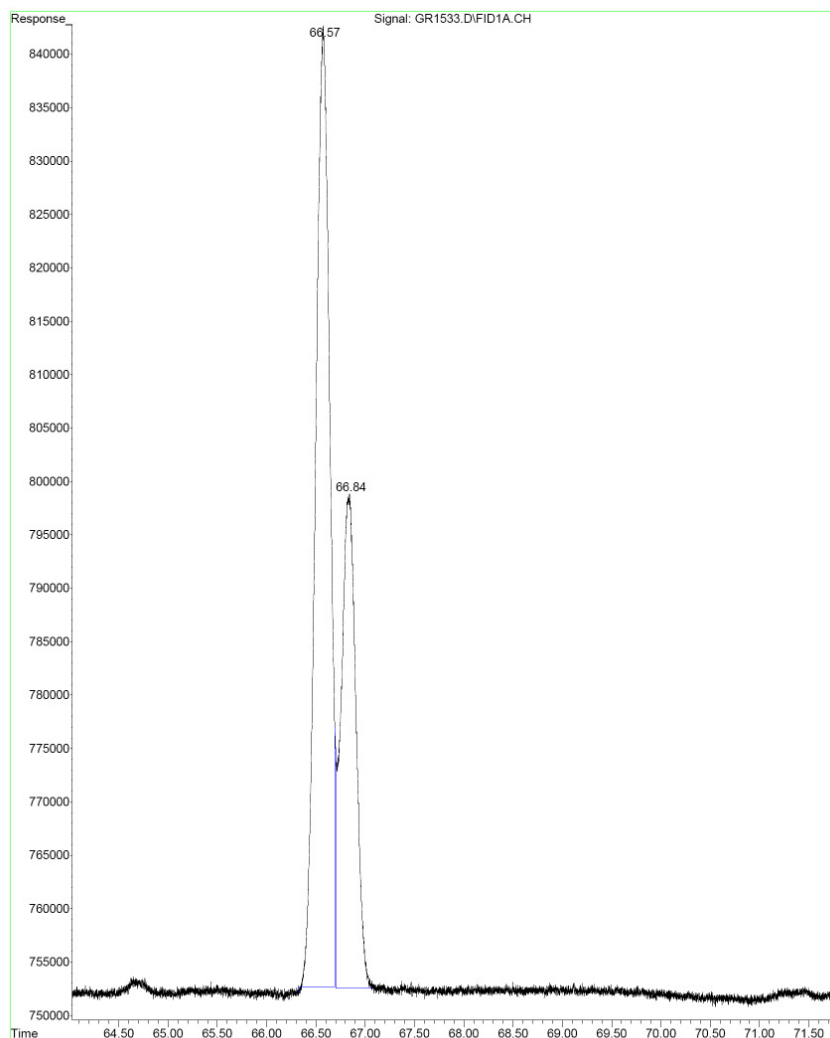



Data Path : C:\MSDCHEM\2\DATA\  
 Data File : GR1533.D  
 Signal(s) : FID1A.CH  
 Acq On : 27.11.2013 03:41:42 PM  
 Sample : GR1533  
 Misc :  
 ALS Vial : 1 Sample Multiplier: 1

Integration File: autoint1.e

Method : C:\MSDCHEM\2\METHODS\F60-1.M  
 Title :

Signal : FID1A.CH

| Peak #                  | R.T. min | Start min | End min | PK TY | peak height | peak area | peak % max. | % of total |
|-------------------------|----------|-----------|---------|-------|-------------|-----------|-------------|------------|
| 1                       | 66.572   | 66.336    | 66.692  | M     | 90013       | 8940768   | 100.00%     | 64.421%    |
| 2                       | 66.839   | 66.699    | 67.069  | M     | 46301       | 4937948   | 55.23%      | 35.579%    |
| Sum of corrected areas: |          |           |         |       |             |           | 13878716    |            |

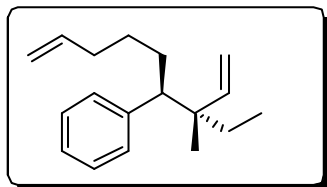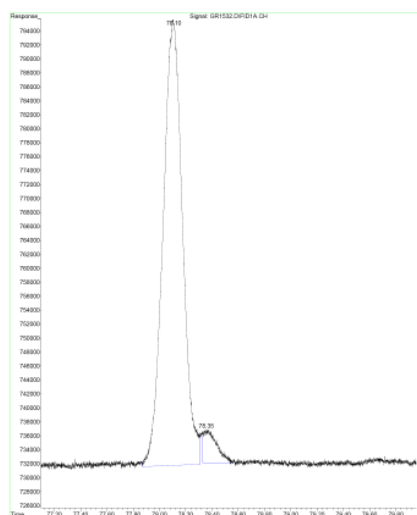

Data Path : C:\MSDCHEM\2\DATA\  
Data File : GR1532.D  
Signal(s) : FID1A.CH  
Acq On : 26.11.2013 04:11:16 PM  
Sample : GR1532  
Misc :  
ALS Vial : 1 Sample Multiplier: 1

Integration File: autoint1.e

Method : C:\MSDCHEM\2\METHODS\F60-1.M  
Title :

Signal : FID1A.CH

| peak # | R.T. min | Start min | End min | PK TY | peak height | peak area | peak % max. | % of total |
|--------|----------|-----------|---------|-------|-------------|-----------|-------------|------------|
| 1      | 78.103   | 77.873    | 78.311  | M     | 63892       | 6603782   | 100.00%     | 95.338%    |
| 2      | 78.350   | 78.331    | 78.544  | M     | 4808        | 322892    | 4.89%       | 4.662%     |

Sum of corrected areas: 6926674

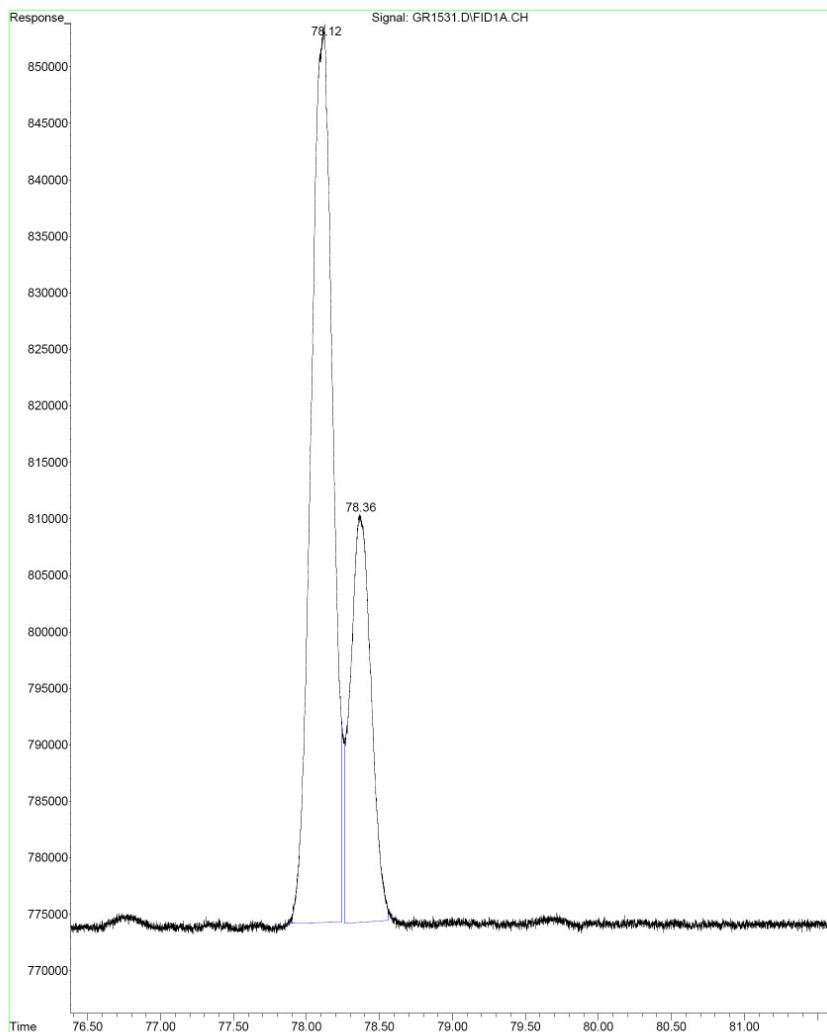

Area Percent Report

Data Path : C:\MSDCHEM\2\DATA\  
 Data File : GR1531.D  
 Signal(s) : FID1A.CH  
 Acq On : 25.11.2013 07:30:11 PM  
 Sample : GR1531  
 Misc :  
 ALS Vial : 1 Sample Multiplier: 1

Integration File: autoint1.e

Method : C:\MSDCHEM\2\METHODS\F60-1.M  
 Title :

Signal : FID1A.CH

| peak #                  | R.T. min | Start min | End min | PK TY | peak height | peak area | peak % max. | % of total |
|-------------------------|----------|-----------|---------|-------|-------------|-----------|-------------|------------|
| 1                       | 78.124   | 77.869    | 78.243  | M     | 79611       | 8180756   | 100.00%     | 69.807%    |
| 2                       | 78.361   | 78.263    | 78.557  | M     | 36090       | 3538330   | 43.25%      | 30.193%    |
| Sum of corrected areas: |          |           |         |       |             |           | 11719085    |            |

F60-1.M Sun Dec 01 16:41:49 2013

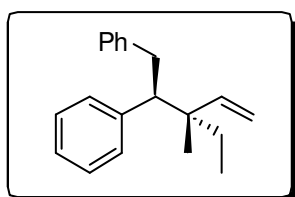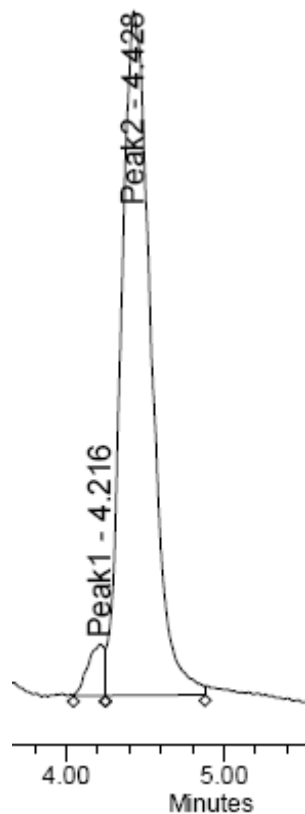

|   | Peak Name | RT    | Area    | % Area | Height |
|---|-----------|-------|---------|--------|--------|
| 1 | Peak1     | 4.216 | 264367  | 3.99   | 36891  |
| 2 | Peak2     | 4.428 | 6364670 | 96.01  | 489515 |

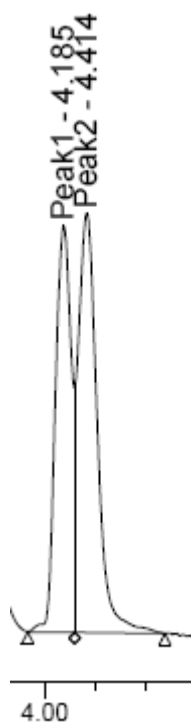

|   | Peak Name | RT    | Area    | % Area | Height |
|---|-----------|-------|---------|--------|--------|
| 1 | Peak1     | 4.185 | 3602181 | 44.23  | 333632 |
| 2 | Peak2     | 4.414 | 4541610 | 55.77  | 344396 |

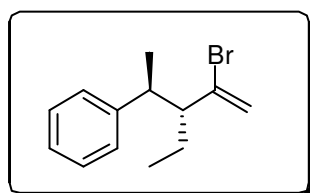

```

=====
Injection Date   : 03-Jan-14 5:26:59 PM
Sample Name     : 1576
Acq. Operator   : dg
Location        : Vial 1
Inj             : 1
Inj Volume     : 1 µl

Acq. Method     : C:\HPCHEM\1\METHODS\60-1-115.M
Last changed    : 03-Jan-14 4:04:33 PM by dg
                  (modified after loading)

Analysis Method : C:\HPCHEM\1\METHODS\60-1.M
Last changed    : 17-Jan-14 4:07:30 PM by pg
                  (modified after loading)
=====

```

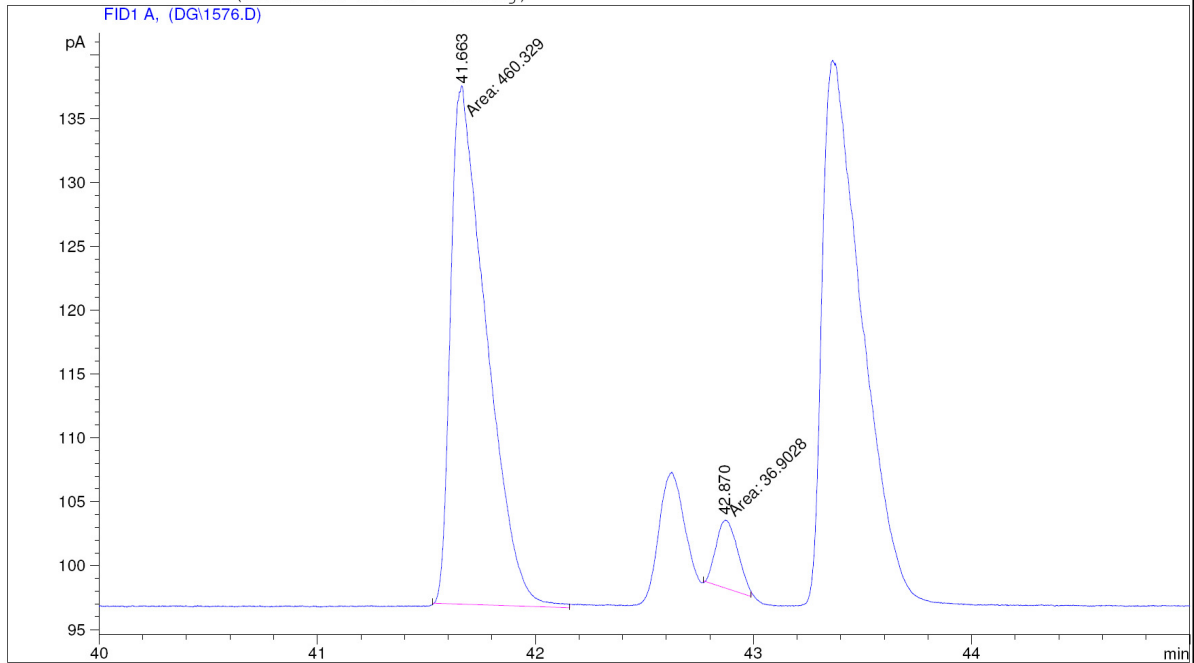

```

=====
Area Percent Report
=====

```

```

Sorted By      : Signal
Multiplier     : 1.0000
Dilution       : 1.0000
Use Multiplier & Dilution Factor with ISTDs

```

Signal 1: FID1 A,

| Peak # | RetTime [min] | Type | Width [min] | Area [pA*s] | Height [pA] | Area %   |
|--------|---------------|------|-------------|-------------|-------------|----------|
| 1      | 41.663        | MM   | 0.1890      | 460.32925   | 40.58437    | 92.57835 |
| 2      | 42.870        | MM   | 0.1157      | 36.90282    | 5.31766     | 7.42165  |

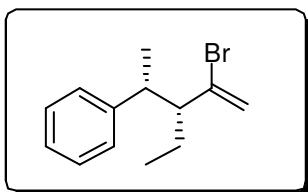

```

=====
Injection Date   : 03-Jan-14 5:26:59 PM
Sample Name     : 1576
Acq. Operator   : dg
Location       : Vial 1
Inj            : 1
Inj Volume     : 1 µl

Acq. Method    : C:\HPCHEM\1\METHODS\60-1-115.M
Last changed   : 03-Jan-14 4:04:33 PM by dg
                (modified after loading)

Analysis Method : C:\HPCHEM\1\METHODS\60-1.M
Last changed   : 17-Jan-14 4:07:30 PM by pg
                (modified after loading)
=====

```

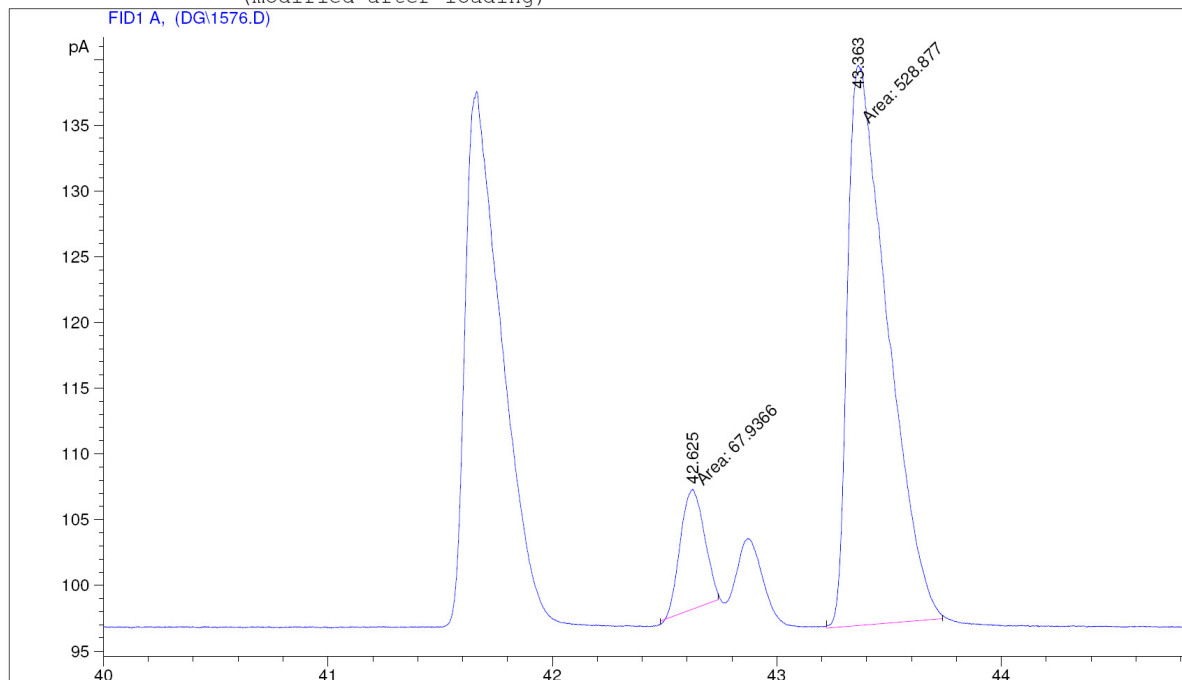

```

=====
                          Area Percent Report
=====

```

```

Sorted By      : Signal
Multiplier    : 1.0000
Dilution      : 1.0000
Use Multiplier & Dilution Factor with ISTDs

```

Signal 1: FID1 A,

| Peak # | RetTime [min] | Type | Width [min] | Area [pA*s] | Height [pA] | Area %   |
|--------|---------------|------|-------------|-------------|-------------|----------|
| 1      | 42.625        | MM   | 0.1238      | 67.93656    | 9.14555     | 11.38321 |
| 2      | 43.363        | MM   | 0.2068      | 528.87720   | 42.61638    | 88.61679 |

```
Totals :                      596.81376  51.76193
```

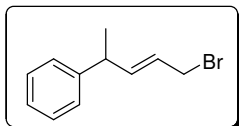

QUICK\_1H CDCl3 /opt/topspin3.2\data/alexakis toto 8

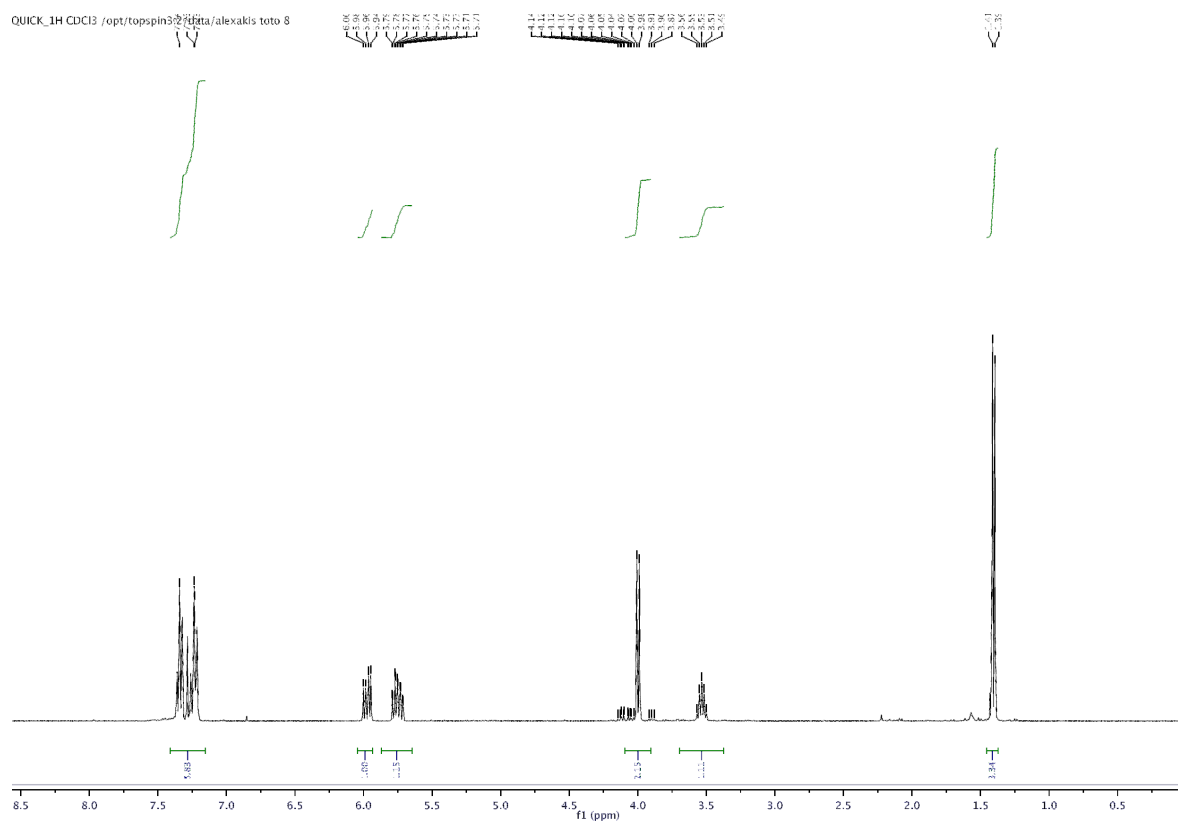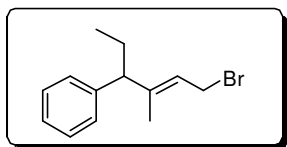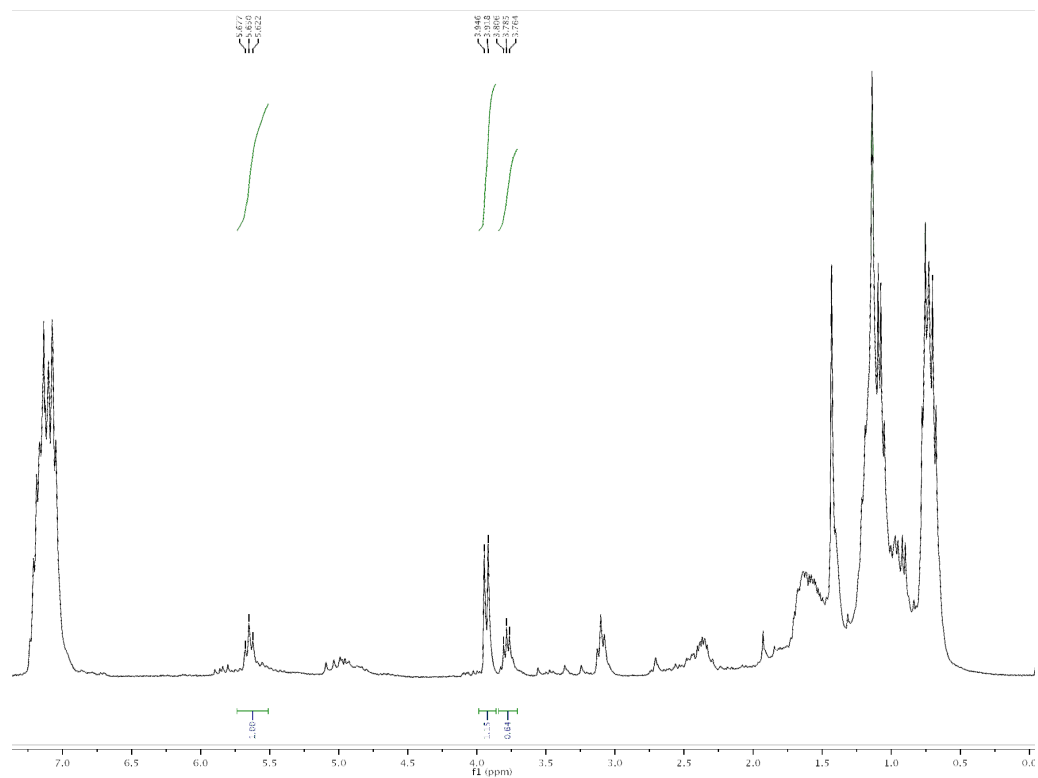

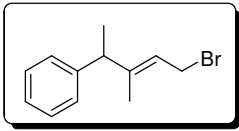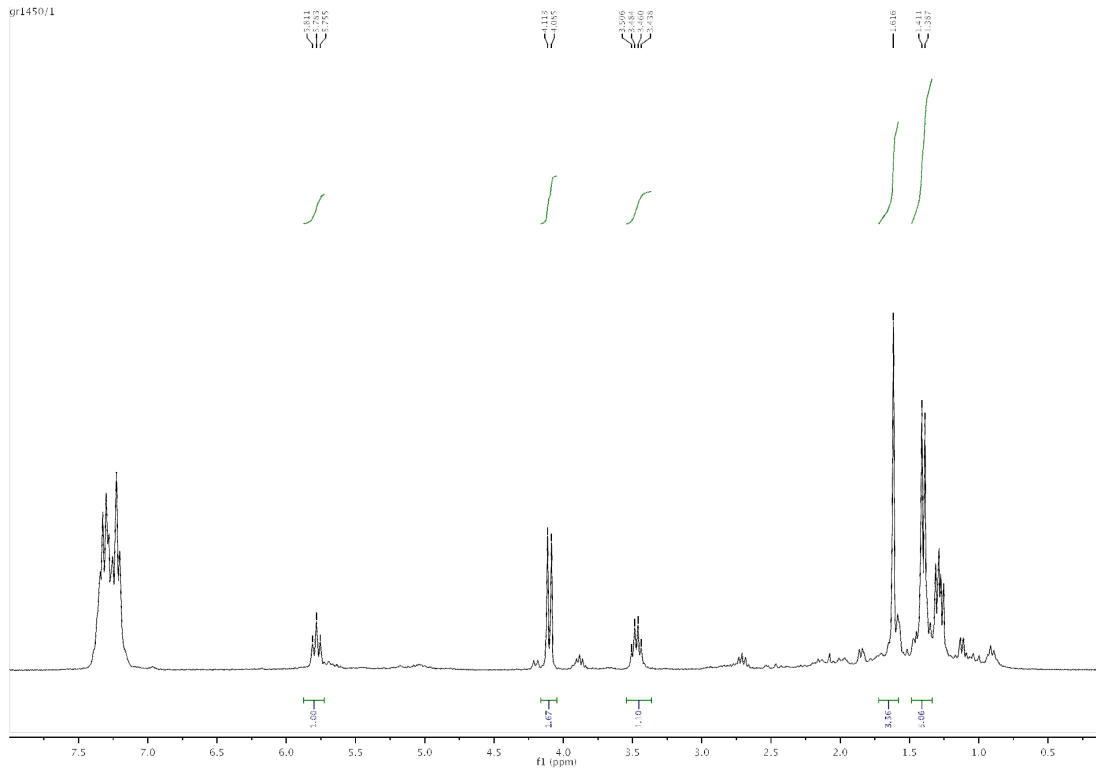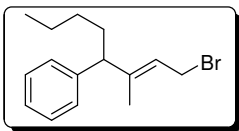



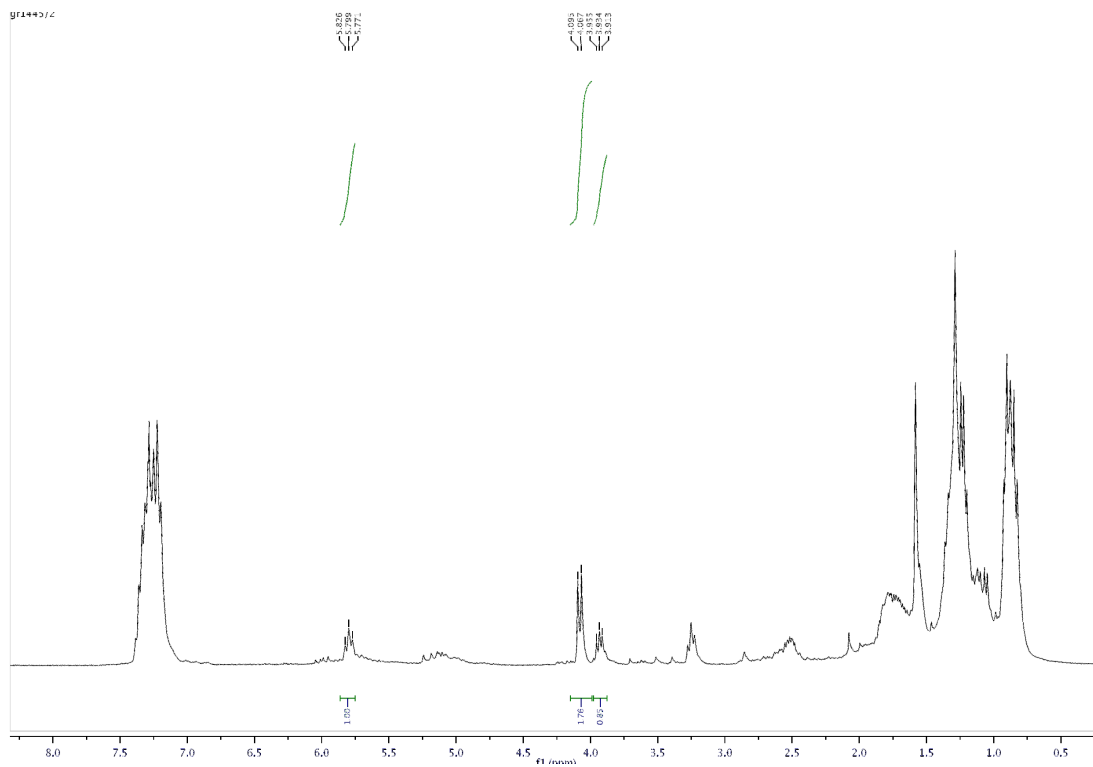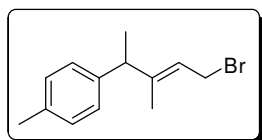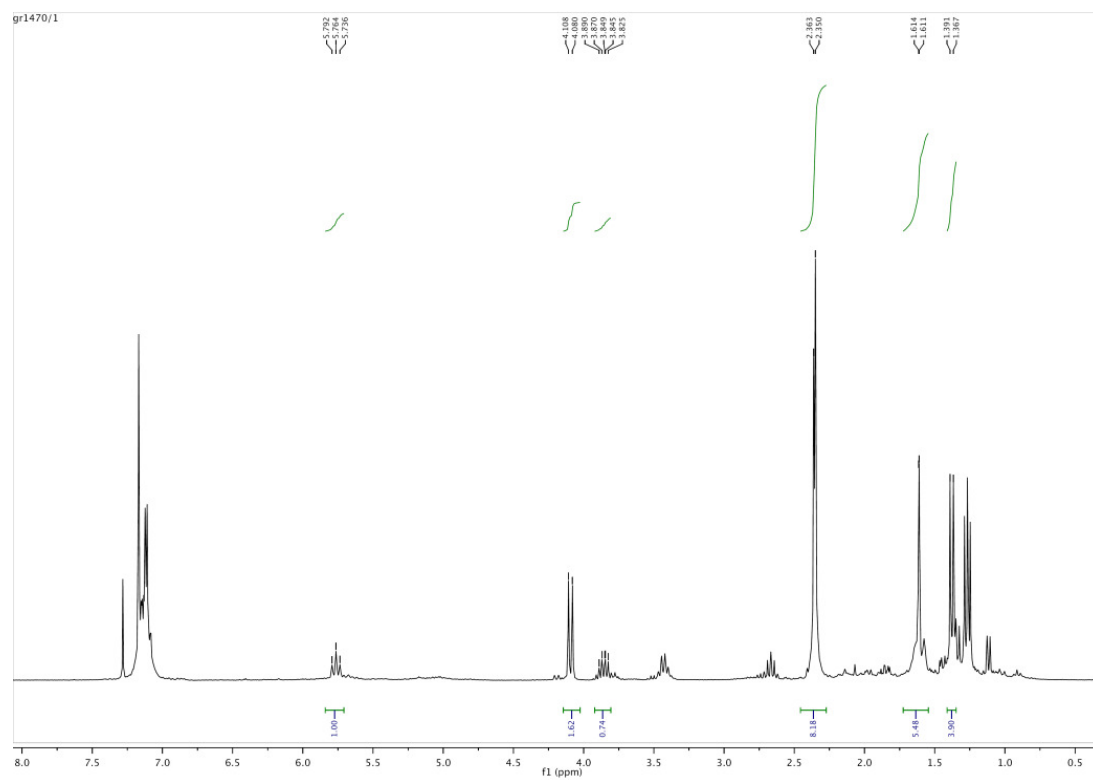

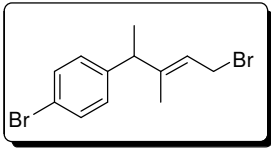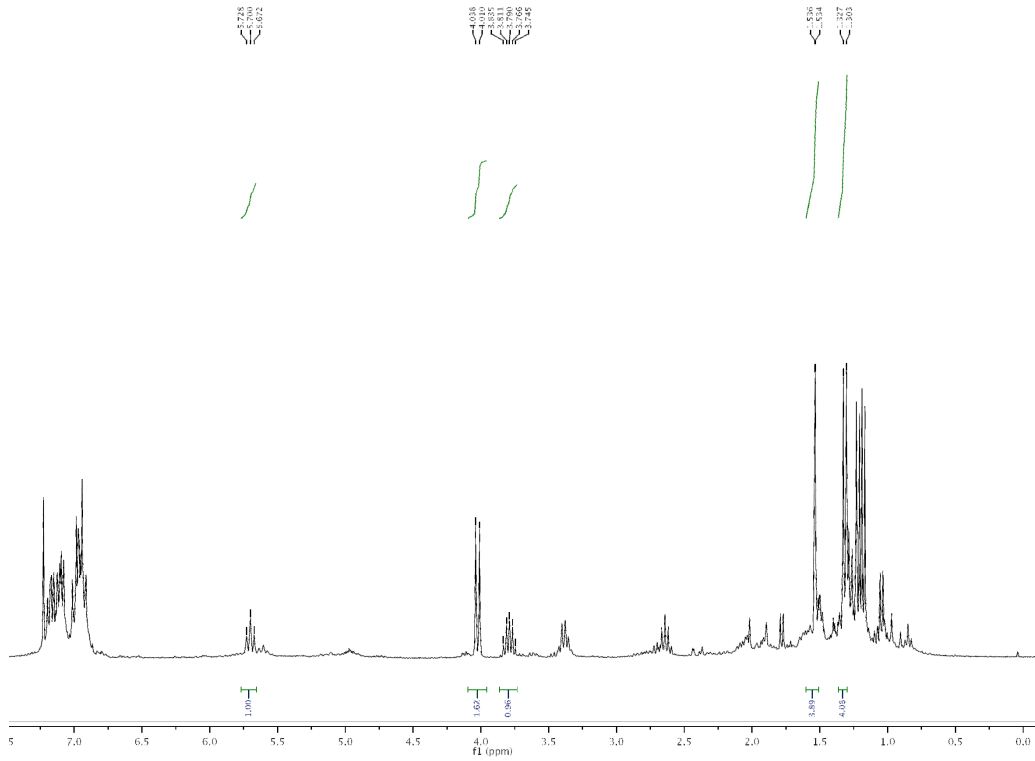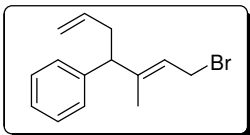

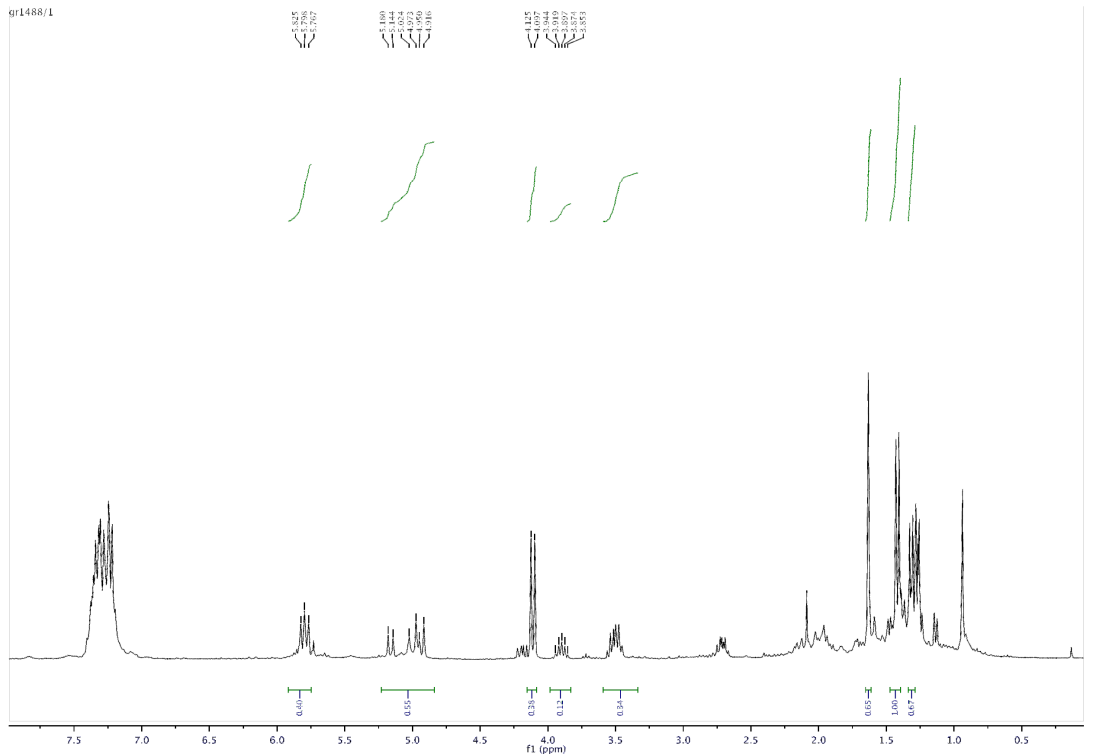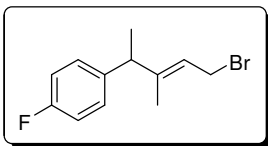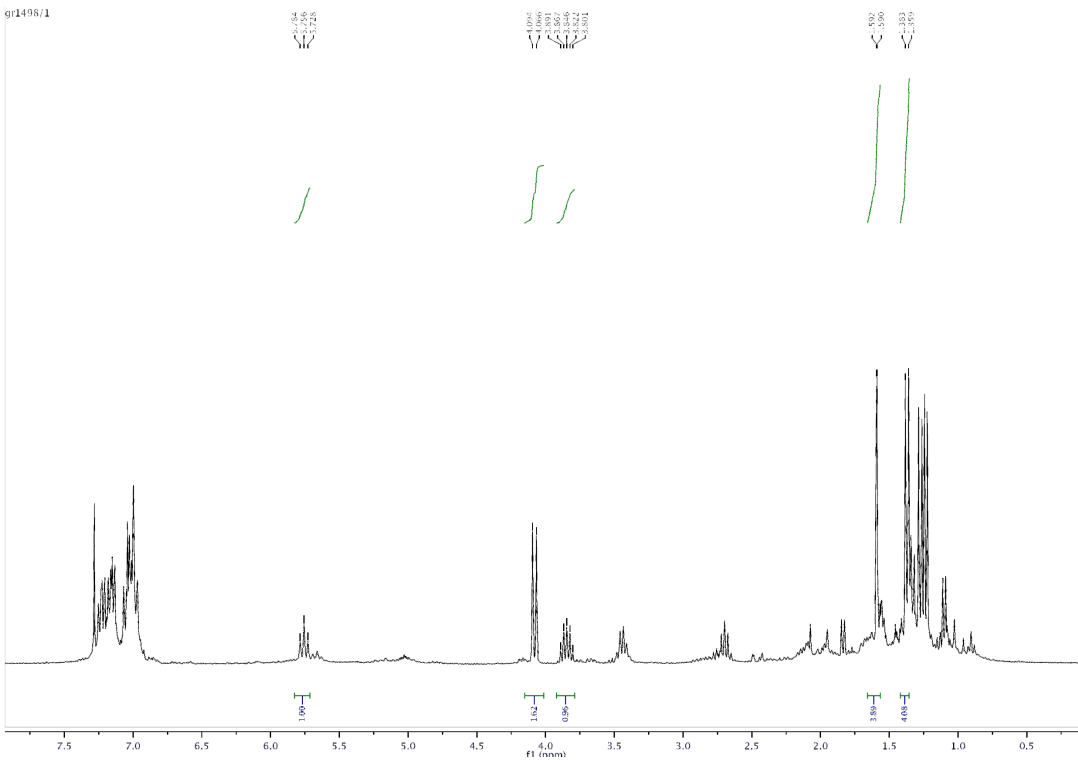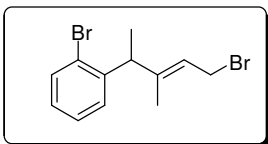

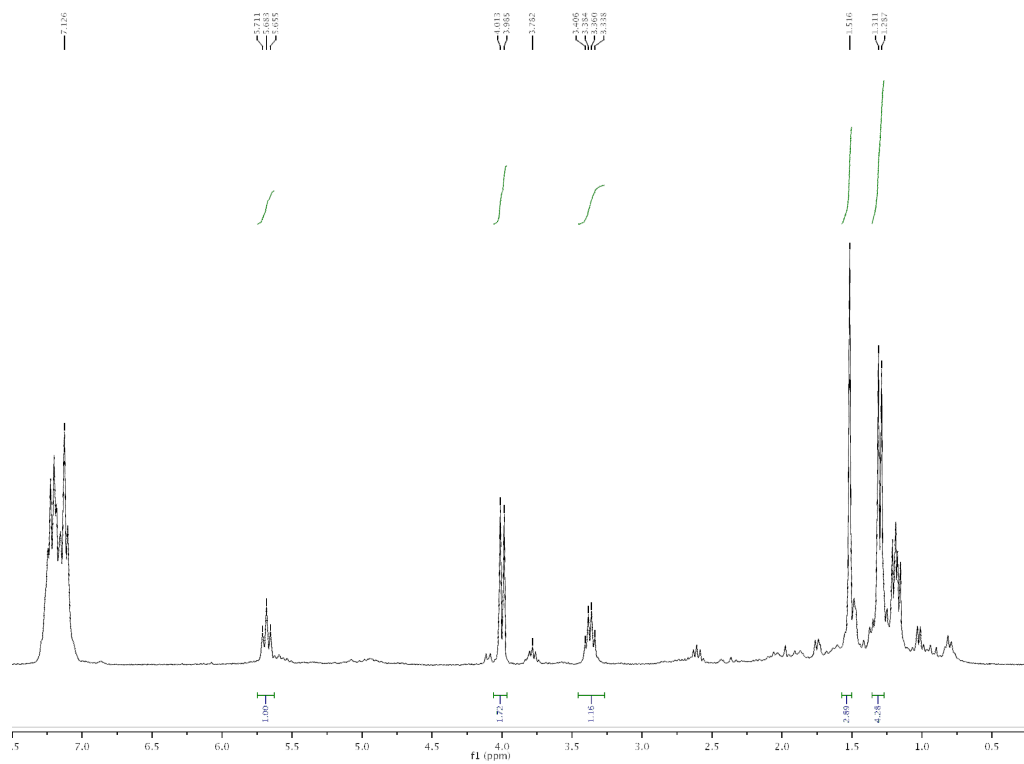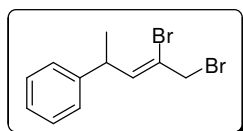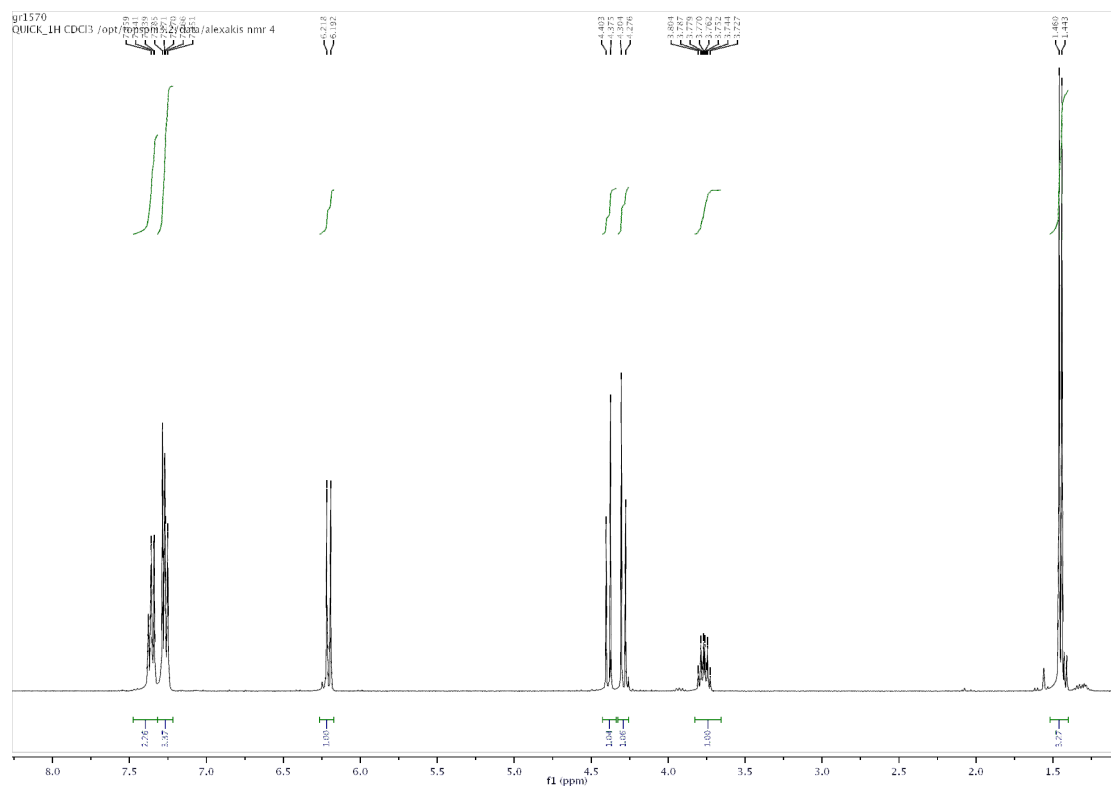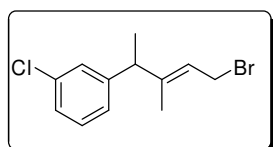

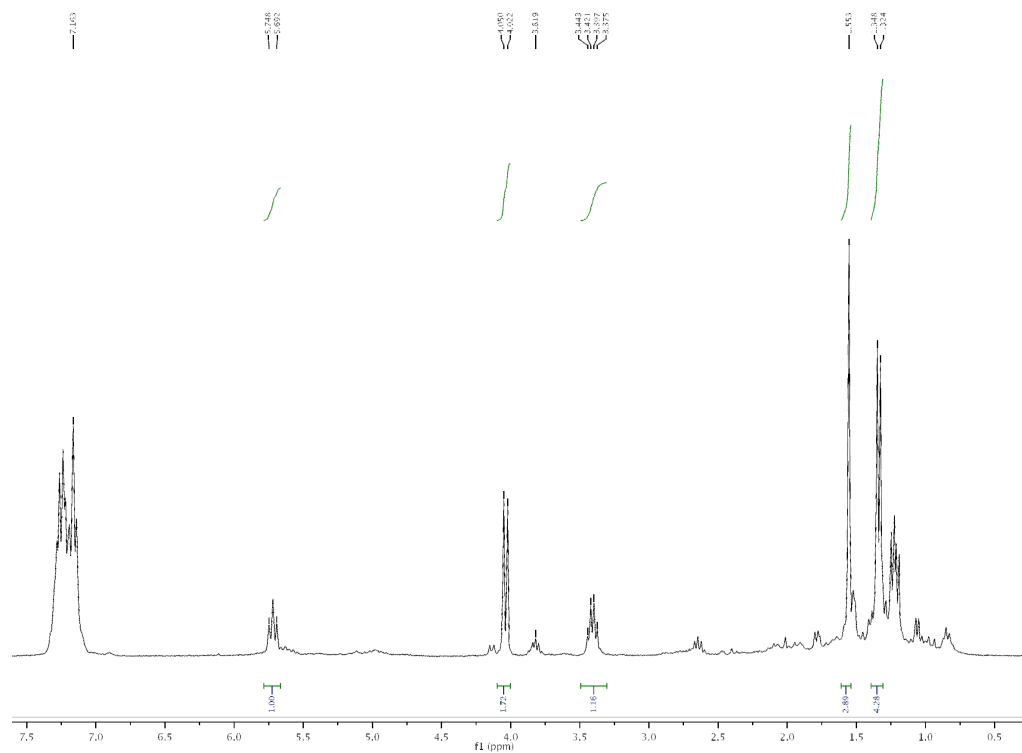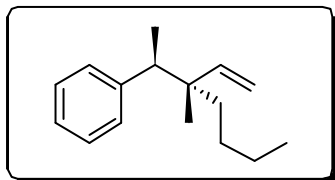

gr1415.11.fid  
QUICK\_1H CDC13 /opt/topspin3.2/data/alexakis nmr 6

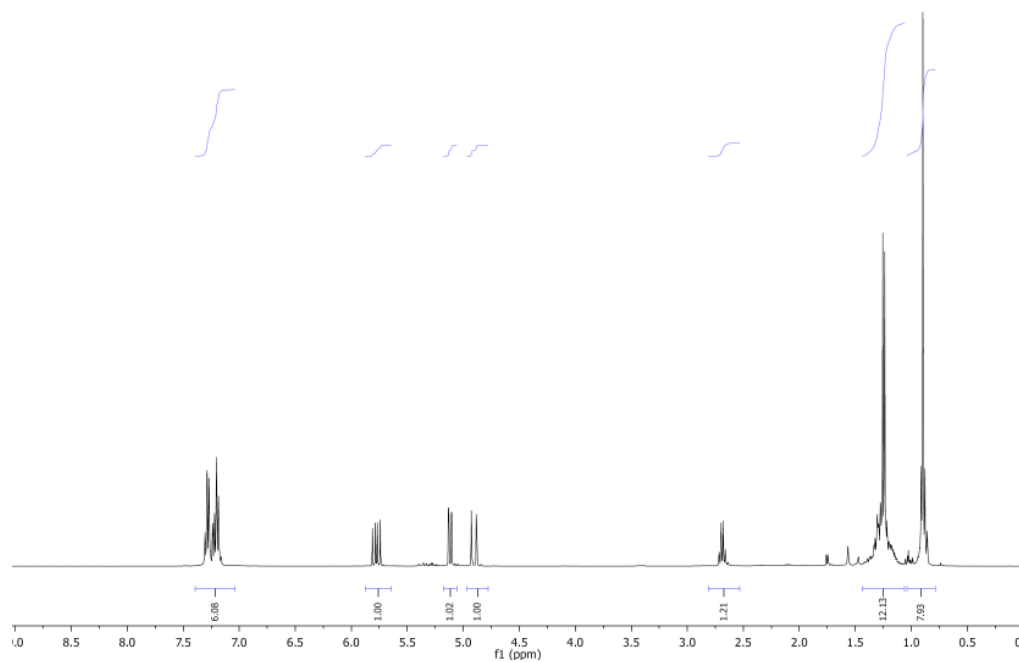

gr1415.12.fid  
QUICK\_13C CDC13 /opt/topspin3.2/data/alexakis nmr 6

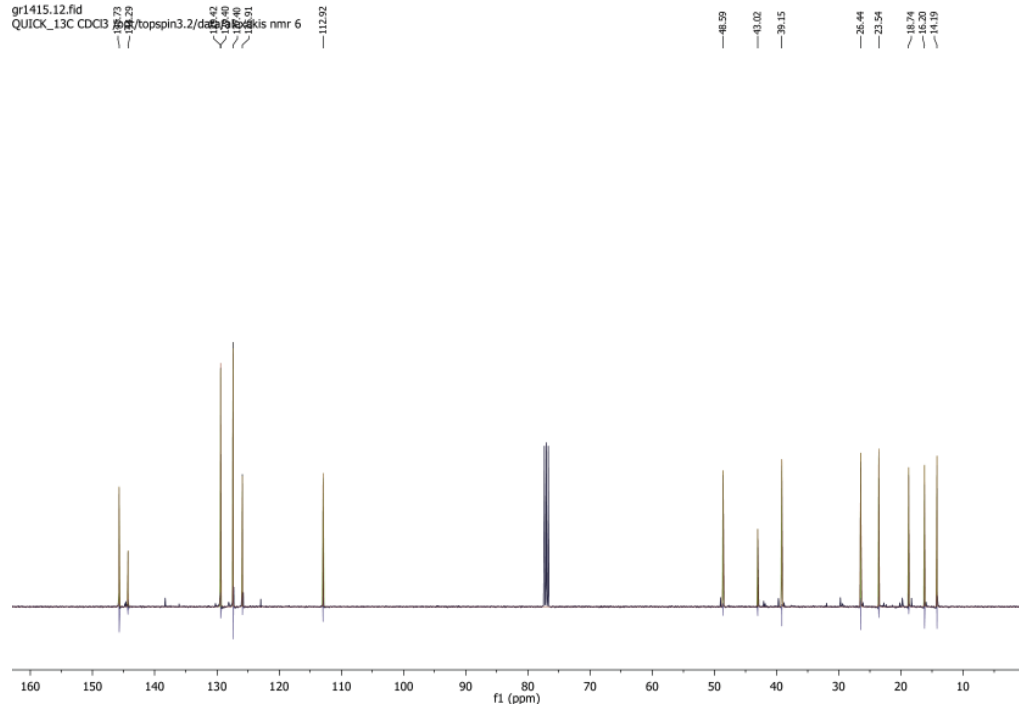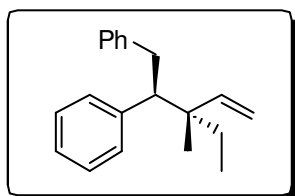

gr1421.2.fid

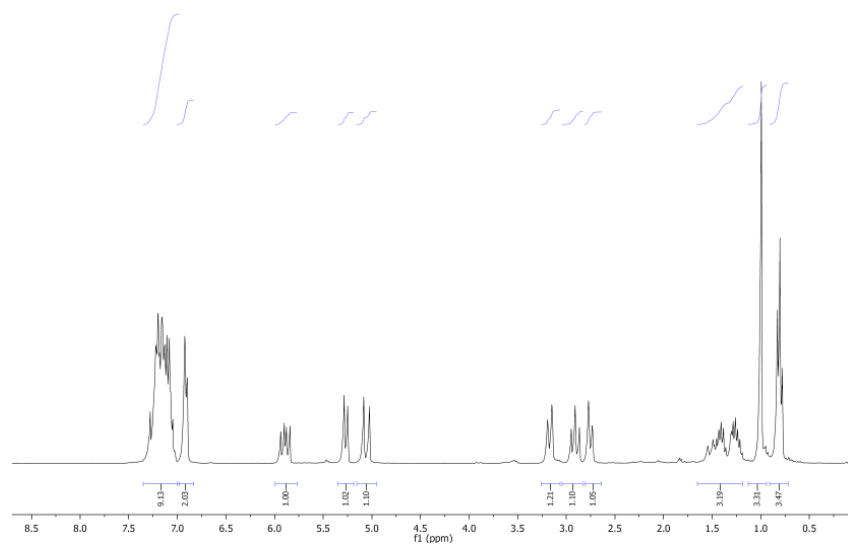

gr1421f2.111.fid  
QUICK\_13C CDCl3 /opt/topspin3.2/data/alexakis nmr 6

146.07  
141.81  
141.26  
130.77  
129.82  
127.93  
125.34  
113.96

57.61  
44.10  
36.62  
32.38  
17.64  
8.57

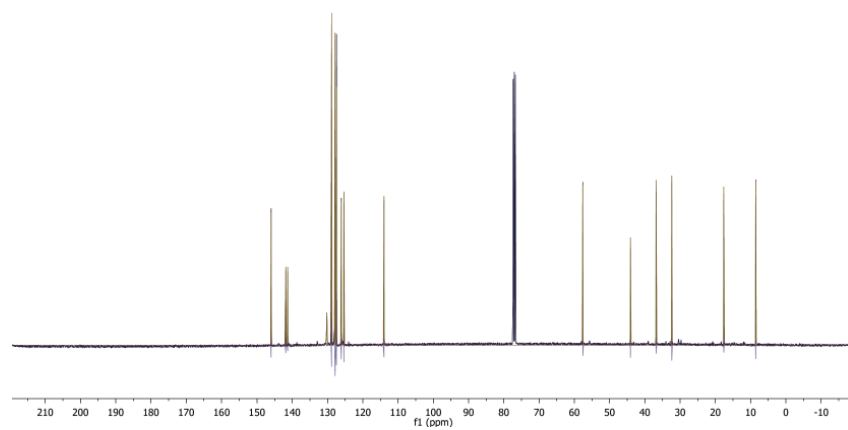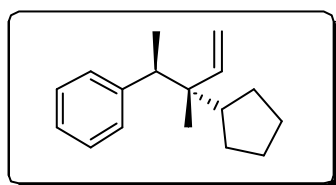

gr1416.13.fid  
PROTON CDCl3 /opt/topspin3.2/data/alexakis nmr 7

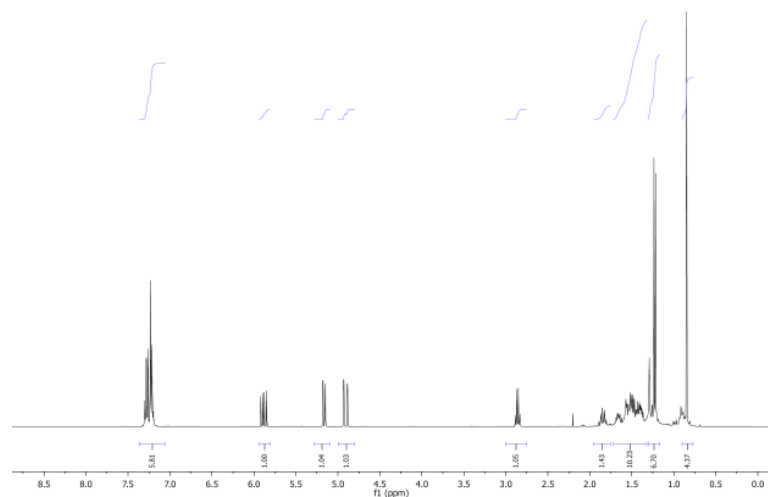

gr1416.12.fid  
QUICK\_13C CDCl3 /opt/topspin3.2/data/alexakis nmr 7

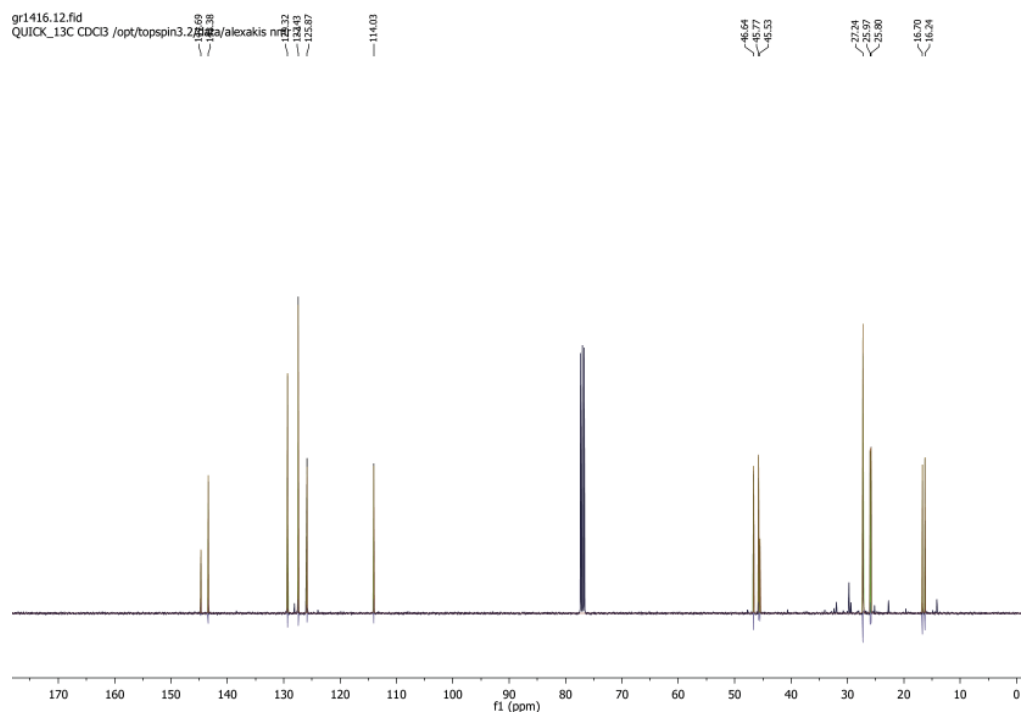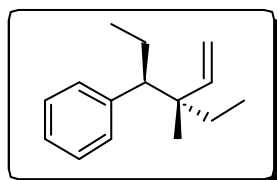



gr1425.10.fid  
PROTON CDCl3 /opt/topspin3.2/data/alexakis nmr 5

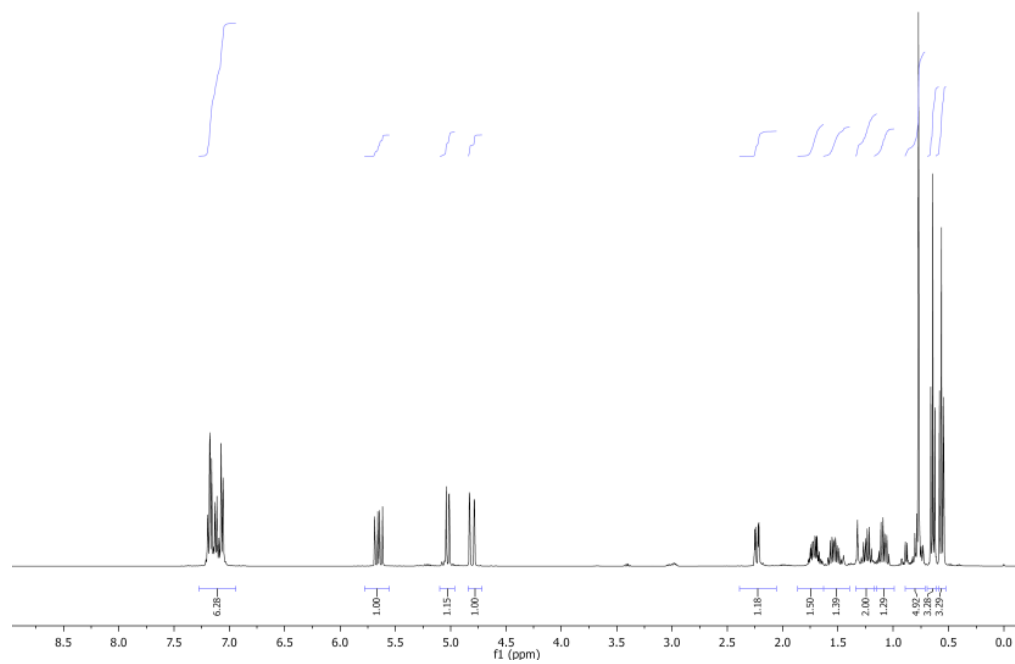

gr1425.11.fid  
C13CPD CDCl3 /opt/topspin3.2/data/alexakis nmr 5

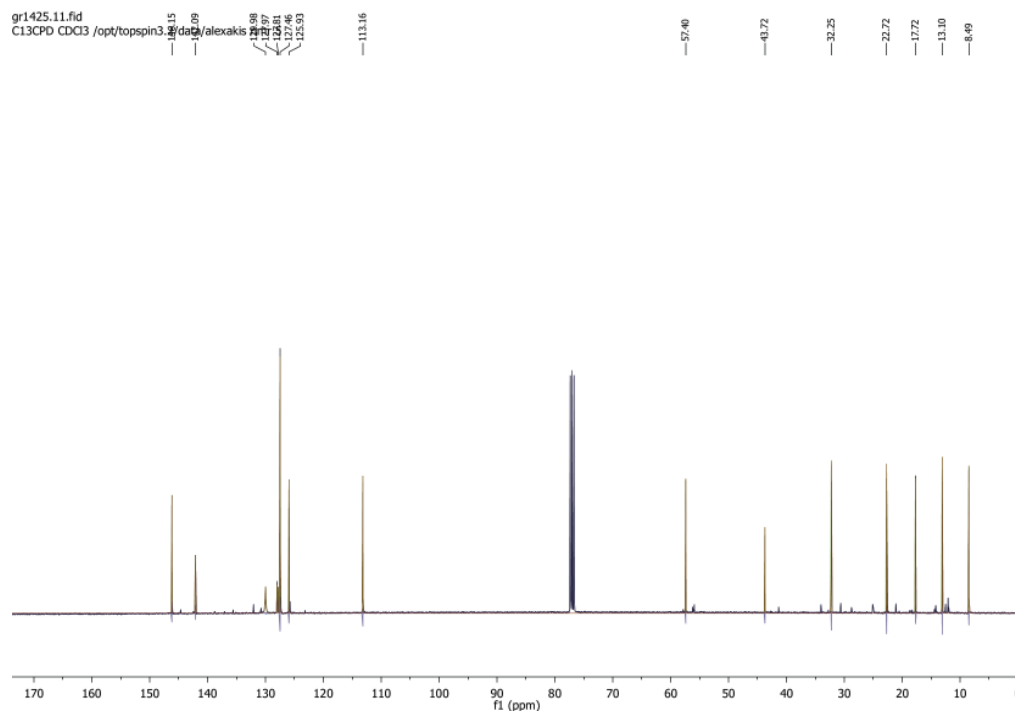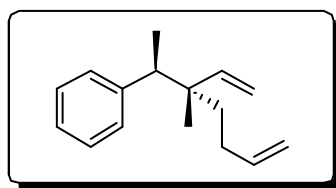

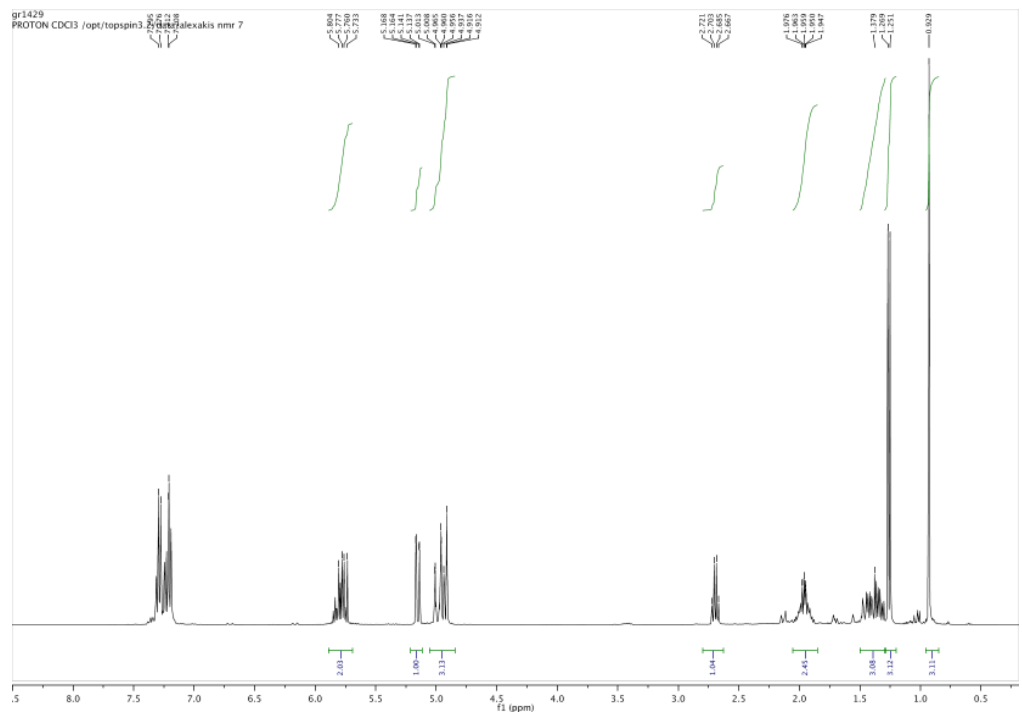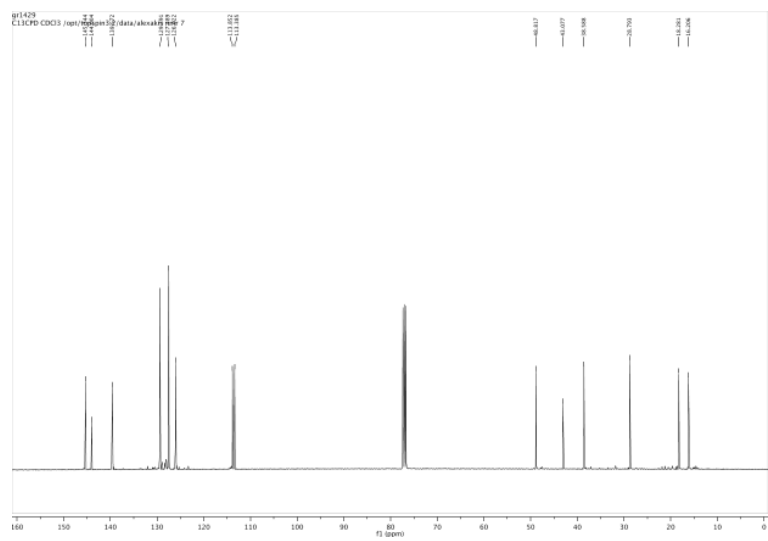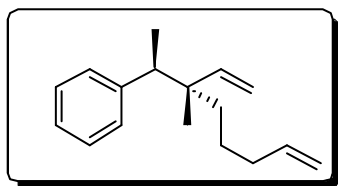







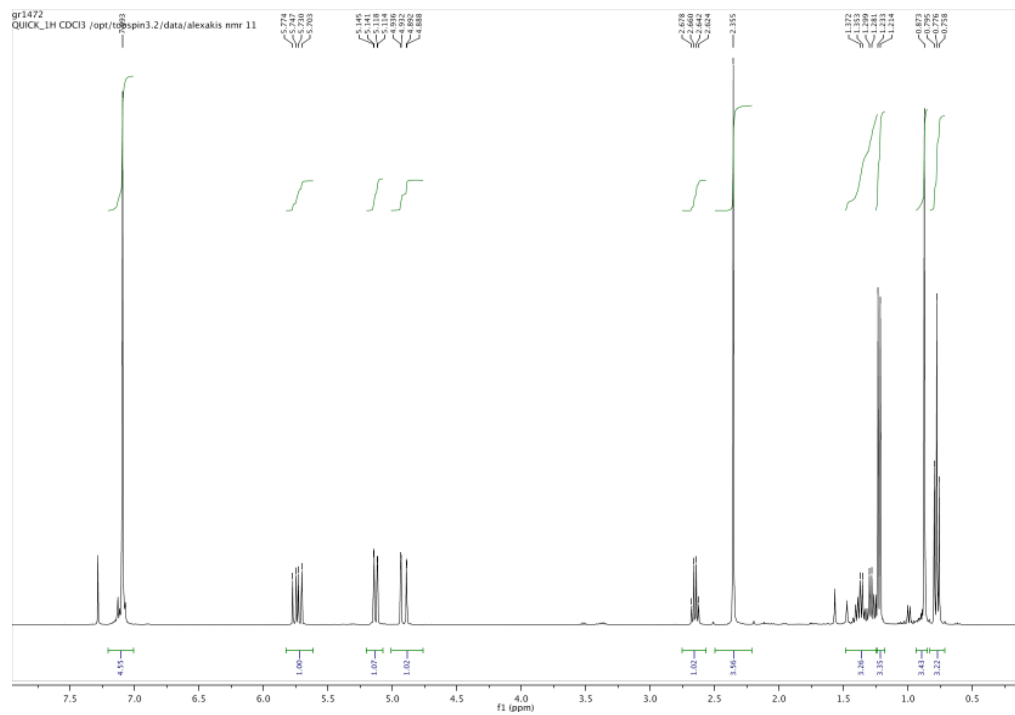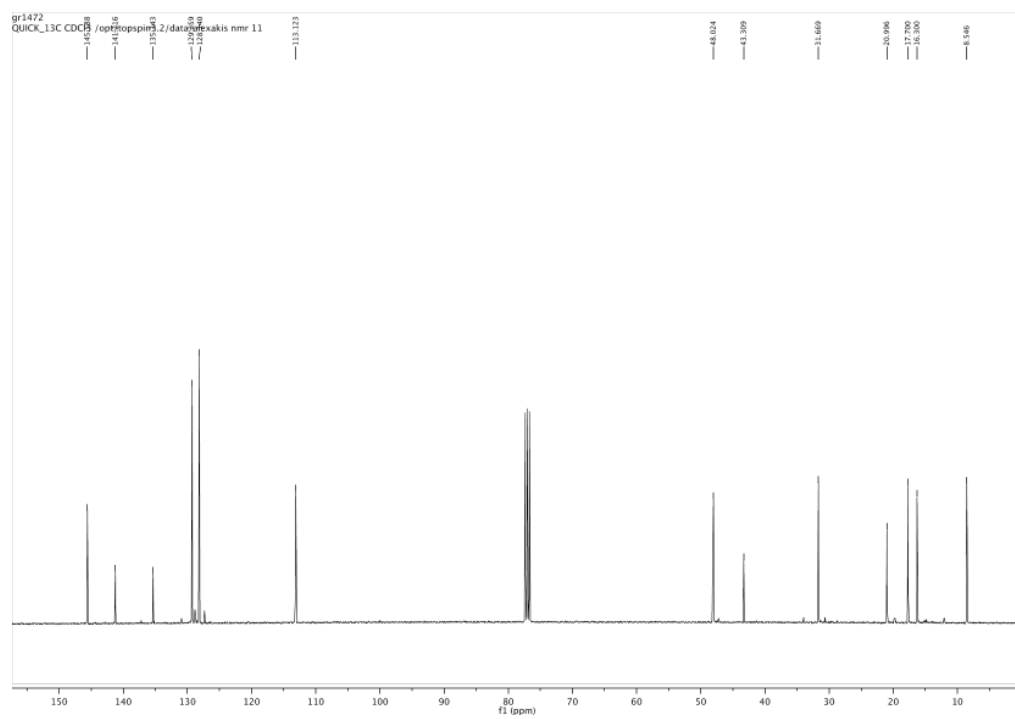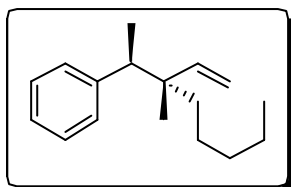



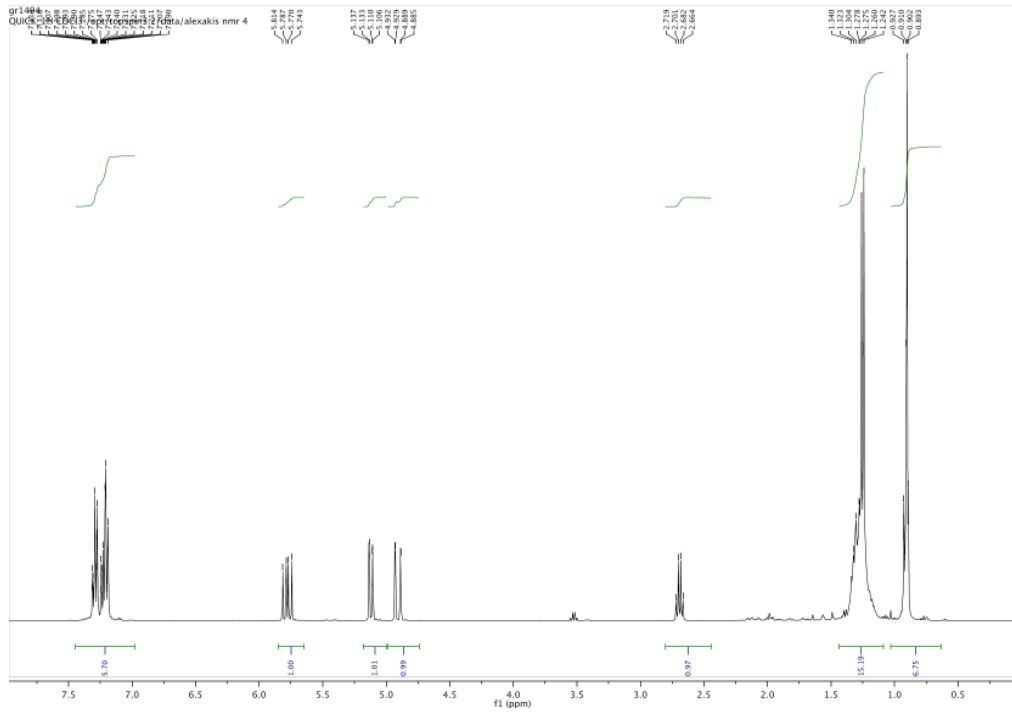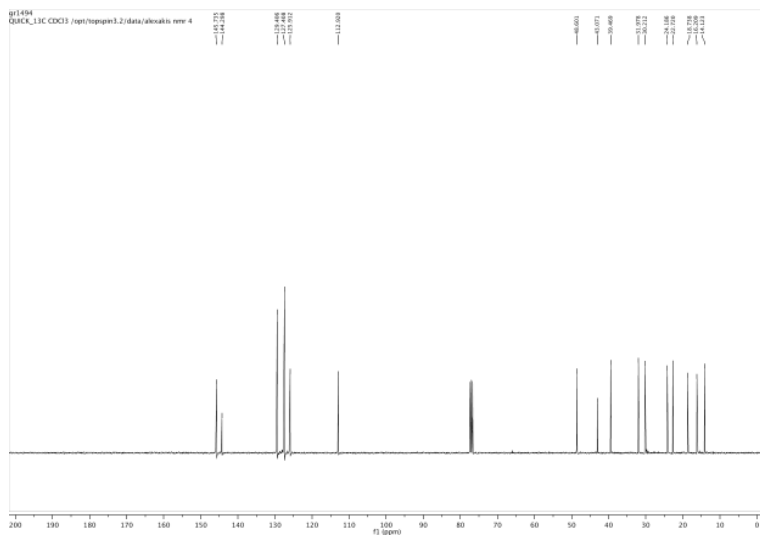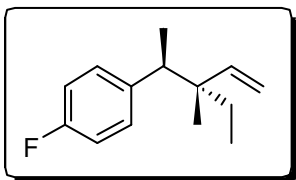



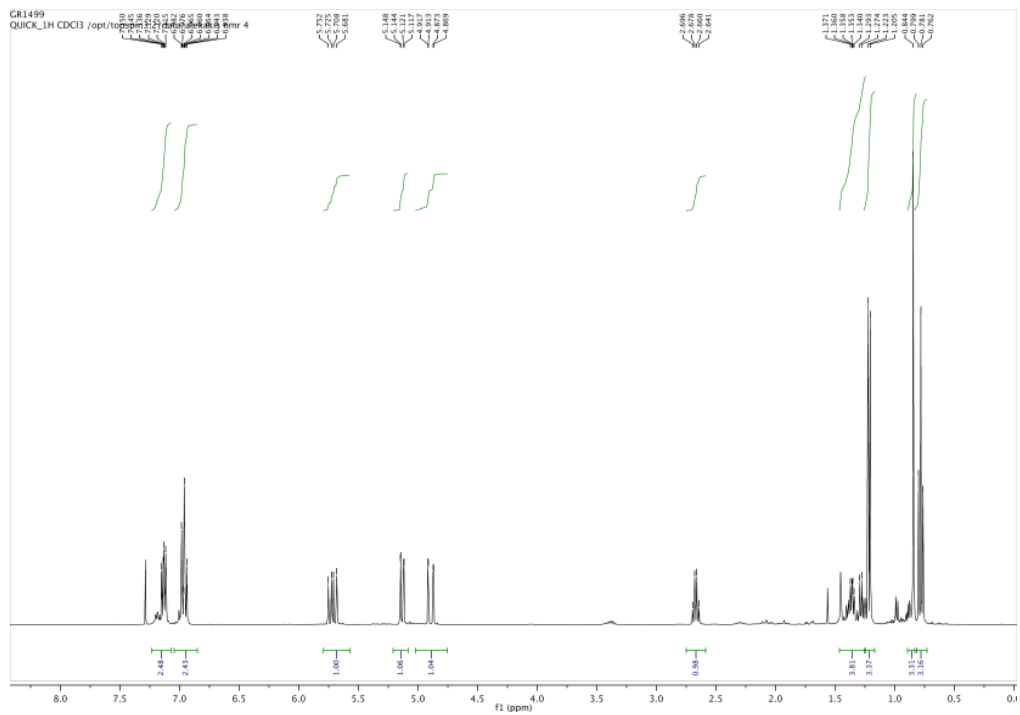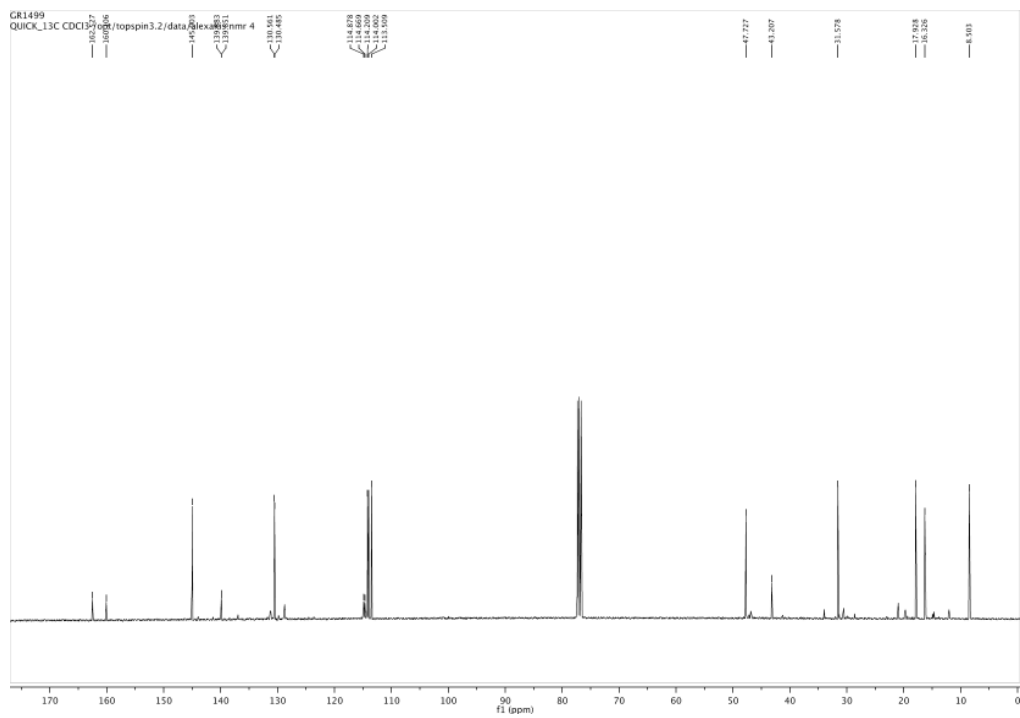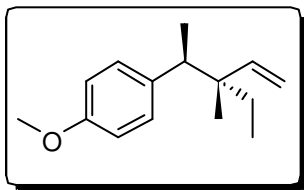

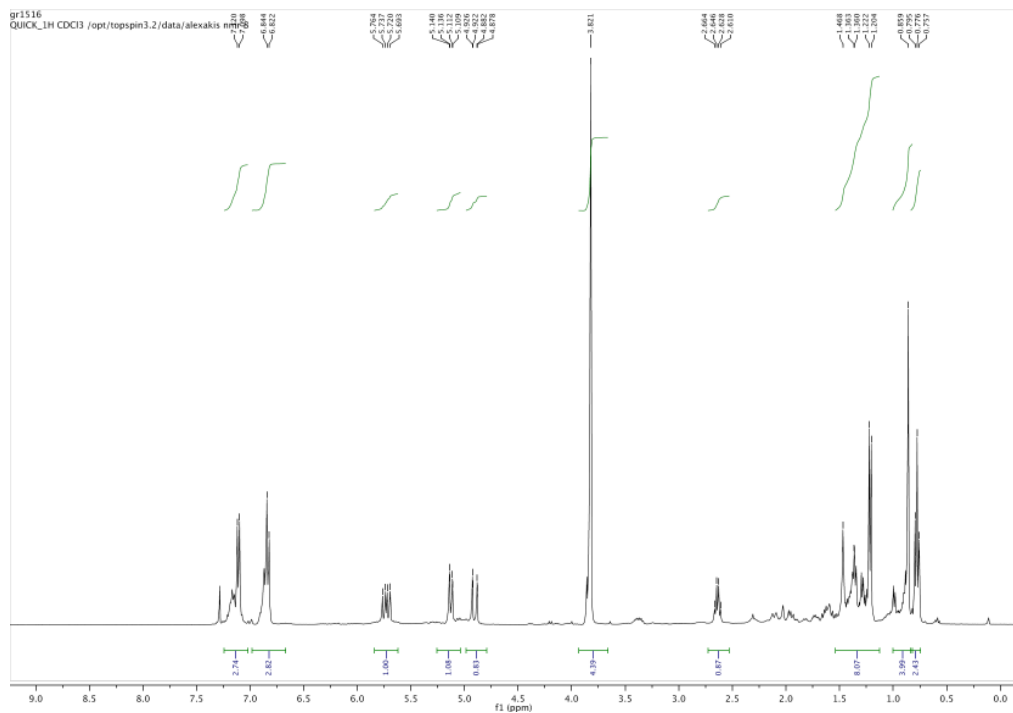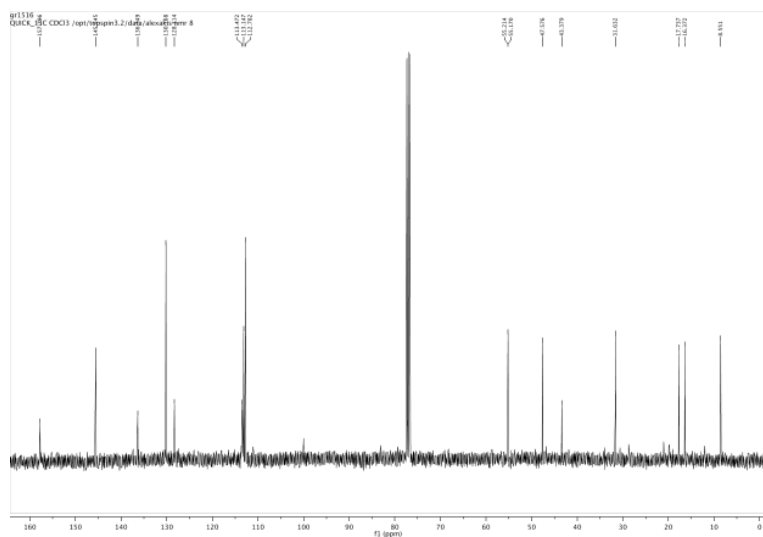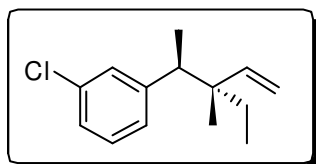



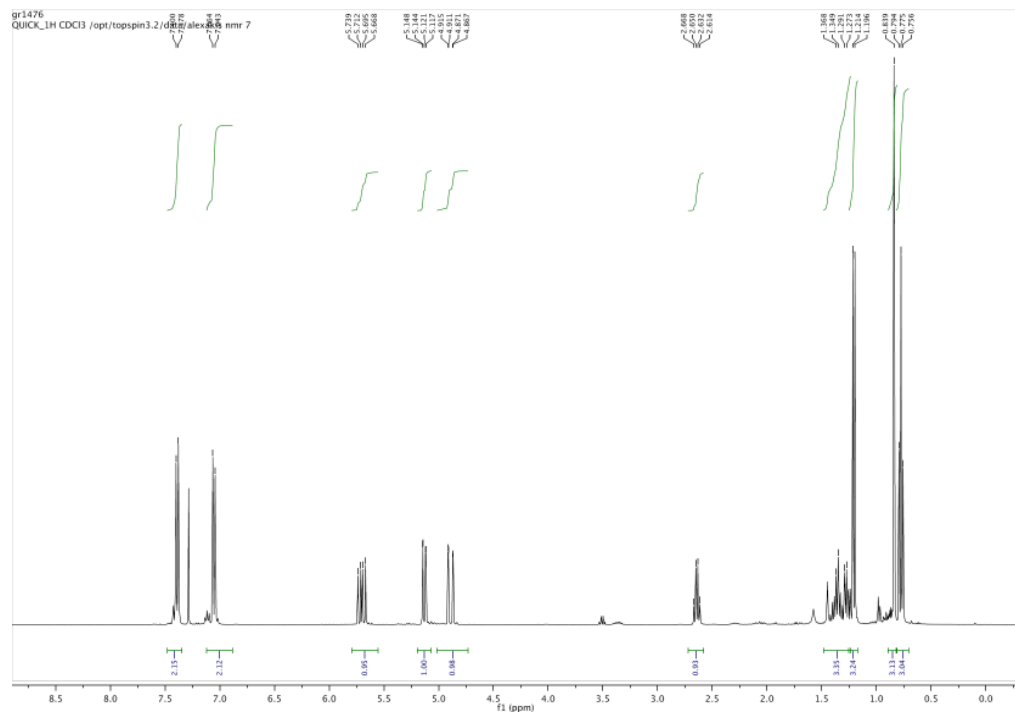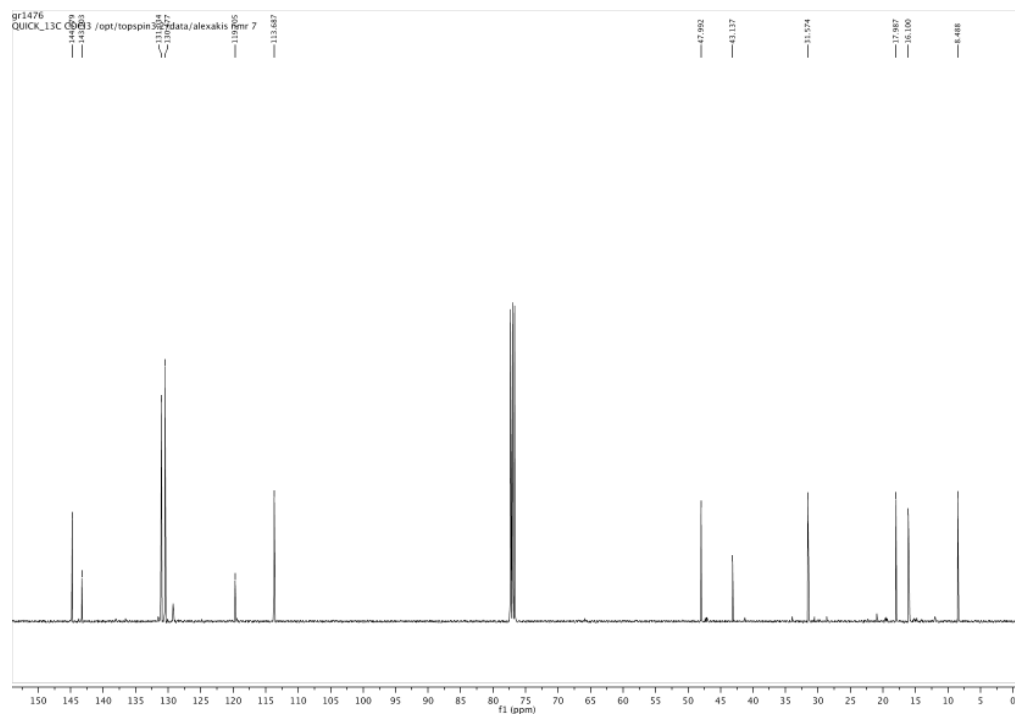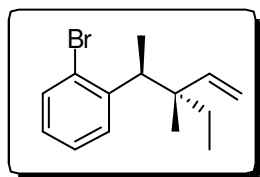

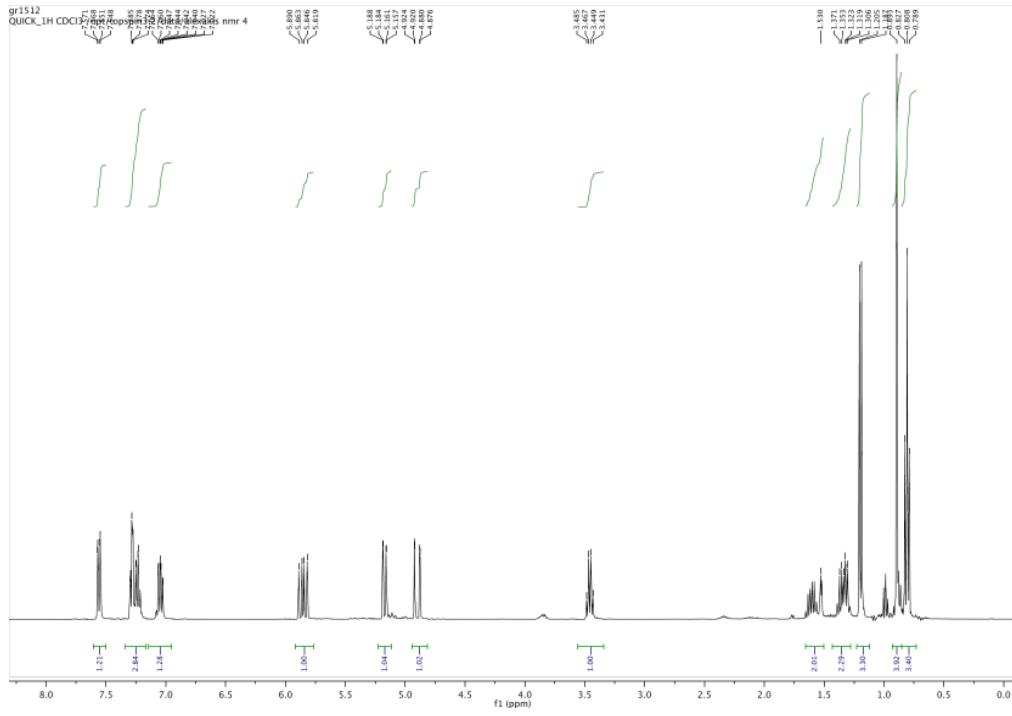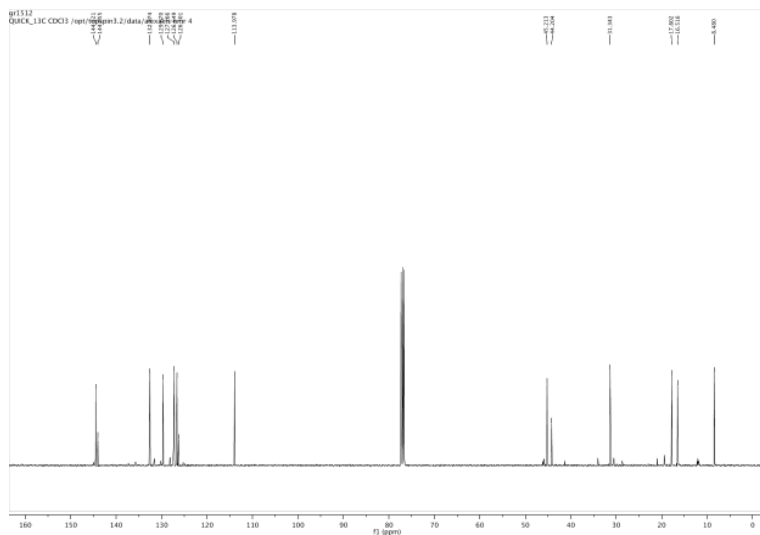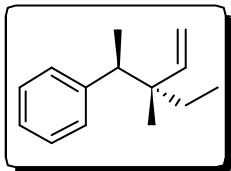

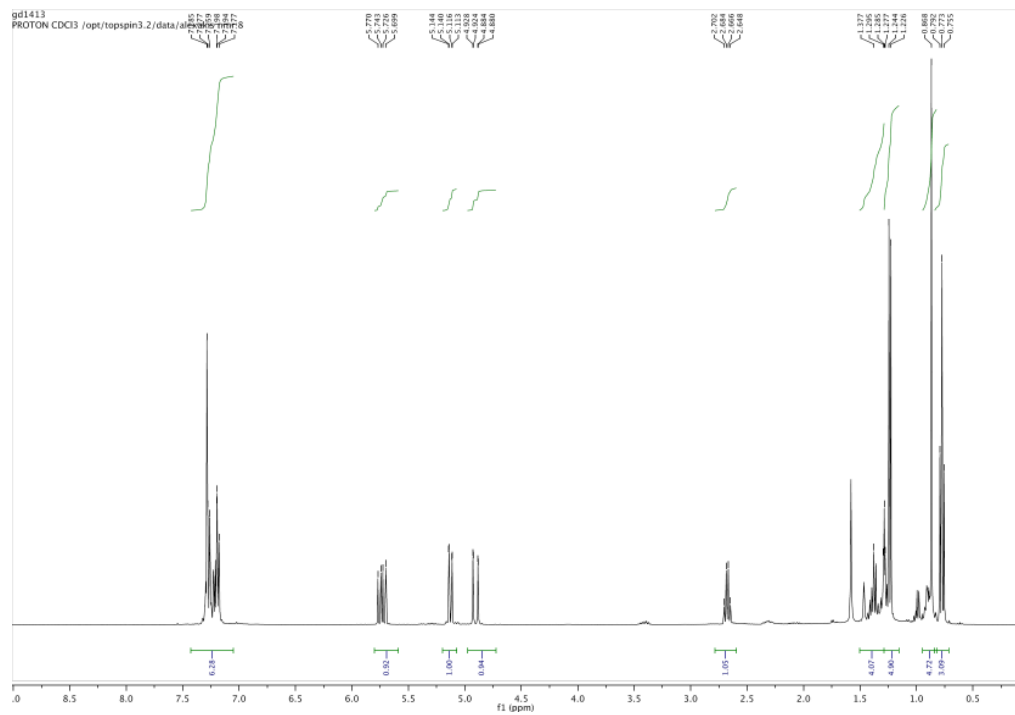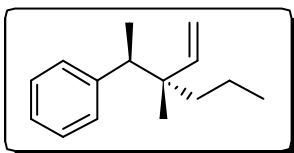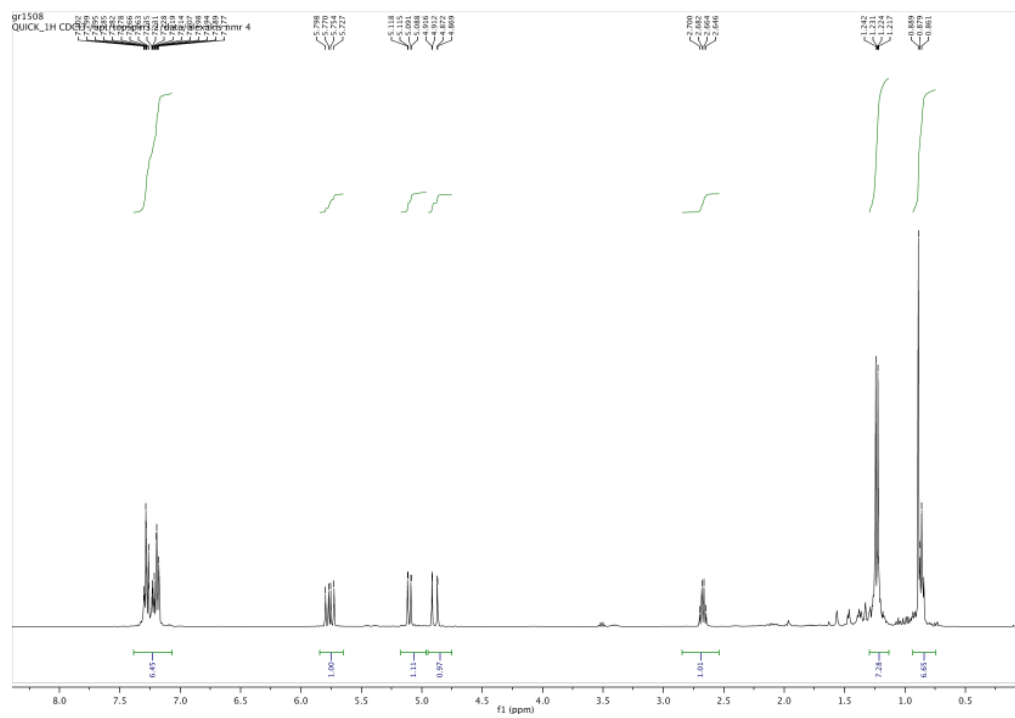

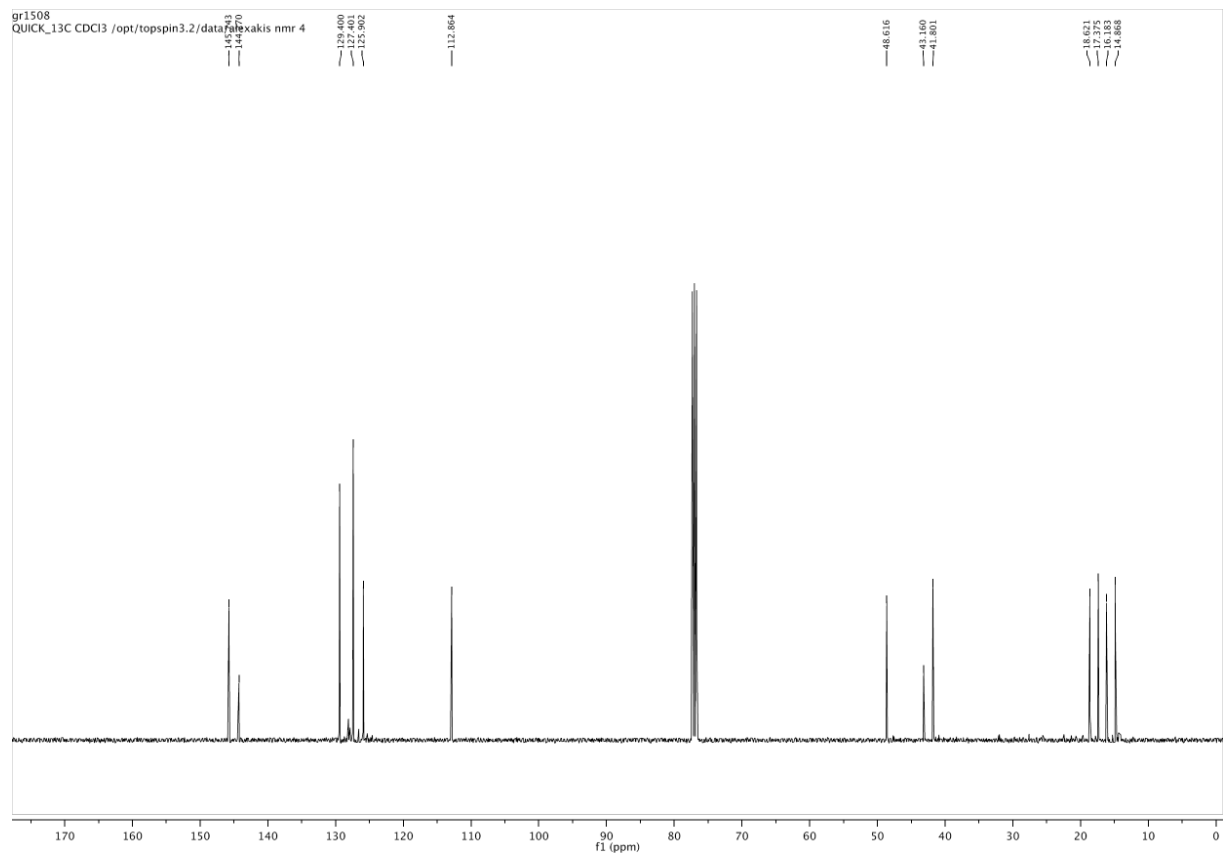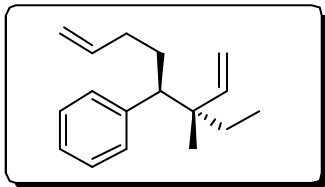





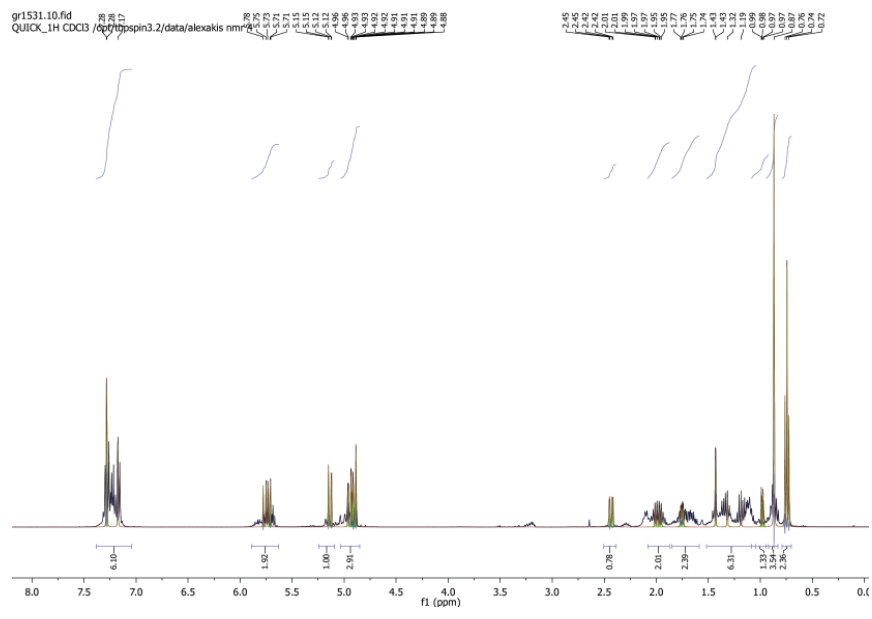

gr1531.11.fid  
QUICK\_13C CDCl3 /opt/topspin3.2/data/alexakis nmr

146.01  
142.24  
138.99  
138.4  
128.01  
127.76  
127.50  
125.97  
114.18  
113.30  
55.14  
43.66  
33.80  
32.41  
29.36  
27.68  
17.72  
8.49

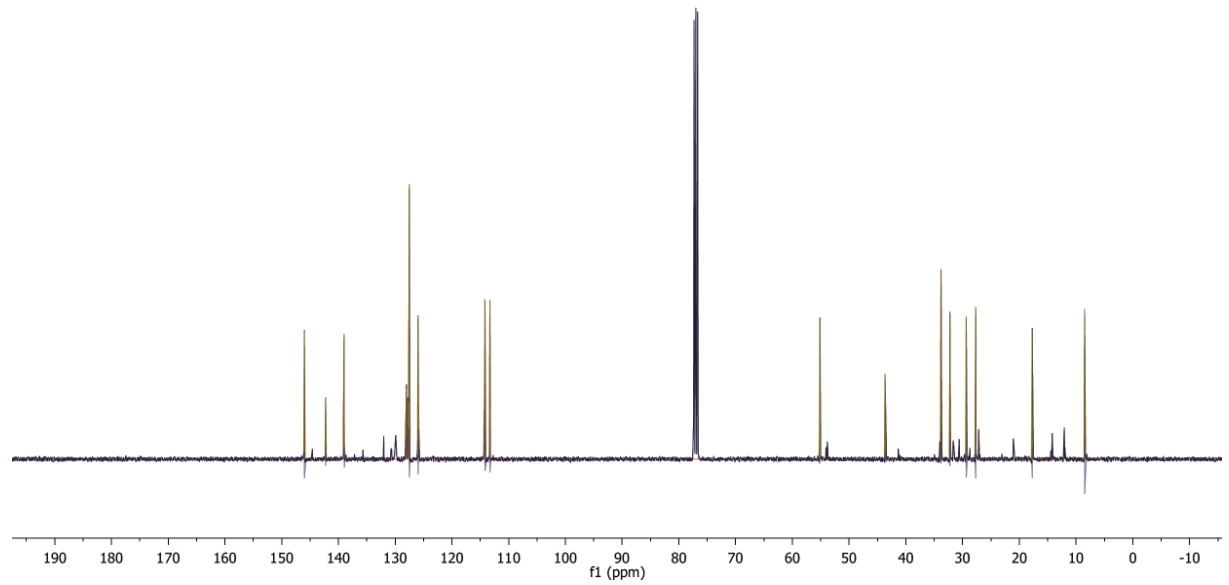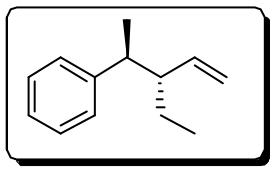

gr1535.2.fid

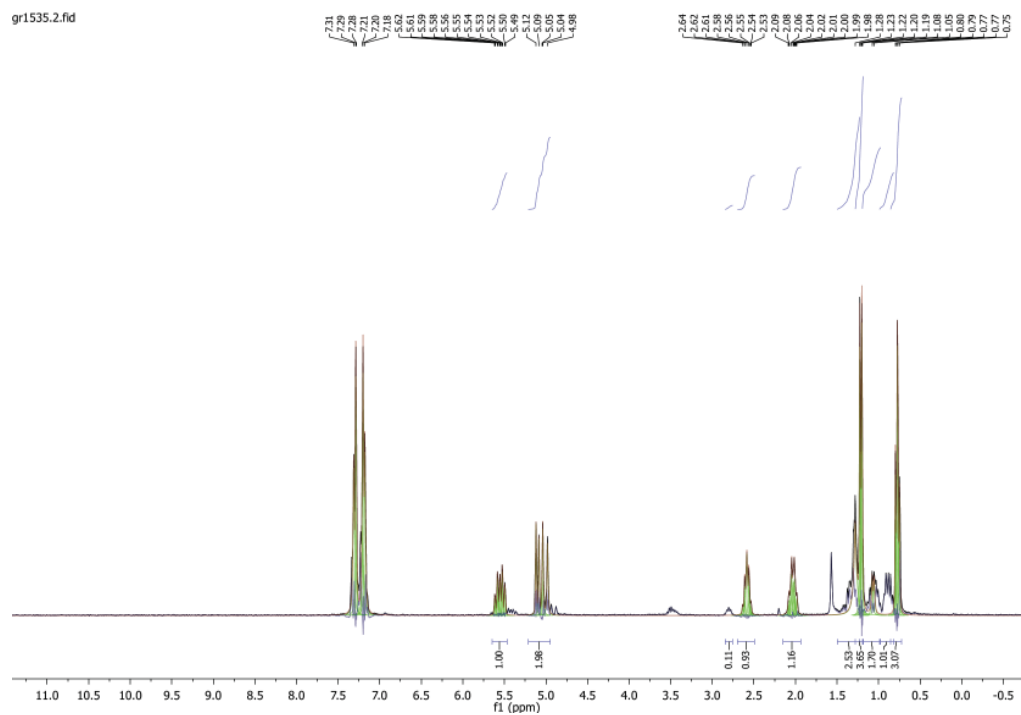

gr1535.11.fid

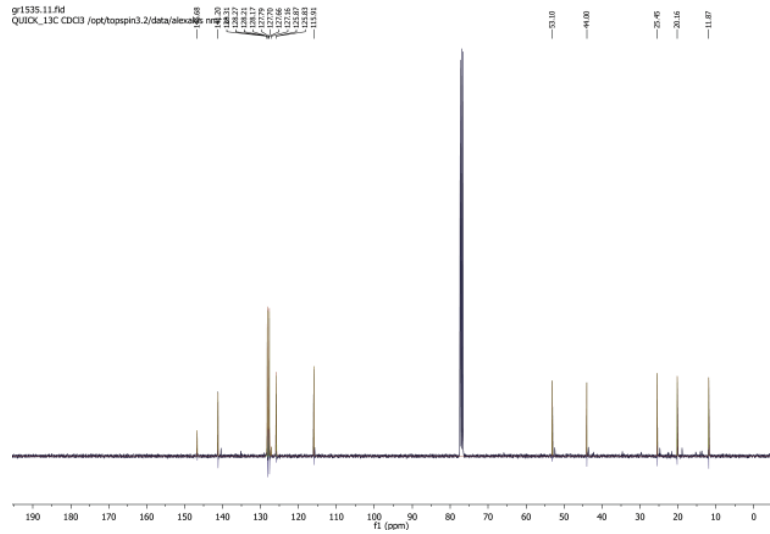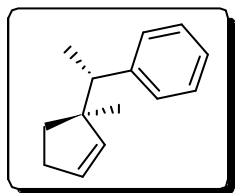

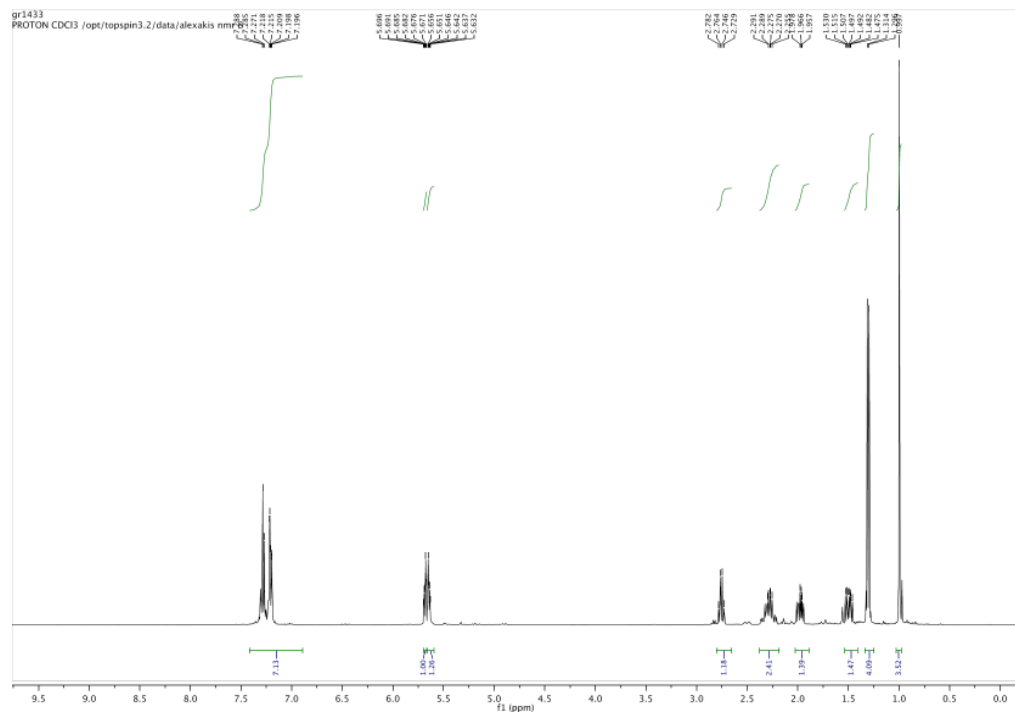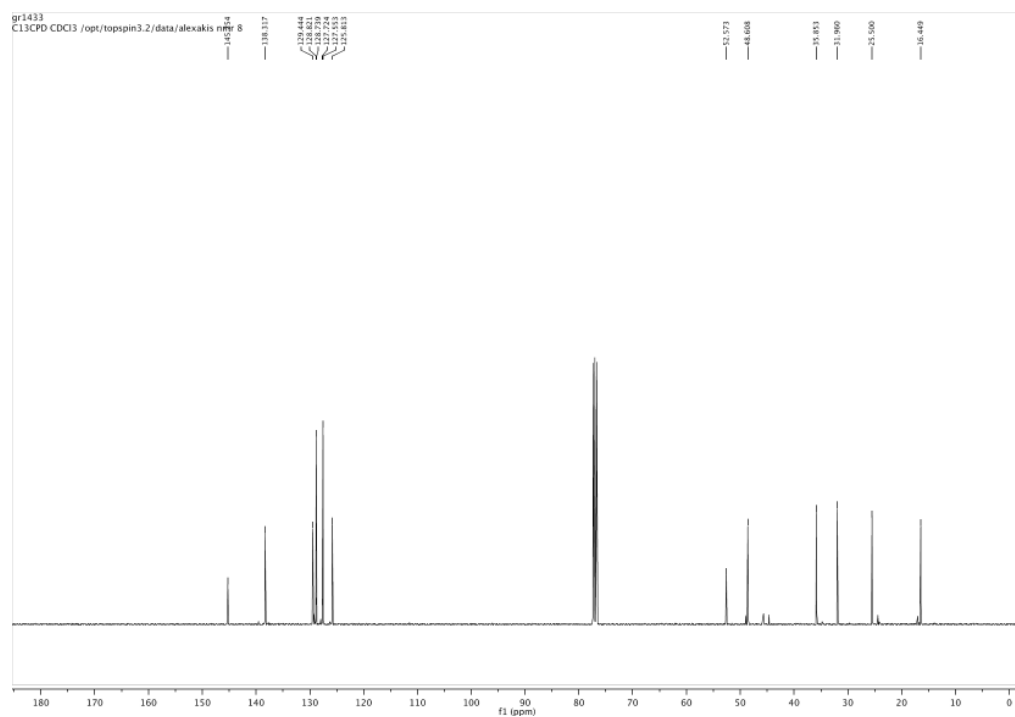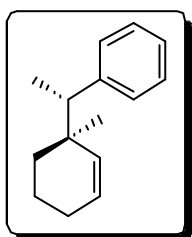

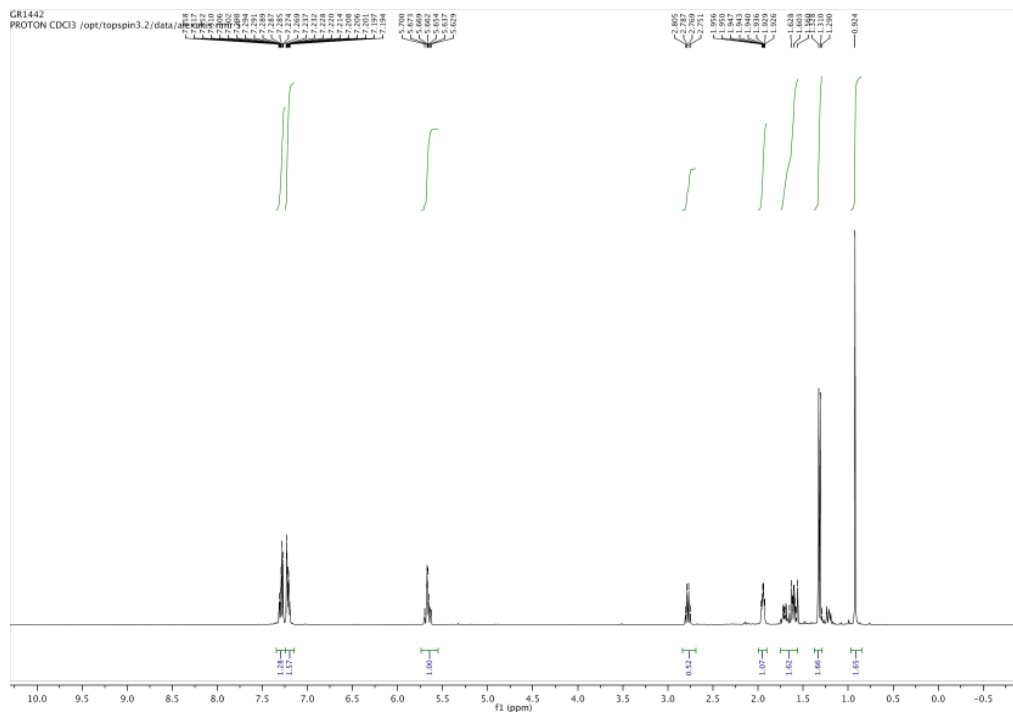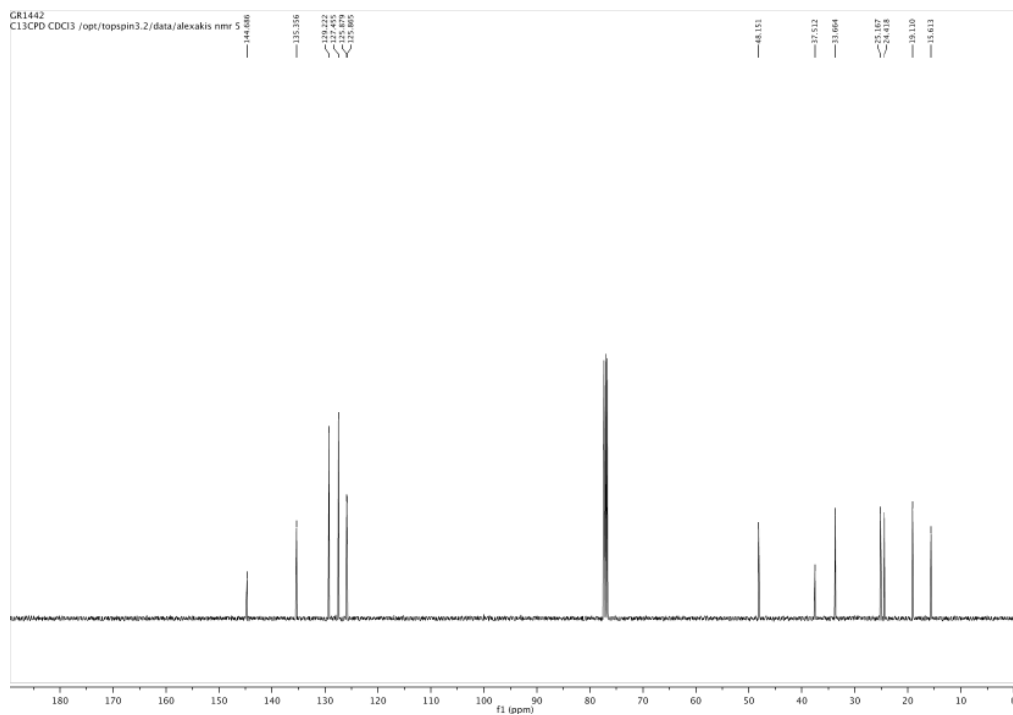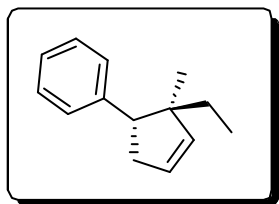

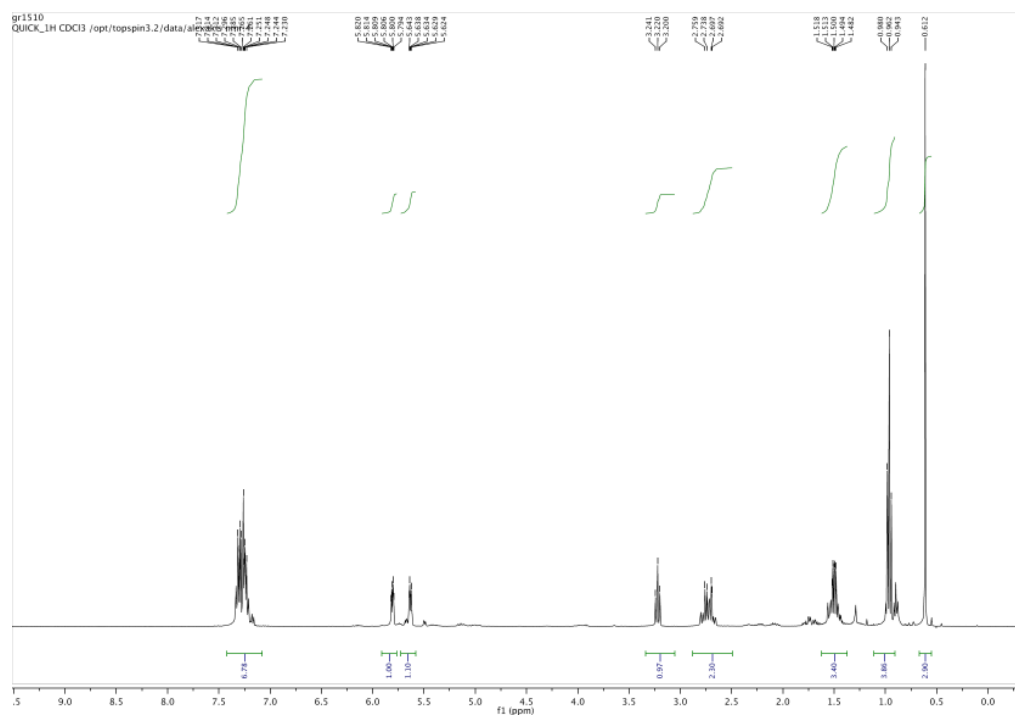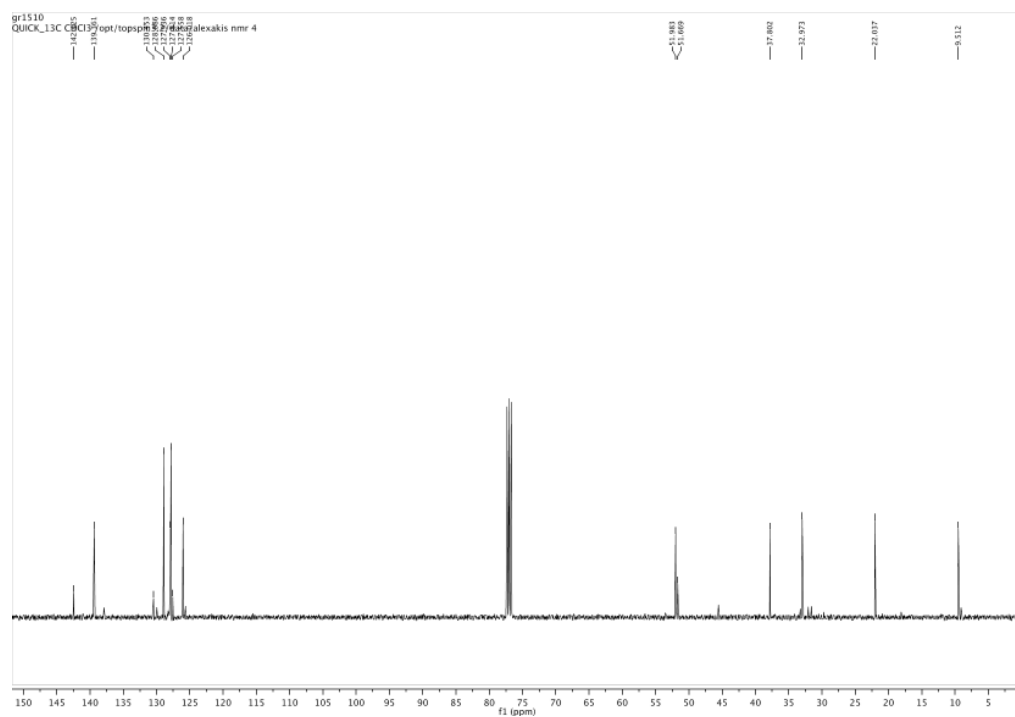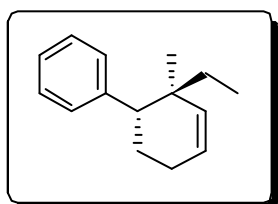

gr1538.10.fid  
 QUICK\_1H CDCl3 /opt/topspin3.2/data/alexakis nmr 4

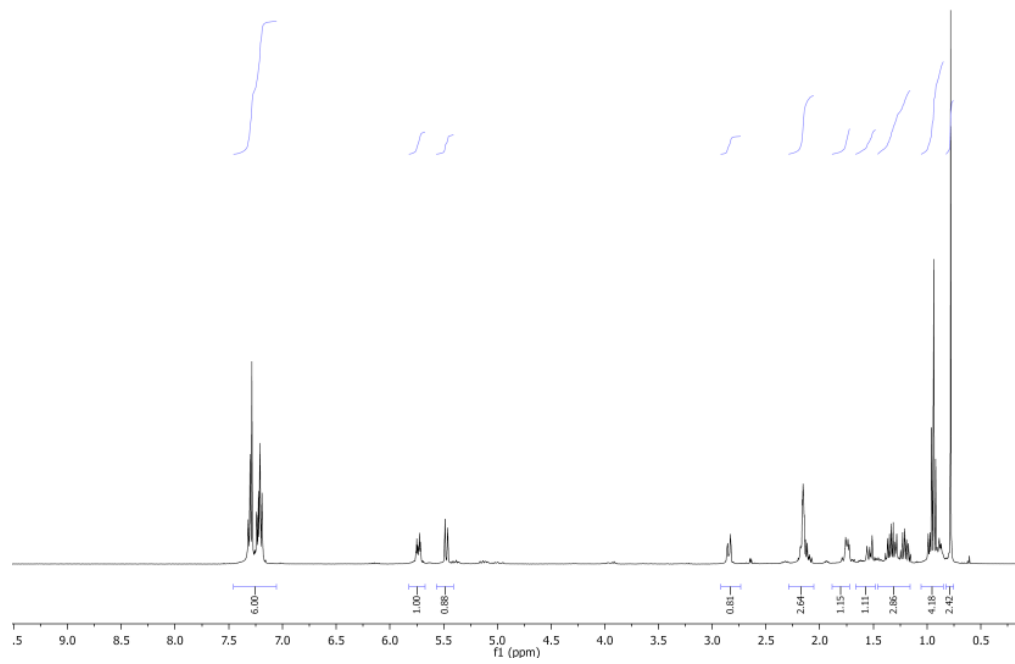

gr1538.11.fid  
 QUICK\_13C CDCl3 /opt/topspin3.2/data/alexakis nmr 4

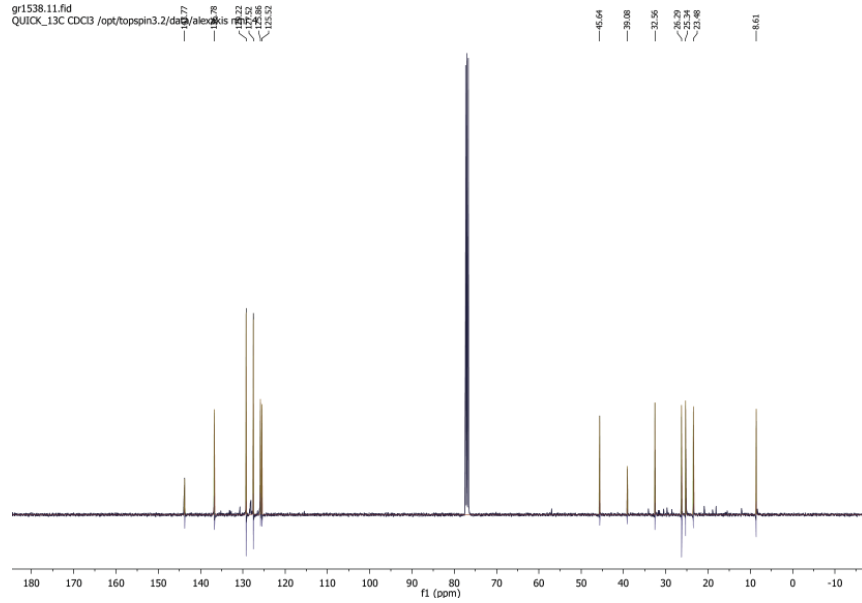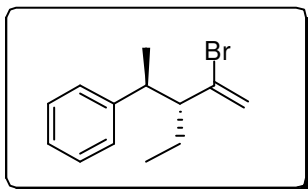

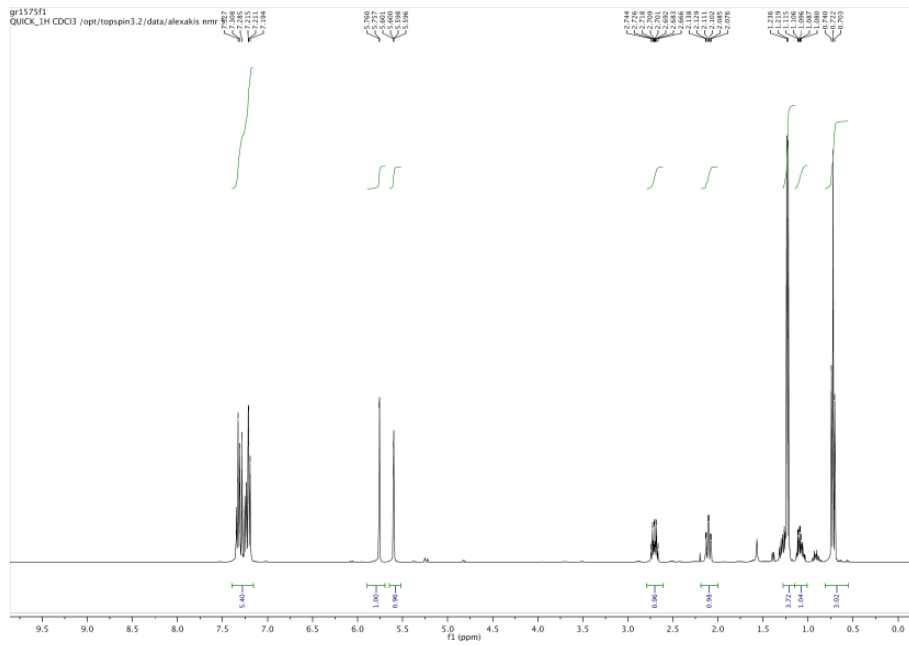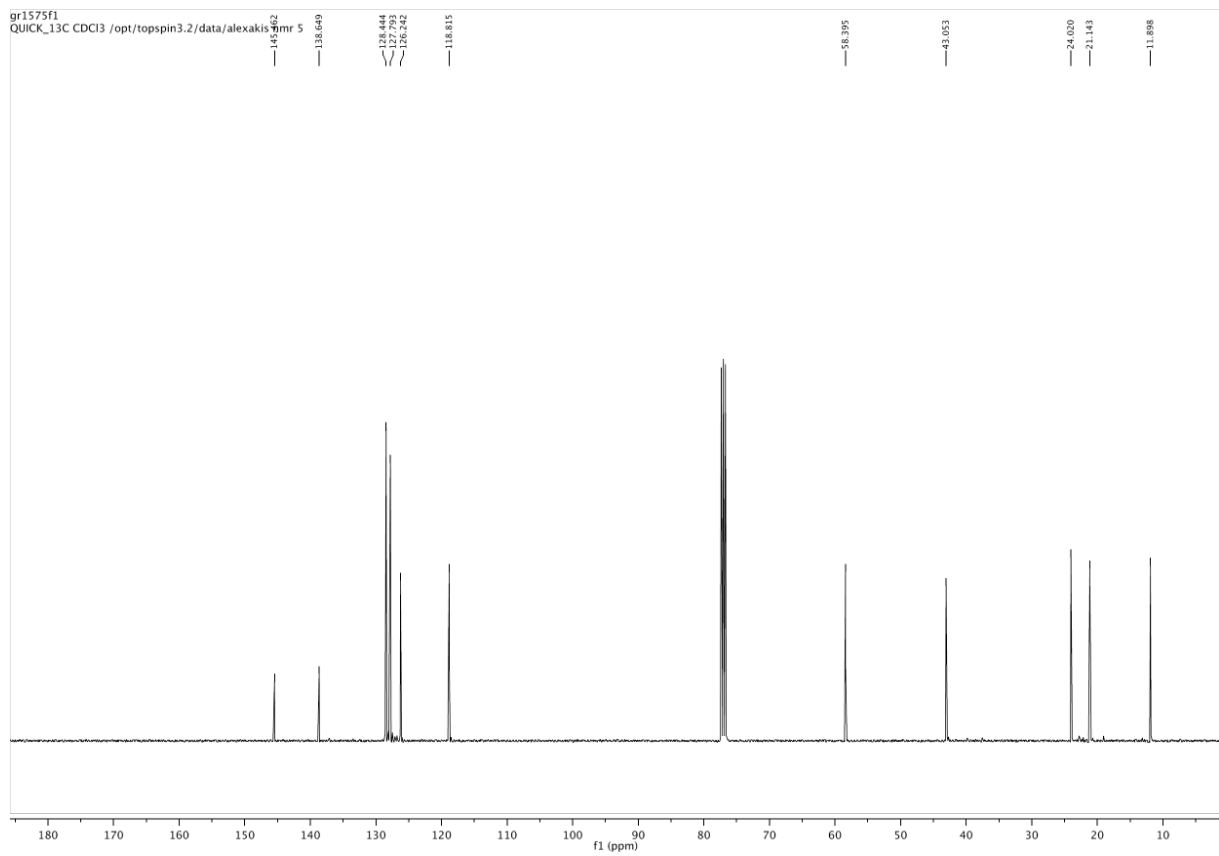

Supplement: c4sc01003e1.pdf [file c4sc01003e1.pdf]
